1 **Running Title: Arabidopsis PeptideAtlas and the dark proteome**

2

3 **For correspondence:**

4 Klaas J. van Wijk - kv35@cornell.edu

5 Eric W. Deutsch - edeutsch@systemsbiology.org

6

7 11 Figures

8 6 Tables

9 Supplemental Data Sets S1-S11

10 Supplemental Figures S1-2

11

12 **Plant Cell – Large Scale biology (LSB)**

13

14

15 **Mapping the *Arabidopsis thaliana* proteome in PeptideAtlas and the nature of the**  
16 **unobserved (dark) proteome; strategies towards a complete proteome**

17

18 Klaas J. van Wijk<sup>a#</sup>, Tami Leppert<sup>b</sup>, Zhi Sun<sup>b</sup>, Alyssa Kearly<sup>c</sup>, Margaret Li<sup>b</sup>, Luis Mendoza<sup>b</sup>,  
19 Isabell Guzchenko<sup>a</sup>, Erica Debley<sup>a</sup>, Georgia Sauermann<sup>a</sup>, Pratyush Routray<sup>a</sup>, Sagunya  
20 Malhotra<sup>b</sup>, Andrew Nelson<sup>c</sup>, Qi Sun<sup>d</sup> and Eric W. Deutsch<sup>b#</sup>

21

22 <sup>a</sup> Section of Plant Biology, School of Integrative Plant Sciences (SIPS), Cornell University,  
23 Ithaca, NY 14853, USA; <sup>b</sup> Institute for Systems Biology (ISB), Seattle, Washington 98109, USA;  
24 <sup>c</sup> Boyce Thompson Institute, Ithaca, NY 14853.; <sup>d</sup> Computational Biology Service Unit, Cornell  
25 University, Ithaca, NY 14853.

26

27 **ORCID ID:** 0000-0001-9536-0487 (K.J.v.W); 0000-0001-8732-0928 (E.W.D.); 0000-0001-6140-  
28 2204 (Q.S.); 0000-0002-7893-8619 (T.L.); 0000-0003-3324-6851 (Z.S.); 0000-0003-0128-8643  
29 (L.M.); 0000-0003-1189-5973 (P.R); 0000-0001-5686-7744 (A.K.); 0000-0001-9896-1739 (A.N)

30

31 # corresponding authors: Klaas J. van Wijk, [kv35@cornell.edu](mailto:kv35@cornell.edu); Eric W. Deutsch:  
32 [edeutsch@systemsbiology.org](mailto:edeutsch@systemsbiology.org)

33

34 **ABSTRACT** This study describes a new release of the *Arabidopsis thaliana* PeptideAtlas  
35 proteomics resource providing protein sequence coverage, matched mass spectrometry (MS)  
36 spectra, selected PTMs, and metadata. 70 million MS/MS spectra were matched to the  
37 Araport11 annotation, identifying ~0.6 million unique peptides and 18267 proteins at the highest  
38 confidence level and 3396 lower confidence proteins, together representing 78.6% of the  
39 predicted proteome. Additional identified proteins not predicted in Araport11 should be  
40 considered for building the next *Arabidopsis* genome annotation. This release identified 5198  
41 phosphorylated proteins, 668 ubiquitinated proteins, 3050 N-terminally acetylated proteins and  
42 864 lysine-acetylated proteins and mapped their PTM sites. MS support was lacking for 21.4%  
43 (5896 proteins) of the predicted Araport11 proteome – the ‘dark’ proteome. This dark proteome  
44 is highly enriched for certain (e.g. CLE, CEP, IDA, PSY) but not other (e.g. THIONIN, CAP,)   
45 signaling peptides families, E3 ligases, TFs, and other proteins with unfavorable  
46 physicochemical properties. A machine learning model trained on RNA expression data and  
47 protein properties predicts the probability for proteins to be detected. The model aids in  
48 discovery of proteins with short-half life (e.g. SIG1,3 and ERF-VII TFs) and completing the

49 proteome. PeptideAtlas is linked to TAIR, JBrowse, PPDB, SUBA, UniProtKB and Plant PTM  
50 Viewer.

51

## 52 INTRODUCTION

53 *Arabidopsis thaliana* (*Arabidopsis*) was established as a universal plant model system in the  
54 1980s as a means of advancing the plant science field (Meinke et al., 1998; Koornneef and  
55 Meinke, 2011). The power of *Arabidopsis* as an experimental model system to discover novel  
56 gene functions and molecular pathways was first demonstrated using loss-of function mutants in  
57 the photorespiratory pathway (Somerville and Ogren, 1980, 1982). Since then, the field of plant  
58 biology, and specifically plant molecular biology and genetics, has expanded enormously and  
59 produced a wealth of knowledge and understanding of plants (Parry et al., 2020; Provart et al.,  
60 2021). A well-organized *Arabidopsis* community with powerful public resources is facilitating and  
61 accelerating new discoveries in Plant Biology (Parry et al., 2020; Alex Mason et al., 2021).

62 *Arabidopsis* also has been established as a model for analysis of its proteome in  
63 particular because mass spectrometry (MS) based proteomics immensely benefits from having  
64 a well-annotated genome with a robust set of predicted proteins (van Wijk et al., 2021). A poorly  
65 annotated genome and poorly predicted proteins diminish the ability to carry out quantitative  
66 proteome analyses and determine the rich complexity of post-translational modifications  
67 (PTMs), including the assignment of PTMs to specific amino acid residues. A range of plant  
68 proteome databases by individual labs has been developed, mostly for *Arabidopsis* proteins,  
69 often focused on a particular aspect of plant proteomics, such as subcellular compartments  
70 (San Clemente and Jamet, 2015; Salvi et al., 2018), protein location (SUBA and PPDB) (Sun et  
71 al., 2009; Tanz et al., 2013), or PTMs (Schulze et al., 2015; Willems et al., 2019). A  
72 comprehensive *Arabidopsis* proteome database (ATHENA) was released to allow mining of a  
73 large-scale experimental proteome dataset involving multiple tissue types as published in  
74 (Mergner et al., 2020). In 2021, we launched the first release of the *Arabidopsis* PeptideAtlas to  
75 address central questions about the *Arabidopsis* proteome, such as experimental evidence for  
76 accumulation of proteins, their approximate relative abundance, the significance of protein  
77 splice forms, and selected PTMs, (van Wijk et al., 2021)  
78 (<https://peptideatlas.org/builds/arabidopsis/>). Species-specific PeptideAtlas resources have also  
79 been developed for non-plant species including human (Omenn et al., 2021), various animals  
80 such as pigs (Hesselager et al., 2016), chicken (McCord et al., 2017), fish (Nissa et al., 2022),  
81 different yeast species (King et al., 2006; Gunaratne et al., 2013) and bacteria (Malmstrom et  
82 al., 2009; Michalik et al., 2017; Reales-Calderon et al., 2021). Each PeptideAtlas is based on

83 published MSMS datasets collected through the ProteomeXchange Consortium (Deutsch et al.,  
84 2023) and reanalyzed through a uniform processing pipeline. In the case of the Arabidopsis  
85 PeptideAtlas, we are particularly keen to annotate the metadata associated with the raw MS  
86 data and to link all peptide identifications to spectral, technical and biological metadata. These  
87 metadata are critical to determine cell-type or sub-cellular specific protein accumulation patterns  
88 and help accomplish the long-term goal of the Arabidopsis community to develop a detailed  
89 Arabidopsis Plant Cell Atlas (Plant Cell Atlas et al., 2021).

90 The current study describes the second PeptideAtlas release, which adds an additional  
91 63 ProteomeXchange datasets (PXD) containing 102 million MSMS spectra to the first release  
92 in 2021. The objectives for this second release were to map peptides to proteins that were not  
93 identified in the 1st release and to extend sequence coverage of already identified proteins. In  
94 addition, the second release would provide deeper coverage for protein phosphorylation and N-  
95 terminal and lysine acetylation, and now also includes PXDs that included specific enrichment  
96 workflows for ubiquitinated proteins (Walton et al., 2016; Grubb et al., 2021). To try to increase  
97 the detection or sequence coverage of proteins, we employed four criteria for the selection of  
98 new PXDs: i) PXDs of specific cell types or specialized subcellular fractions, ii) PXDs that  
99 concern specific protein complexes or protein affinity enrichments, iii) PXDs that are enriched  
100 for specific post-translational modifications, and iv) PXDs that appear to have very high dynamic  
101 resolution and sensitivity by using the latest technologies in mass spectrometry and/or sample  
102 fractionation. The new PeptideAtlas release now maps peptides to 78.6% of the predicted  
103 Arabidopsis proteome, with each mapped peptide connected to the metadata and spectrum  
104 matches. With the ultimate goal to identify the complete Arabidopsis predicted proteome, we  
105 investigated why 21% of the predicted Arabidopsis proteome was not yet observed in this new  
106 build. A significant portion of these unobserved proteins have physicochemical properties that  
107 should impede detection by MS (*e.g.* very small, very hydrophobic). Other unobserved proteins  
108 likely accumulate under highly specific conditions or cell-types and/or have low cellular  
109 abundance. Here we used large scale RNA-seq data sets for Arabidopsis to determine mRNA  
110 expression patterns for these unobserved proteins sampling across many tissue- and cell types,  
111 developmental stages, as well as biotic and abiotic stress conditions. We developed machine  
112 learning models based on these mRNA expression features and physicochemical protein  
113 properties to calculate the probability for each protein to be detected. GO enrichment analysis  
114 showed over-representation of specific functions in the dark proteome, *e.g.* E3 ligases and  
115 signaling peptides. The machine learning model outputs will help design optimal and targeted  
116 experimental strategies to detect these unobserved proteins. Finally, this second PeptideAtlas

117 release including its associated metadata and our machine learning output provides an ideal  
118 platform to contribute to a community Arabidopsis proteome cell atlas (Plant Cell Atlas et al.,  
119 2021; Birnbaum et al., 2022) and also contribute to the ongoing reannotation of the Arabidopsis  
120 genome ([tinyurl.com/Athalianav12](https://tinyurl.com/Athalianav12)). The new PeptideAtlas release is integrated into TAIR  
121 (<https://www.arabidopsis.org/>) and linked to JBrowse (<https://jbrowse.arabidopsis.org>), PPDB  
122 (Sun et al., 2009), SUBA (Hooper et al., 2017), UniProtKB (UniProt, 2023) and Plant PTM  
123 Viewer (Willems, 2022).

124

## 125 **MATERIALS AND METHODS**

126 **Selection and downloads of ProteomeXchange submissions** Raw files for the selected  
127 PXDs were downloaded from ProteomeXchange (<http://www.proteomexchange.org/>)  
128 repositories. Supplemental Table Data Set 1 provides detailed information about the 63 newly  
129 selected PXDs, as well as the 52 PXDs that were part of the first build; this includes information  
130 about instrument, sample (e.g. subcellular proteome, plant organ), number of raw files and  
131 MSMS spectra (searched and matched), identified proteins and peptides, submitting lab and  
132 associated publication, as well as several informative key words.

133

134 **Extraction and annotation of metadata** For each selected dataset, we obtained information  
135 associated with the submission, and the publication if available, to determine search parameters  
136 and provide meaningful tags that describe the samples in some detail. These tags are visible for  
137 the relevant proteins in the PeptideAtlas interface. If needed, we contacted the submitters for  
138 more information about the raw files. All collected metadata are stored in our annotation system  
139 as previously described (van Wijk et al., 2021). These metadata can be viewed for each  
140 identified protein in PeptideAtlas.

141

142 **Assembly of protein search space** We assembled a comprehensive protein search space  
143 comprising the predicted *Arabidopsis* protein sequences from i) Araport11 (Cheng et al., 2017),  
144 ii) TAIR10 (Lamesch et al., 2012), iii) UniProtKB (UniProt, 2020), iv) RefSeq  
145 (<https://www.ncbi.nlm.nih.gov/refseq>) (Li et al., 2021), v) from the repository ARA-PEPs  
146 (Hazarika et al., 2017) with 7901 small Open Reading Frames (sORFs), 16809 low molecular  
147 weight peptides and proteins (LWs; between 26 and 250 aa; median 37 aa), as well as 607  
148 novel stress-induced peptides (SIPs) most of which are currently not annotated in TAIR10 or  
149 Araport11, vi) from Dr Eve Wurtele (Iowa State University) assembled based on RNA-seq data,  
150 vii) GFP, RFP and YFP protein sequences commonly used as reporters and affinity

151 enrichments, viii) 116 contaminant protein sequences frequently observed in proteome samples  
152 (e.g. keratins, trypsin, BSA) (<https://www.thegpm.org/crap/>). This search space is quite similar  
153 as for the first PeptideAtlas release, except that the UniProtKB and RefSeq contributions were  
154 updated to the latest version as of 2021-04. Also added was the complete set of predicted  
155 protein sequences for the 950 Araport11 pseudogenes (1240 gene models) that we generated  
156 through 3-frame translation (the pseudogene sequences have transcription direction, but no  
157 frame).

158 We also included an update on the plastid- and mitochondrial-encoded proteins to  
159 address redundancies in plastid- and mitochondrial ATGC and ATMG identifiers, and inclusion  
160 of protein sequences for those plastid- and mitochondrial encoded proteins that are predicted to  
161 be affected by RNA editing. For the mitochondrial-encoded proteins, we included 420 editing  
162 sites in 29 mitochondrial-encoded proteins and two ORFs, most of which are described in  
163 (Sloan et al., 2018) whereas we included edited sequences for 17 plastid-encoded proteins that  
164 included 31 amino acid changes and generation of one start methionine. These organellar-  
165 encoded sequences included unedited sequences, completely edited sequences, and if editing  
166 sites were sufficiently close together to appear in a single peptide, we also include all  
167 permutations of edits and non-edits. This resulted in the addition of 10,368 sequences for  
168 plastid- and mitochondrial encoded variants to the search database. In a forthcoming study (van  
169 Wijk et al, in preparation), we will provide details on the annotation and redundancy of plastid-  
170 and mitochondrial encoded proteins, the expression of organellar ORFs, and the impact of RNA  
171 editing.

172  
173 **The Trans-Proteomic Pipeline (TPP) data processing pipeline** For all selected datasets, the  
174 vendor-format raw files were downloaded from the hosting ProteomeXchange repository,  
175 converted to mzML files (Martens et al., 2011) using ThermoRawFileParser (Hulstaert et al.,  
176 2020) for Thermo Fisher Scientific instruments or the msconvert tool from the ProteoWizard  
177 toolkit (Chambers et al., 2012) for SCIEX wiff files, and then analyzed with the TPP (Keller et al.,  
178 2005; Deutsch et al., 2015) version 6.2.0 (Deutsch et al., 2023). The TPP analysis consisted of  
179 sequence database searching with either Comet (Eng and Deutsch, 2020) for LTQ-based  
180 fragmentation spectra or MSFragger 3.2 (Kong et al., 2017) for higher resolution fragmentation  
181 spectra and post-search validation with several additional TPP tools as follows: PeptideProphet  
182 (Keller et al., 2002) was run to assign probabilities of being correct for each peptide-spectrum  
183 match (PSM) using semi-parametric modeling of the search engine expect scores with z-score  
184 accurate mass modeling of precursor m/z deltas. These probabilities were further refined via

185 corroboration with other PSMs, such as multiple PSMs to the same peptide sequence but  
186 different peptidofoms or charge states, using the iProphet tool (Shteynberg et al., 2011).

187 For datasets in which trypsin was used as the protease to cleave proteins into peptides,  
188 two parallel searches were performed, one with full tryptic specificity and one with semi-tryptic  
189 specificity. The semi-tryptic searches were carried out with the following possible variable  
190 modifications (5 max per peptide for Comet and 3 for MSFragger): oxidation of Met or Trp  
191 (+15.9949), acetylation of Lys (+42.0106), peptide N-terminal Gln to pyro-Glu (-17.0265),  
192 peptide N-terminal Glu to pyro-Glu (-18.0106), deamidation of Asn or Gln (+0.9840), peptide N-  
193 term acetylation (+42.0106), and if peptides were specifically affinity enriched for  
194 phosphopeptides, also phosphorylation of Ser, Thr or Tyr (+79.9663). For the fully tryptic  
195 searches, we also added oxidation of His (+15.9949) and formylation of peptide N-termini, Ser,  
196 or Thr (+27.9949)] - we deliberately restricted these latter PTMs to only full tryptic (rather than  
197 also allowing semi-tryptic) to reduce the search space and computational needs. Formylation is  
198 a very common chemical modification that occurs in extracted proteins/peptides during sample  
199 processing, whereas His oxidation is observed less frequently, but nevertheless at significant  
200 levels (Verrastro et al., 2015; Hawkins and Davies, 2019). In both semi-tryptic and full tryptic  
201 searches, fixed modifications for carbamidomethylation of Cys (+57.0215) if treated with  
202 reductant and iodoacetamide (or other alkylating reagents) and isobaric tag modifications (TMT,  
203 iTRAQ) were applied as appropriate. Both variable and fixed modifications were applied to  
204 dimethyl labeled datasets as appropriate. Four missed cleavages were allowed (RP or KP do  
205 not count as a missed cleavage). Several PXDs were generated using other proteases (GluC,  
206 ArgC, Chymotrypsin); these data sets were processed similarly to those generated by trypsin  
207 with the exception that the relevant enzyme was chosen. Some of the datasets derived from  
208 analysis of extracted peptidomes in which 'no protease treatment' was used and these datasets  
209 were searched with 'no enzyme'.

210

211 **PeptideAtlas Assembly** In order to create the combined PeptideAtlas build of all experiments,  
212 all datasets were thresholded at an iProphet probability that yields the model-based PSM FDR  
213 of 0.0008. The exact probability varied from experiment to experiment depending on how well  
214 the modeling can separate correct from incorrect. This probability threshold was typically greater  
215 than 0.99. As more and more experiments are combined, the total FDR increases unless the  
216 threshold is made more stringent (Deutsch et al., 2016). Throughout the procedure, decoy  
217 identifications were retained and then used to compute final decoy-based FDRs. The decoy  
218 count-based PSM-level FDR was 0.0001 (8001 decoy PSMs out of 70 million), peptide

219 sequence-level FDR is 0.001 (728 decoy sequences out of 596,839), and the final canonical  
220 protein-level FDR was 0.0005 (10 decoy proteins out of 18,267 with canonical status). Among  
221 proteins with lesser status (weak, insufficient evidence, etc.) there are 645 decoys out of 21,854  
222 yielding an FDR of 0.03. Because of the tiered system, high quality MSMS spectra that were  
223 matched to a peptide are never lost, even if a single matched peptide by itself cannot  
224 confidently identify a protein.

225

226 **Protein identification confidence levels and classification.** Proteins were identified at  
227 different confidence levels using standardized assignments to different confidence levels based  
228 on various attributes and relationships to other proteins. The highest level is canonical and  
229 lowest is 'not detected'. In between are various levels of uncertain and redundant proteins; this  
230 tier system was described in detail in (van Wijk et al., 2021) and will not be repeated here.

231

232 **Handling of gene models and splice forms.** The 27655 protein coding genes in Araport11 are  
233 represented by 48359 gene models (transcript isoforms), which are identified by the digit after  
234 the AT identifier (e.g. AT1G10000.1). We refer to the translations of these gene models as  
235 protein isoforms. Most protein isoforms are either identical or very similar (differing only a few  
236 amino acid residues often at the N- or C-terminus). It is often hard to distinguish between  
237 different protein isoforms due to the incomplete sequence coverage inherent to most MS  
238 proteomics workflows. For the assignment of canonical proteins (at least two uniquely mapping  
239 peptides identified), we selected by default only one of the protein isoforms as the canonical  
240 protein; this was the '.1' isoform unless one of the other isoforms had a higher number of  
241 matched peptides. However, if other protein isoforms did have detected peptides that are  
242 unique from the canonical protein isoform (e.g. perhaps due to a different exon), then they can  
243 be given canonical (tier 1) or less confident tier status depending on the nature of the additional  
244 uniquely mapping peptides (length and numbers). If the other protein isoforms do not have any  
245 uniquely mapping peptides amongst all protein isoforms (for that gene), then they are classified  
246 as redundant.

247

248 **Integration of PeptideAtlas results in other web-based resources** PeptideAtlas is  
249 accessible through its web interface at <https://peptideatlas.org>. Furthermore, direct links are  
250 provided between PeptideAtlas and PPDB (<http://ppdb.tc.cornell.edu/>), UniProtKB  
251 (<https://www.uniprot.org/>), TAIR (<https://www.arabidopsis.org/>), Plant PTM Viewer  
252 (<https://www.psb.ugent.be/webtools/ptm-viewer/>), PhosPhAt ([8](http://phosphat.uni-</a></p></div><div data-bbox=)



253 [hohenheim.de/](https://www.hohenheim.de/) , SUBA5 (<https://suba.live/>), ATHENA  
254 ([http://athena.proteomics.wzw.tum.de:5002/master\\_arabidopsisshiny/](http://athena.proteomics.wzw.tum.de:5002/master_arabidopsisshiny/)), and several more. Links  
255 to matched peptide entries in PeptideAtlas are available in the Arabidopsis annotated genome  
256 through a specific track in JBrowse at <https://jbrowse.arabidopsis.org>.

257

258 **Protein physicochemical properties and functions** To characterize the canonical and  
259 unobserved proteomes, physicochemical properties were calculated or predicted using various  
260 web-based tools. These include: protein length, mass, GRAVY index, isoelectric point (pI),  
261 number of transmembrane domains (<http://www.cbs.dtu.dk/services/TMHMM>) and sorting  
262 sequences for the ER, plastids and mitochondria (<http://www.cbs.dtu.dk/services/TargetP-1.0/>).

263

264 **Assembly and quality control filtering of the RNA dataset** 13,673 single and paired end  
265 RNA-seq datasets from (Palos et al., 2022) were run through featureCounts (Liao et al., 2014)  
266 to count reads aligning to each of the 27,655 Arabidopsis genes. Lower quality datasets were  
267 filtered out based on a minimum total read count (5,000,000), eliminating 7,994 datasets.  
268 Transcripts Per Million (TPM) expression values were calculated for the remaining 5,679  
269 datasets. Genes for which expression above zero TPM was not detected in any of the remaining  
270 datasets were removed, eliminating 398 genes. The median TPM value for each dataset was  
271 then calculated and used as the threshold for the identification of expressed genes within the  
272 dataset. Six datasets had a median of 0 and were removed from the analysis. Furthermore, 345  
273 protein-coding genes were never expressed above the median. These genes and the datasets  
274 in which they are transcribed are described in the Supplemental Data Set 2.

275

276 **Machine learning - Developing Classification Models** The artificial neural network (ANN)  
277 model and the random decision forest (RDF) models are trained using Python 3.8.10 with  
278 TensorFlow 2.12.0 and TensorFlow Decision Forests 1.3.0 respectively. The input file used for  
279 both models is derived from a dataset containing 23,674 Arabidopsis canonical and unobserved  
280 proteins and their attributes. Each entry in the dataset includes the protein's identifier, gene  
281 symbol, the chromosome on which it is found, its status of being "canonical" or "not observed",  
282 number of recorded observations, a short description, molecular weight, gravity, pI, percentage of  
283 RNA-seq datasets detecting it, and highest TPM. Only the last five columns are selected for  
284 training in the input file. To accommodate the prediction tools, the status is denoted by a 1 or 0  
285 that represents "canonical" or "not observed" respectively. All Python code used for the

286 modeling and the output files are available on GitHub at  
287 <https://github.com/PlantProteomes/ArabidopsisDarkProteome>.

288

## 289 RESULTS & DISCUSSION

290

291 **Selection of PXDs** In July 2022, there were ~630 PXDs for Arabidopsis publicly available in  
292 ProteomeXchange (Figure 1A) most of which were submitted through PRIDE (Perez-Riverol et  
293 al., 2018; Perez-Riverol et al., 2022) (89%) and the remainder through MassIVE (Pullman et al.,  
294 2018), JPOST (Moriya et al., 2019), iProX (Ma et al., 2019) or Panorama Public (Sharma et al.,  
295 2018). For most of these PXDs (84%) the MS data were acquired using an Orbitrap type  
296 instrument (e.g., Q Exactive models, LTQ-Orbitrap Velos/XL/Elite, Orbitrap Fusion Lumos) and  
297 the remainder a variety of instruments (e.g. TripleTOF and Maxis/Impact II) from different  
298 vendors (Figure 1B). For build 2, we selected 63 new PXDs and analyzed these together with all  
299 52 datasets from build 1. Table 1 summarizes key information for all 115 selected PXDs in build  
300 2; additional information can be found in Supplemental Data Set 1. These new PXDs were  
301 selected because they appeared the most promising to identify new proteins and selected  
302 PTMs, as well as increase sequence coverage of proteins already identified at lower (non-  
303 canonical) confidence levels. For example, the selected PXDs concerned specific protein  
304 complexes (e.g. mitochondrial ribosomes PXD010324 (Waltz et al., 2019)), proximity labeling to  
305 target subcellular complexes (e.g. the nuclear pore complex PXD015919 (Huang et al., 2020),  
306 and subcellular localizations (e.g. clathrin-coated vesicles PXD026180 (Dahhan et al., 2022)  
307 that were underrepresented. We also selected two large studies involving affinity-enrichment for  
308 ubiquitination (Walton et al., 2016; Grubb et al., 2021), a study enriching for SUMOylated  
309 proteins (Rytz et al., 2018), as well as additional PXDs involving n-terminal or lysine acetylation  
310 or phosphorylation. We do note that most PXDs involved the Col-0 ecotype (for which most  
311 community resources are available), but one study used ecotype *Wassilewskija* (Ws) and six  
312 studies used cell cultures generated from *Landsberg erecta* (Ler). Because of the complexities  
313 of data processing and control of the overall false discovery rate (FDR), we excluded data sets  
314 obtained through data independent acquisition (DIA), targeted MS (MRM or SRM) and only  
315 considered data dependent acquisition (DDA). However, we did include stable isotope labeled  
316 (multiplexed) proteome datasets, including isobaric iTRAQ and TMT (Rauniyar and Yates,  
317 2014; Chen et al., 2021), dimethyl labeling (Hsu et al., 2003), as well as N-terminomics datasets  
318 using TAILS (Kleifeld et al., 2011) or COFRADIC (Gevaert et al., 2003). Finally, we also  
319 considered mass spectrometer type with preference for Orbitrap-type instruments (Thermo)

320 because of their high mass accuracy, ease of reprocessing, and because ~84% of all available  
321 PXDs in ProteomeXchange used such Orbitrap instruments (Table 1; Figure 1B).

322

323 ***Assembly of a comprehensive protein search space to maximize protein discovery*** We  
324 assembled a comprehensive protein search space (Table 2) that included the two most recent  
325 Arabidopsis annotations (Araport 11 and TAIR10). These are still both used in recent  
326 proteomics studies even though Araport11 was released in 2017 (Cheng et al., 2017) and  
327 TAIR10 in 2010 (Lamesch et al., 2012). In addition, we added all other Arabidopsis (Col-0)  
328 sequences from the universal databases UniProtKB and RefSeq because these are widely used  
329 sequence resources. To help identify proteins not represented (or with alternative proteoforms)  
330 in these four main resources, we also included sequences generated by individual labs,  
331 including a large set of small Open Reading Frames (sORFs) (Hazarika et al., 2017), as well as  
332 the predicted protein sequences for 950 Araport11 pseudogenes. These pseudogenes are  
333 assumed to be untranslated, but we did previously find evidence that some do appear to  
334 produce stable proteins (van Wijk et al., 2021). We also updated the set of the plastid- and  
335 mitochondrial-encoded proteins to address redundancies and mistakes in plastid- and  
336 mitochondrial ATGC and ATMG sequences, and to allow a systematic analysis of non-  
337 synonymous RNA editing for plastid- and mitochondrial encoded proteins. In a forthcoming  
338 study (van Wijk et al, in preparation), we will provide detail on the annotation and redundancy of  
339 plastid- and mitochondrial encoded proteins, the expression of organellar ORFs, and the impact  
340 of RNA editing. Table 2 shows the number of sequences for each sequence data set, their  
341 overlap and unique protein sequences.

342

343 ***Protein identification, sequence coverage, PTMs and overall statistics in build 2*** The 115  
344 selected PXDs contained 259.4 million raw MSMS spectra from 10478 MS runs that we  
345 searched as 369 different experiments (Tables 3 and Supplemental Data Set S1). We assigned  
346 these experiments based on the metadata associated with the PXDs, as well as associated  
347 publications. Importantly, this involved manual evaluation of experimental conditions, sample  
348 preparations and proteomics and MS workflows; this is a relatively time-consuming process  
349 requiring specific expertise which is currently hard to automate. This allowed us to search with  
350 appropriate parameters (parameters need to be assigned for specific PTMs, protease cleavage  
351 reagents, iTRAQ, TAILS, COFRADIC) and also to associate the most relevant biological (e.g.  
352 dark vs light treatments) and technical metadata. The associated metadata will facilitate  
353 discoveries of biological relevance (e.g. condition or cell-type specific accumulation patterns, the

354 relation between alternative splicing and plant material), but also to analyze for technical  
355 features (e.g. sample-handling related PTMs such as off-target effects of iodoacetamide (Hains  
356 and Robinson, 2017; Muller and Winter, 2017) or trypsin artefacts (Schittmayer et al., 2016; Niu  
357 et al., 2020)

358 In total there were 70.5 million peptide-spectrum matches (PSMs) to nearly 0.6 million  
359 distinct peptides, thereby identifying 18267 Araport11 proteins at the highest confidence level  
360 (canonical proteins, two uniquely mapping non-nested peptides of  $\geq 9$  residues and with  $\geq 18$   
361 residues of total coverage) and 1856 'uncertain' proteins (too few uniquely-mapping peptides of  
362  $\geq 9$  aa to qualify for canonical status and may also have one or more shared peptides with other  
363 proteins) and 1540 'redundant' proteins (containing only peptides that can be better assigned to  
364 other entries and thus these proteins are not needed to explain the observed peptide evidence)  
365 (Table 3). The overall FDR of the PSMs was 0.08%. The 'uncertain' proteins are needed to  
366 explain all the peptides identified above threshold, while 'redundant' identifications have only  
367 peptides that already map to canonical or uncertain proteins – for more details on these  
368 definitions see (van Wijk et al., 2021). These 'redundant' proteins typically have significant  
369 sequence homology to these canonical proteins. Table 4 shows the breakdown of identifications  
370 at different confidence levels for each of the five nuclear chromosomes, as well as the plastid  
371 and mitochondrial genomes. The percentage of identified predicted proteins per nuclear  
372 chromosome was on average 78.6% with only small differences between chromosomes. We  
373 identified nearly all predicted mitochondrial and plastid proteins and ORFs (91% and 95%,  
374 respectively); the few unobserved organellar proteins are either untranslated ORFs (likely  
375 pseudogenes) or very small proteins. In summary, build 2 has peptides mapping to 78.6%  
376 (21663/27559) of all predicted proteins in Araport11 (counting only one isoform per gene). The  
377 complete sets of identified proteins in their respective confidence tiers can be downloaded at  
378 <https://peptideatlas.org/builds/arabidopsis/>

379 In addition, there were 4342 peptides only matching to proteins in sources other than  
380 Araport11 with a total of 1.8 million PSMs (Table 5). These peptides were assigned to proteins  
381 by hierarchy of sources (ranked from 1 to 11), with each peptide assigned only to the highest-  
382 ranking source possible and then not to any other source. Table 5 also summarizes how many  
383 of these non-Araport11 proteins were identified when applying different thresholds for the  
384 minimum number of PSMs and matched peptides. For example, when requiring at least 2  
385 distinct peptides with each at least 3 observations (PSMs) there are 25 proteins identified in  
386 TAIR10 and nine pseudogenes, as well as 6 small proteins (LW or sORFs) from the ARA-PEP  
387 database. Supplemental Data Set S3 provides more information on these proteins not found in

388 Araport11. These matched pseudogenes and non-Araport11 proteins should be considered for  
389 incorporation into the next Arabidopsis genome annotation. Finally, what this Table 5 also  
390 demonstrates is that samples also contain various contaminants (e.g. keratins from human skin,  
391 trypsin for auto-digestion, BSA), as expected based on observations in other large-scale studies  
392 (Hodge et al., 2013; Frankenfield et al., 2022).

393 Build 2 contains more than double the number of PXDs as build 1, and 68% more raw  
394 MSMS spectra were searched (Table 3). Whereas the number of PSMs increased by 78%, the  
395 number of distinct identified peptides only increased by 11% and the number of identified  
396 proteins (across all confidence levels) increased by just 1% (Table 3). Figure 2A shows the  
397 cumulative identified peptides as well as distinct peptides from the 369 experiments (each PXD  
398 can have more than one experiment), whereas figure 2B shows the cumulative identified  
399 canonical proteins as well as distinct canonical proteins from the experiments. This shows that  
400 even though we deliberately selected PXDs to enrich for underrepresented proteins, this did  
401 only incrementally increase peptide and protein discoveries, despite the near doubling of  
402 matched PSMs. This clearly suggest that identification of the remaining 21% of the predicted  
403 proteome will require new approaches.

404 To better understand possible underlying causes for these diminished returns, we  
405 investigated the relationships between number of matched spectra and identified distinct  
406 peptides or proteins for each PXD. This showed a wide PSM match rate for searched spectra  
407 between PXDs ranging from 1% to 74% (Table 1) mostly due to differences in spectral quality  
408 (due to e.g. peptide abundance, instrument settings and sensitivities, sample preparation), but a  
409 strong positive linear correlation between the number of matched spectra and identified distinct  
410 peptides or distinct proteins (Supplemental Figures S1,2). Interestingly, plotting the % of  
411 matched spectra to identified distinct peptides or proteins showed a clear saturation (or  
412 diminished return) suggesting bottlenecks in the dynamic range for protein identification  
413 (Supplemental Figures S1,2). This suggests that dramatic innovations in mass spectrometry  
414 and/or proteomics workflows and sample selection are needed to identify the remaining 21.4%  
415 of the predicted proteome.

416

417 **Mapping biological PTMs; N-terminal and lysine acetylation, phosphorylation and**  
418 **ubiquitination** We selected multiple PXDs that specifically enriched for the physiologically  
419 important PTMs of phosphorylation, N-terminal acetylation, lysine acetylation or ubiquitination  
420 (Table 1). A sophisticated PTM viewer in PeptideAtlas allows detailed examination of these  
421 PTMs, including direct links to all spectral matches. PTM identification rates strongly depend on

422 the confidence level (minimal probability threshold) of PTM assignment. We limited our  
423 summary in this publication on PTMs to canonical proteins, but PTMs for all confidence levels of  
424 protein identification are available in the PeptideAtlas web interface. Here we used localization  
425 probability  $P \geq 0.95$  from PTMProphet (Shteynberg et al., 2019) for each PTM, and also required  
426 at least 3 PSMs for a specific PTM at a specific residue to be included in the overall statistics. In  
427 general, higher numbers of repeat observations (PSMs) for a specific PTM at a residue improve  
428 the reliability of the assignment. Conversely, peptides with high PSM counts (*e.g.* hundreds or  
429 more) for which the vast majority (*e.g.* 99%) of peptide do not have a reported PTM at  $P > 0.95$ ,  
430 are possibly false discoveries. We recommend therefore to use the PeptideAtlas to evaluate  
431 specific PTM sites if these are of particular interest to the reader. We evaluated the results for  
432 false positives and possible pitfalls in various ways, including spot checking matched spectra  
433 and proteins to which PTMs were mapped. Supplemental Data Sets S4-S7 provide the results  
434 for these four PTMs and Supplemental Data Set S8 provides the combined results of these  
435 PTMs per canonical protein to analyze for possible cross-talk between PTMs. We briefly  
436 summarize the results below:

437       **N-terminal acetylation (NTA)** Proteins are synthesized with an initiating N-terminal  
438 methionine which can be N-terminally acetylated. However, a large portion of cellular proteins  
439 undergo removal of the initiating methionine residue by methionine amino peptidases (MAPs) if  
440 the side chain of the second residue is small enough (Giglione et al., 2004; Ross et al., 2005). If  
441 the N-terminal methionine is removed, NTA can occur on the 2nd residue of the predicted  
442 protein. Both methionine removal and NTA are co-translational processes that occur in the  
443 cytosol and plastids (Willems et al., 2021; Meinnel and Giglione, 2022; Pozoga et al., 2022).  
444 However, nuclear-encoded proteins synthesized in the cytosol and then sorted into chloroplasts,  
445 can undergo post-translational NTA after removal of the cleavable chloroplast transit peptide  
446 (cTP) by several N-terminal acetyltransferases (NATs) in the chloroplast (Meinnel and Giglione,  
447 2022; Pozoga et al., 2022) Indeed, intra-chloroplast NTA has been documented by several  
448 studies mostly involving N-terminal labeling with stable isotopes followed by fractionation  
449 (TAILS, SILProNAQ, COFRADIC) (Dinh et al., 2015; Rowland et al., 2015; Bienvenut et al.,  
450 2020; Willems et al., 2021) and won't be further addressed in this study. The presence of NATs  
451 in the nucleus (NAA50), ER (NAA50) and plasma membrane (NAA60) allows for additional post-  
452 translational NTA after sorting to these respective subcellular locations (Pozoga et al., 2022),  
453 thus adding to the complexity of NTA patterns. Finally, proteins sorted to mitochondria with  
454 cleavable N-terminal sorting signals typically do not accumulate with an acetylated N-terminus  
455 (Huang et al., 2009) and indeed no NAT has been reported to localize to mitochondria. When

456 peptides are identified matching to the initiating methionine or the immediate downstream  
457 residue of a protein, this is important support for the lack of cleavable N-terminal sorting signals  
458 (because the sorting and cleavage process and subsequent degradation of the cleaved signal  
459 peptide is typically very efficient).

460 After removal of false positives (see below), the search process identified 3185  
461 Araport11 canonical proteins (including 18 chloroplast- and 5 mitochondrial-encoded proteins)  
462 containing 3258 NTA sites mostly at position 1 (M) or position 2, and the remainder further  
463 downstream (Supplemental Data Set S4). 98% of these NTA proteins contained a single NTA  
464 site. The 2% of cases where more than one NTA site per protein was found could be due to  
465 alternative splice forms or translation start sites (Willems et al., 2021), proteins sorted to one or  
466 more subcellular location or false discovery of the PTM (there is no known sample preparation  
467 induced NTA). Interestingly, we found 30 false positive NTAs in four (iso)leucine-repeat  
468 peptides (sequences: IIIIIIIII or VIIIIII or VIIIIII or VVLLIIL matching to 27 canonical proteins).  
469 [Acetyl]-V has an identical mass as [Formyl]-L or I (L and I are isobaric) and these false  
470 positives stem from this misassignment. Formylation can occur at any peptide N-terminus (and  
471 the side chain of T and S) and is a common PTM induced by formic acid (even at low  
472 concentrations) (Zybailov et al., 2009; Kim et al., 2016). We also noted false positives due to  
473 combinatorial (assigned or real) mass modifications, involving deamidation (+0.98402 Da),  
474 carbamylation (+43.00582 Da) and C12/C13 isotopes (+1 Da), especially when the assigned  
475 NTA (+42.01056 Da) was observed with an absolute low number of PSMs or a relative low  
476 number of PSMs compared to the total number of PSMs for that peptide (for highly abundant  
477 proteins).

478 There were 1493 nuclear-encoded canonical proteins with matched peptides starting  
479 exclusively with the initiating methionine, of which 1164 were observed with NTA. There were  
480 2810 nuclear-encoded canonical proteins with matched peptides starting exclusively at position  
481 2, of which 1912 were observed with NTA. These acetylated residues were mostly for proteins  
482 without predicted N-terminal signal peptides (sP, cTP or mTP). We created sequence logo plots  
483 for each of these four groups (Figure 3A-D) to show the methionine amino peptidase activity (to  
484 remove the initiating M) and the NAT activity. The logos show that proteins that retain the  
485 methionine have mostly the acidic amino acids residues (D,E) and N in the 2nd position (Figure  
486 3A). NTA occurs on the initiating M (Figure 3C), as well as on A,S,V,G (Figure 3D). The iceLogo  
487 (Maddelein et al., 2015) (Figure 3E) comparing the sets in panel B and D shows that the  
488 dominant NAT activity for this set of identified proteins is to acetylate A and S residues. NTA is  
489 the result of the activity of multiple NATs each with their own set of preferred substrates and

490 NATA has been reported to be responsible for N-terminal acetylation of ~50% of the plant  
491 proteome (Pozoga et al., 2022).

492 **Lysine acetylation** Identification of K-acetylation required a targeted search that was  
493 applied on the raw files from three PXDs with enriched lysine acetylome samples from the  
494 Finkemeier lab (PXD006651, PXD006652, PXD007630) (Table 1). After application of our post-  
495 search selection criteria (PTM localization  $P > 0.95$ ;  $\geq 3$  PSMs per PTM site) and removal of  
496 false positives, we identified 864 core canonical proteins containing K-Acetyl modifications  
497 representing 1750 K-sites (Supplemental Data Set S5). 512 proteins (59%) contained a single  
498 K-acetyl site whereas others are more heavily K-acetylated. The acetylated proteins were  
499 distributed across multiple subcellular locations and functions supporting recent findings in  
500 Arabidopsis (Tilak et al., 2023), but also other plant species (Zhang et al., 2022), the green  
501 algae *Chlamydomonas reinhardtii* (Fussl et al., 2022) as well as the moss *Physcomitrium*  
502 *patens* (Balparada et al., 2022)

503 **Phosphorylation** After application of our post-search selection criteria (PTM localization score  
504  $P > 0.95$ ;  $\geq 3$  PSMs per PTM site), there are 5198 canonical phosphoproteins (p-proteins)  
505 representing 14748 phosphosites (p-sites) (86% S, 13% T, 0.6% Y) (Supplemental Data Set  
506 S6). 45% of the 5198 p-proteins contained only a single p-site, and 20%, 11% and 7%  
507 contained 2, 3 or 4 p-sites, respectively. This ratio between pS, pT and pY is consistent with  
508 published literature for large scale phosphorylation data sets in Arabidopsis (van Wijk et al.,  
509 2014; Mergner et al., 2020).

510 **Ubiquitination** We found 668 ubiquitinated core canonical proteins based on 765 single K-  
511 glycine (KG) sites (Walton et al., 2016) and 412 K-diglycine (KGG) sites (Grubb et al., 2021),  
512 totaling 1177 ubi-sites (Supplemental Data Set S7). The two PXDs that contained enriched  
513 ubiquitinated sites were from large scale studies (Walton et al., 2016; Grubb et al., 2021) that  
514 applied different methods (resulting in K-G or K-GG) to identify the ubiquitinated sites. 449  
515 proteins (67%) contained a single G or GG PTM site. By far the most PSMs for G or GG were  
516 found for nine ubiquitin (extension) proteins ( $>1000$  PSMs), followed (albeit at far lower PSM  
517 levels) by several plasma membrane proteins and histones. We note that there are no  
518 mitochondrial-encoded proteins and one chloroplast-encoded protein  
519 PeptideAtlas\_ATCG00900.1 (30S ribosomal protein S7A/B) with just three PSMs for one site  
520 (K13-G). 45 sites across 18 proteins exhibited both a Gly and a GG PTM. Since the G and GG  
521 studies were independent, this might indicate that these sites have a lower FDR than sites  
522 which were only detected by one of the methods. These 18 proteins are the nine ubiquitin or  
523 ubiquitin extension proteins which is logical since they form polyubiquitination chains. The



524 others are abundant glycolytic enzymes (aldolases), cytosolic ribosomal proteins, an elongation  
525 factor involved in cold-induced translation (LOS1)(Guo et al., 2002), the SNARE protein  
526 AtVAM3p (Sanderfoot et al., 1999), and two enzymes involved in amino acid metabolism  
527 (Supplemental Data Set S7). It is perhaps not surprising that there was so little overlap between  
528 ubiquitination sites between these two studies because ubiquitination is generally a transient  
529 PTM, and in case of polyubiquitination this leads to rapid degradation. Furthermore, plant  
530 materials, sampling and methodologies were very different across these two studies.

531 **Summary of the PTMs** All together, we identified 5764 proteins with one or more of  
532 these four PTMs (NTA, Kac, P, or UBI) based on 0.582 million PSMs for 17675 PTM sites  
533 (Supplemental Data Set S8). 4952 proteins contain only one type of PTM, 635 proteins contain  
534 two types of PTMs, 160 proteins contain three types of PTMs, and 17 proteins contain all four  
535 types of PTMs.

536 In addition to these physiological PTMs (which require specific affinity enrichment,  
537 except for N-terminal acetylation), the MS searches also include additional mass modifications,  
538 many of which are induced during sample processing (see Materials and Methods). The  
539 frequencies of these can greatly vary between PXDs and experiments within PXDs depending  
540 on the use of organic solvents, urea, oxidizing conditions, temperature, pH and use of SDS-  
541 PAGE gels. These mass modifications are included in the search parameters since many of  
542 these modified peptides would otherwise not be identified or lead to false assignments.  
543 However, we do not report on these statistics as they have generally very little physiological  
544 relevance. These mass modifications are all available in the PeptideAtlas web interface with  
545 viewable spectra and they can be investigated to better understand the impact of different  
546 sample treatments.

547  
548 **Understanding the nature of the unobserved proteomes in the new release of**  
549 **Arabidopsis PeptideAtlas** Of the 27559 predicted nuclear and organelle protein coding genes  
550 of the Arabidopsis in Araport11, we identified 18267 (66.3%) corresponding proteins as meeting  
551 the canonical criteria (canonical proteins) and 5896 proteins (21.3%) having no observations at  
552 all (dark proteins) in our PeptideAtlas build. The remaining identified proteins are in the  
553 uncertain or redundant categories. Our working hypotheses is that the dark proteins are not  
554 observed because they: i) are generally expressed at too low levels for detection, ii) are  
555 expressed only under very specific conditions or in specific cell types, iii) have very short half-  
556 life, iv) have physicochemical properties (very small and/or very hydrophobic) that make them

557 difficult to detect using standard proteomics and mass spectrometry workflows (van Wijk et al.,  
558 2021), or v) simply not translated at all under any conditions.

559 Figure 4A displays the histograms of molecular weight (between 0 and 80 kDa) for the  
560 canonical and dark proteins. Figure 4B displays the relative proportion of canonical and dark  
561 proteins in each kDa bin. Below 4 kDa all proteins are dark proteins. Between 14 and 16 kDa,  
562 ~50% of the proteins are canonical and ~50% are dark. With increasing molecular weight, the  
563 proportion that are canonical proteins increases to ~90%. There are a substantial number of  
564 proteins above 80 kDa, but the proportion of proteins that are canonical is generally constant  
565 above 80 kDa at ~95%. Figure 4C,D displays the distribution of hydrophobicity computed as the  
566 gravy score based on the algorithm of Kyte and Doolittle (Kyte and Doolittle, 1982). Values above  
567 0 are considered hydrophobic, with values above 0.5 being very hydrophobic. Figure 4C shows  
568 the absolute number of proteins per bin, whereas panel 3D shows the relative proportion of  
569 canonical and dark proteins per bin. The two distributions are broadly similar between gravy  
570 scores -2.0 to +0.8, with a sharp decline in the proportion of canonical proteins above a gravy  
571 score of +0.8. All 64 proteins with a gravy score greater than +1.0 are dark (*i.e.* undetected) and  
572 most of these proteins are small with a predicted signal peptide for secretion to the ER.  
573 Furthermore, most have no known function, but also include seven arabinogalactan proteins  
574 (AGPs) (Silva et al., 2020) and four plasma membrane RCI2 proteins (Medina et al., 2007).  
575 Figure 4E,F displays the distribution of isoelectric point (pI) for proteins. Both canonical and dark  
576 proteins exhibit the typical bimodal distributions peaking at just below 6.0 and again just above  
577 9.0 based on their total counts (Figure 4E). The distribution in the relative proportion of  
578 canonical to dark proteins is complex (Figure 4F), but in general, the proportion of canonical  
579 proteins is substantially reduced at the two extremes. Very basic proteins (pI) are enriched for  
580 ribosomal proteins and 'hypothetical' proteins.

581 In addition to these inherent properties of the canonical and dark proteins, we also  
582 explored the distributions of computed RNA abundances of the transcripts across 5,673 single  
583 and paired-end RNA-seq quality-controlled and filtered datasets from (Palos et al., 2022) with  
584 reads aligned to the Arabidopsis genome (see Materials and Methods). We excluded 345  
585 protein coding genes that were never expressed above the median, as well as 309 undetected  
586 genes from the remaining analyses which were likely undetected due to mapping limitations with  
587 overlapping or highly similar genes (Supplemental Data Set S2). To evaluate mRNA expression  
588 patterns for the canonical and dark proteins, we considered two metrics, *i.e.* the percentage of  
589 RNA-seq data sets in which the transcript for a gene was detected (Figure 5A,B) and the  
590 maximum transcripts per million (TPM) for each expressed gene in any one of the RNA-seq

591 data sets (Figure 5C,D). Figure 5A displays the distribution of the percentage of the 5673 RNA-  
592 seq datasets in which each transcript was detected. The highest bin (99-100%) is truncated at  
593 1000 genes to better show details of the other bins (the true height of this highest bin is 12000).  
594 The relative proportions of canonical and dark proteins in each transcript bin are more easily  
595 seen in the proportion plot (Figure 5B) which shows that the proportion increases linearly across  
596 most of the range of transcript detection, except for the extremes at the ends. In other words,  
597 the more often a transcript for a gene is detected in one of the RNA-seq datasets, the higher the  
598 chance that the protein is canonical. For genes where this RNA detection percentage was below  
599 ~5%, the predicted protein was typically not detected (*i.e.* dark), whereas for genes where the  
600 transcript was detected in >98% of the RNA-seq datasets, the predicted protein was nearly  
601 always canonical. Figure 5C depicts the distribution of the highest TPM among the analyzed  
602 RNA-seq experiments for each of the canonical and dark proteins. The TPM values extend as  
603 high as 207,000 (for seed storage protein albumin 3 - At4G27160) but the proportion does not  
604 change substantially above 100 TPM, and we only depict the range 0 to 500 TPM. Clearly the  
605 proportion of dark proteins rapidly increases when the maximum TPM falls below ~100 TPM,  
606 suggesting that transcript abundance is likely influencing the detectability of proteins in MS  
607 analyses.

608

609 **Machine learning models to predict and understand MS-based detection of Arabidopsis**  
610 **proteins** Figures 4 and 5 showed that each of the protein and RNA attributes has a substantial  
611 influence on whether proteins are canonical or dark. Taking advantage of these attributes to  
612 better understand why these dark proteins are not observed, we trained both an artificial neural  
613 network (ANN) model and a random decision forest (RDF) model for the canonical and dark  
614 proteins based on physicochemical protein properties and RNA expression patterns. The  
615 quantitative output of these models was the probability for proteins to be canonical. The starting  
616 point was a table of 18079 nuclear-encoded canonical proteins and 5595 nuclear-encoded dark  
617 proteins for a total of 23674 proteins (uncertain and redundant proteins are left out for the  
618 training of the models; proteins without RNA values are also left out), as well as the computed  
619 physicochemical and RNA attributes discussed above. Figure 6 shows the receiver operating  
620 characteristic (ROC) curves to visualize the RDF (A,B) and the ANN (C,D) model performances  
621 trained on each of the features individually and collectively. ROC curves measure the ability of  
622 the model to distinguish between canonical and dark proteins. Figure 6E shows that the %  
623 detected transcript made the most important contribution to the RDF model followed by highest  
624 TPM and molecular weight. The overall accuracy of the RDF model when trained on all

625 attributes was slightly better to the ANN model with area under the curve (AUC) values of 0.94  
626 vs 0.91. Both the RDF and ANN models were robust as their ROC curves did not depend on  
627 which subset of the input data was used for training (Figure 6C,D). Supplemental Data Set S9  
628 provides the protein and RNA features (input) for the models as well as the output (probability to  
629 be canonical).

630 Even though the AUCs in the ROC curves were high, there is a substantial number of  
631 predicted canonical proteins that were in fact dark proteins and vice versa. To better understand  
632 possible reasons for these false predictions (outliers), we assembled two sets of outliers using  
633 the combined outcomes of both machine learning models, as follows: For dark protein outliers  
634 (predicted to be canonical, but dark), we required that both models calculated a probability (to  
635 be canonical) of  $>0.80$ ; this resulting in 222 outliers. These outlier dark proteins had average  
636 physiochemical properties (47 kDa,  $-0.4$  Gravy, 7.3 pI) and moderate average RNA expression  
637 values (96% RNA detected, highest TPM 361). Hence these undetected proteins appeared to  
638 have favorable properties (not very low molecular weight, not hydrophobic, not very basic and  
639 significant transcript levels and detection across RNA-seq datasets), yet were not detected by  
640 MS. For canonical protein outliers (predicted to be dark, but canonical) we required that both  
641 models calculated a probability (to be canonical) of  $<0.20$ ; this resulted in only 42 outliers; these  
642 outliers had the average physiochemical properties of 24 kDa MW,  $-0.3$  Gravy, 7.9 pI and low  
643 average RNA expression values (19% RNA detected, highest TPM 33). Hence these  
644 unexpected canonical proteins have very low transcript levels and were often not detected in  
645 RNA-seq experiments yet were detected at high confidence levels. We then further explore the  
646 underlying scenarios for this unexpected behavior based on functional annotations and manual  
647 inspection, as described in a section further below (*Explanations for unexpected canonical or*  
648 *dark proteins*).

649  
650 ***Biological properties and functions of the dark proteome*** Based on the description of the  
651 proteins in TAIR, we observed that proteins annotated as 'hypothetical proteins' (some have  
652 DUF domains) were highly overrepresented at 24% of all dark proteins (1349 out of 5595),  
653 compared to just 2.6 % of the canonical proteins (476 out of 18079) (Figure 7A). These  
654 hypothetical proteins are annotated in TAIR as 'protein coding' and not as pseudogenes. On  
655 average, the predicted observability to be canonical for these hypothetical proteins was indeed  
656 much lower for the dark proteins than the canonical proteins (Figure 7B). Proteins annotated as  
657 'unknown' and/or proteins with a DUF domain' represented 5% of the dark proteins and 4.3% of  
658 the canonical proteins (Fig. 6A), thus lacking this overrepresentation in dark proteins.

659 To take an unbiased approach to determine if the dark proteome is enriched for  
660 particular types of proteins, we used the Arabidopsis Gene Ontology (GO) enrichment analysis  
661 (Ashburner et al., 2000; Ge et al., 2020; Gene Ontology, 2021) for the three GO categories  
662 Biological Process (BP), molecular function (MF) and cellular component (CC). GO analysis  
663 was done by comparing all dark proteins to either the sum of canonical and dark proteins or all  
664 predicted Araport11 proteins; the results were similar for both comparisons, and we show  
665 therefore the results of the latter. We did not observe any significant enrichment for the CC  
666 categories suggesting that the build #2 did not under-sample any particular subcellular  
667 localization. Indeed, the PXDs that are included in build #2 deliberately include all plants parts,  
668 and most subcellular fractions such as chloroplasts, mitochondria, etc. However, significant  
669 enrichment was observed for BP and MF with the 20 most significant GO terms (lowest FDR)  
670 for BP or MF shown in figure 7A,B. A protein can have several GO terms for each category and  
671 different GO terms can relate to similar processes or functions (Supplemental Data Set S10).  
672 There were 520 proteins in the top20 GO terms for BP and 739 proteins for the top20 GO terms  
673 for MF, with 271 found in both.

674 Upon analysis of the enriched BP GO terms (Figure 8A) and the protein IDs, we  
675 determined that there are mainly three broad types of protein functions enriched in the dark  
676 proteome. These are: i) 149 signaling peptides/peptide hormones such as members of the  
677 clavata family, defensins, root meristem growth factor (GO terms: Cell signaling (involved in cell  
678 fate commitment), Cell-Cell signaling, Cell fate commitment, Signaling receptor activity,  
679 Signaling receptor binding, Regulation of asymmetric cell division, nitrate import, cell killing,  
680 killing of other cells of other organisms, phloem development, regulation of cell differentiation),  
681 ii) ~236 proteins involved in the ubiquitination pathway, including 160 E3 ligases, one E2  
682 conjugating enzyme, 8 ubiquitin(-like) proteins (Go terms: Protein ubiquitination, protein  
683 modification by small conjugation (or removal), Ubiquitin(-like) protein ligase activity, Positive  
684 regulation of (proteasome) ubiquitin-dependent protein catabolic process), iii) ~130 proteins  
685 associated with DNA & RNA related processes (GO terms: RNA/Nucleic acid phosphodiester  
686 bond hydrolysis (endonucleolytic), RNA-dependent DNA biosynthetic process, DNA biosynthetic  
687 process). Many of these proteins belong to superfamilies such as: RNA-directed DNA  
688 polymerase (reverse transcriptase)-related family (it is not clear what function these have in  
689 Arabidopsis), non-LTR retroelement reverse transcriptase, reverse transcriptase zinc-binding  
690 protein, Polynucleotidyl transferase ribonuclease H-like superfamily, ribonuclease H superfamily  
691 polynucleotidyl transferase. Many of these proteins seem to have no defined function.

692 Analysis of the top 20 enriched MF GO terms (Figure 8B) showed 115 UBI-related  
693 proteins and 70 signaling peptides as in the BP GO analysis above. But transcription factor  
694 proteins represent by far the most enriched molecular function, with a total of over 400 members  
695 of different TF families (e.g. AP2/EREBP, ARF, Auxx/IAA, bHLH, bZIP, C2C2(Zn), C2H2, MADS  
696 box, MYB, CCAAT, WRKY) (GO terms: DNA-binding transcription factor activity, Transcription  
697 factor binding, RNA polymerase II cis-regulatory region sequence-specific DNA binding, Cis-  
698 regulatory region sequence-specific DNA binding, RNA polymerase II transcription regulatory  
699 region sequence-specific DNA binding, DNA-binding transcription factor activity, RNA  
700 polymerase II-specific, DNA-binding transcription factor activity). The 2<sup>nd</sup> largest molecular  
701 function was for various endonuclease activities with ~83 proteins, including several types of  
702 reverse transcriptases and ribonuclease H family members (GO terms: Endonuclease activity,  
703 Endonuclease activity, active with either ribo- or deoxyribonucleic acids and producing 5 -  
704 phosphomonoesters, Ribonuclease activity, Endonuclease activity, RNA-DNA hybrid  
705 ribonuclease activity). Finally, there were 27 proteins associated with the GO terms RNA-  
706 directed DNA polymerase activity and DNA polymerase activity; most of these were also  
707 annotated as reverse transcriptases.

708

### 709 ***Signaling peptides/peptide hormones are highly over-represented in the dark proteome***

710 The GO enrichment analysis (Fig. 8A,B) suggested that proteins encoding for plant signaling  
711 peptides and/or peptide hormones are strongly overrepresented in the dark proteome. Most are  
712 inactive precursors (preproteins of ~7 to ~12 kDa) that undergo a multistep proteolytic  
713 processing to result in the relatively small (between ~5 and ~100 amino acids) bioactive peptide  
714 signals (Matsubayashi, 2014; Tavormina et al., 2015; Olsson et al., 2019; Stintzi and Schaller,  
715 2022). These small proteins are of great importance in many aspects of plant life. Most of these  
716 precursors are secreted through a cleavable N-terminal signal peptide (sP) for targeting into the  
717 ER, followed by traveling through the Golgi, plasma membrane and into the apoplast. However,  
718 the mode of bioactive peptides can be extracellular or intracellular. We note that there are also  
719 bioactive peptides derived from different types of short open reading frames (sORFs, uORFs,  
720 lncRNA, pri-miRNA), most of which do not yet have an ATG identifier in the current TAIR  
721 annotation (Takahashi et al., 2019; Hu et al., 2021). Bioactive plant peptides have traditionally  
722 been grouped into (i) cysteine-rich peptides that form internal disulfide bonds, and (ii) post-  
723 translationally modified small peptides that undergo one or more PTMs during their passage  
724 through the ER or Golgi (e.g. tyrosine sulfation (Kaufmann and Sauter, 2019), proline  
725 hydroxylation, etc) (Matsubayashi, 2014; Olsson et al., 2019).

726 Many peptide families have been recognized (Matsubayashi, 2014; Olsson et al., 2019;  
727 Kim et al., 2021; Stintzi and Schaller, 2022), including Clavata/embryo-surrounding region (CLE)  
728 (Willoughby and Nimchuk, 2021; Yuan and Wang, 2021), Epidermal Patterning Factor (EPF)  
729 (Yuan and Wang, 2021), phytosulfokine-alpha (PSK) (Matsubayashi, 2014), cysteine-rich  
730 peptides of the LURE family (Zhong et al., 2019), Embryo Surrounding Factor (ESF), PAMP-  
731 induced secreted peptides (PIP), Plant Peptides containing Tyrosine sulfation family (PSY)  
732 (Tost et al., 2021), root meristem growth factor (RGF), caesarian strip integrity factor (CIF)  
733 (Fujita, 2021), inflorescence deficient in abscission (IDA), precursor of plant elicitor peptide  
734 (PROPEP) (Huffaker et al., 2006; Bartels et al., 2013), defensin-like (DFL) and POLARIS which  
735 is not part of a larger family. We assembled a tentative list of their protein ATG identifiers (330  
736 genes) to get a better understanding to what extent they were identified in the new PeptideAtlas  
737 build (Supplemental Data Set S11). PeptideAtlas identified 92 (28%) at the canonical level and  
738 144 (44%) were part of the dark proteome (Figure 10A). The remainder of these 330 proteins  
739 were identified at various lower confidence levels often as part of a group of homologs (48  
740 weak, 2 insufficient evidence, 14 subsumed, 14 marginally distinguished, 6 indistinguishable  
741 representative) (Figure 9A). The identification level within each family (Fig. 9B,C) shows that the  
742 majority of members of some families were identified at the canonical level (PEP, CAP, LTP and  
743 THIONIN), whereas the identification rate in other families was very low (CIF, CLE, CEP, EPF,  
744 IDA, PAMP, PSY, RTFL/DVL, RGF) with >64% members unobserved (dark). The correlation  
745 between average (or median) precursor length for each family and identification status is weak.  
746 This is logical because these proteins are synthesized as precursors followed by one or more  
747 proteolytical cleavages. Furthermore, for family members decorated with PTMs on the amino  
748 acid residues Y, S or P (see Figure 9B) identification rates should be lower since our database  
749 search does not include these PTMs because they are relatively rare. Inclusion of such PTMs in  
750 regular searches is not appropriate and would result in many false discoveries.

751 Interestingly, PSMs of the identified proteins ranged from just a few to several thousand  
752 for several LTP family members (LPT1,2,3,4) and DEF members (PDF1.1, 1.2A/B/C. 1.3).  
753 Sequence coverage was > 60% for some 22 preproteins, including several THIONINS, CAPs  
754 and a few PEPs; further close inspection of the matched peptides in PeptideAtlas showed that  
755 the sequence coverage started downstream of the cleavable signal peptide and mostly or  
756 completely included the predicted C-termini. More biological insight into the accumulation and  
757 maturation of these signaling peptides can be derived by exploring the associated metadata  
758 (stored and linked in PeptideAtlas) and relate that to identification status, protein coverage and  
759 abundance as measured by PSMs in PeptideAtlas. Identifications of the unobserved and low

760 confidence peptides will require targeted experimental approaches, and specific search  
761 strategies (e.g. allowing for specific PTMs).

762

763 ***E3 ligases are highly over-represented in the dark proteome*** The GO enrichment, and  
764 inspection of the associated protein IDs, showed that E3 ligases were over-represented in the  
765 dark proteome. Arabidopsis has some ~1400 E3 ligases that each target one or several  
766 substrates for polyubiquitination and subsequent degradation by the proteasome. The required  
767 amount of an E3 ligase in a cell greatly depends on the number and abundance of its  
768 substrates. The dark proteome included 601 E3 ligases (10.7% of the dark proteome) whereas  
769 the canonical proteome included 429 E3 ligases (2.4% of the canonicals). Comparing the dark  
770 and canonical E3 ligases shows that these 2 groups do not differ in the three physicochemical  
771 properties (size, gravity, pI) but that dark proteins have on average much lower transcript levels  
772 (both TPM and % observed).

773

774 ***Proteins with short half-life or extensive proteolytic processing - protein features not***  
775 ***considered in the machine learning*** There are two protein features (attributes) that were not  
776 considered in the machine learning models. These features are i) proteolytic trimming of the  
777 preproteins or (pre)proteins, and ii) short protein half-life resulting in net low abundance  
778 under most conditions. Both scenarios make it harder to detect such proteins by MSMS than  
779 predicted by the machine learning models. We already described examples for extensive  
780 proteolytic trimming for plant signaling peptides/peptide hormones which are indeed  
781 overrepresented in the dark proteome.

782 Proteins that are predicted to be canonical but with a conditional short-half life might go  
783 undetected (dark proteins) or with very low number of PSMs, because they are continuously  
784 degraded under most circumstances. However, the half-life of most proteins is unknown. One of  
785 the exceptions is the set of five transcription factors in the group VII of the Ethylene Response  
786 Factor (ERF-VII) family involved in oxygen sensing (Gibbs et al., 2015; van Dongen and Licausi,  
787 2015; Hammarlund et al., 2020; Weits et al., 2021; Barreto et al., 2022) (Table 6). These  
788 proteins have a short half-life under normal oxygen concentration (normoxia) because they are  
789 degraded by the proteasome through the N-degron pathway but become stabilized during  
790 hypoxia or anoxia. These proteins have a cysteine in the 2<sup>nd</sup> position from the N-terminus. After  
791 removal of the start methionine by methionine amino peptidases, these N-terminal cysteines are  
792 enzymatically oxidized by APs by Plant Cysteine Oxidases (PCDs) which is then followed by  
793 enzymatic arginylation (*i.e.* additional of an arginine residue) (White et al., 2017; Hammarlund et



794 al., 2020). The arginylated N-terminus is then recognized by specific E3 ligases, resulting in  
795 polyubiquitination and degradation by the proteasome. At low cellular oxygen concentrations  
796 (hypoxia) due to respiration or environmental conditions (e.g. flooding, high altitude), these  
797 transcription factors stabilize because the enzymatic oxidation is slowed down (Abbas et al.,  
798 2022). In Arabidopsis there are five members of this ERF-VII family, *i.e.*, hypoxia response 1  
799 (HRE1; AT1G72360), HRE2 (AT2G47520), related to apetala 2.12 (RAP2.12; AT1G53910),  
800 RAP2.2 (AT3G14230), RAP2.3 (AT3G16770).

801 Table 6 summarizes the PeptideAtlas findings and protein attributes this ERF-VII family.  
802 Whereas there was MSMS support for all five proteins, the number of PSMs was very low  
803 (between 2 and 5). All but one peptide was from callus or cell culture – callus is known to have  
804 low internal [O<sub>2</sub>] (Hammarlund et al., 2020) explaining why the proteins were observed in callus.  
805 It seems quite plausible that plant cell cultures also might experience hypoxia (due to high  
806 respiration and low/no photosynthesis). The ERVII TF proteins are predicted to be canonical  
807 (predicted observability between 0.7 and 1) (Table 6). However, only RAP2.12 was identified at  
808 the canonical level but only in one specific experiment using cell cultures (PXD013868,  
809 experiment 8213  
810 [https://db.systemsbiology.net/sbeams/cgi/PeptideAtlas/ManageTable.cgi?TABLE\\_NAME=AT\\_S](https://db.systemsbiology.net/sbeams/cgi/PeptideAtlas/ManageTable.cgi?TABLE_NAME=AT_SAMPLE&sample_id=8213)  
811 [AMPLE&sample\\_id=8213](https://db.systemsbiology.net/sbeams/cgi/PeptideAtlas/ManageTable.cgi?TABLE_NAME=AT_SAMPLE&sample_id=8213)). Furthermore, RAP2.3 was only identified with a phosphorylated  
812 peptide identified in callus and in cell cultures. Their transcripts were detected in the majority (>  
813 82%) of the 5673 RNA-seq datasets and all proteins have very high maximum TPM values  
814 (1202-7877). This is a nice example where the correlation between predicted probability to be  
815 canonical (from the machine learning models) and observed overall number of PSMs suggest  
816 unusual properties of the proteins, in this case short half-life. The associated metadata help to  
817 provide biological context as the findings for these ERF-VII proteins illustrate.

818  
819 ***Explanations for unexpected canonical or dark proteins*** A small subset of dark proteins  
820 (222 out of 5595) were predicted by both machine learning models to be canonical (p>0.8) and  
821 44 canonical proteins were predicted to be dark (p<0.2). To explore biological scenarios for  
822 these unexpected dark or canonical proteins we used both GO enrichment and manual  
823 evaluation. We compared GO distributions of the 222 dark outliers and the 5595 dark proteins  
824 (Figure 10 and Supplemental Data Set S10). The highest number of proteins were found for GO  
825 terms associated with ubiquitination (Protein ubiquitination, protein modification by small  
826 conjugation (or removal), Ubiquitin(-like) protein transferase activity, Ubiquitin(-like) protein  
827 ligase activity). Upon further inspection these were mostly E3 ligases, in particular RING

828 ligases. Other GO terms pointed to enrichment in kinases, terms associated with reproduction,  
829 DNA repair, and response to light stimulus or response to radiation, but the genes associated  
830 with these GO terms have quite broad range of functions (e.g. transcription factors, some E3  
831 ligases).

832 Because the number of unexpected dark proteins was relatively small, we explored  
833 these also manually. Two of the unexpected dark proteins were chloroplast sigma factors 1 and  
834 3 (SIG1 and SIG3; AT1G64860 and AT3G53920) with predicted probability to be canonical  
835 between 0.84 and 0.98. Both are very basic proteins (9.5 and 9.8 pI) with have relatively high  
836 molecular weight of the precursors (56 and 65 kDa) and were detected in nearly all 5673 RNA-  
837 seq data sets with the highest TPM of 383 and 105; hence it is therefore surprising that they  
838 were not detected by MSMS. Arabidopsis has six sigma factors (SIG1-6) (Chi et al., 2015;  
839 Puthiyaveetil et al., 2021) and also SIG4 and SIG5 were unobserved (but with lower  
840 probabilities to be canonical than the other sigma factors), whereas SIG2 and SIG6 were  
841 canonical. Protein sequence coverage by matched peptides for SIG2 and SIG6 were 45% and  
842 20%, respectively with 16 and 7 PSMs respectively, showing that also SIG2 and SIG6 are of low  
843 general abundance. The most logical explanation is that the half-life of all sigma factors is  
844 relatively short. Chloroplast GUN1 (AT2G31400) is a large PPR protein (100 kDa) is known to  
845 have a short half-life of just several minutes because it is degraded by the Clp chaperone-  
846 protease system (Wu and Bock, 2021). GUN1 was identified at the canonical level with 12%  
847 sequence coverage but only 9 PSMs which is relatively low given its large size and high TPM  
848 (596). These examples serve to show dark proteins with a predicted probability to be canonical  
849 are likely enriched for protein with short-half-life or have unique expression patterns.

850

851 ***Lessons from new PxDs in build 2 that contribute most effectively to identifying new***  
852 ***canonical proteins.*** To inform possible strategies to efficiently identify the remaining 21% of  
853 the predicted proteome, we evaluated which of the new PxDs that we had selected to generate  
854 the new build had the most impact. Figure 11 shows the relation between the number of  
855 identified spectra and newly identified canonical proteins (not identified at the canonical level  
856 based on earlier datasets) for each of the 63 new PxDs that we added for build 2. Six PxDs that  
857 each added the most new canonical proteins are annotated in the figure, together identifying  
858 146 new canonical proteins. Reviewing these new proteins within each of these six PxDs for  
859 protein features, including function and molecular weight, identified clear patterns consistent  
860 with sample types.

861 PXD002297 contained 120 MS runs using a Q Exactive instrument from which we  
862 matched ~18 thousand MSMS spectra yielding 9 new canonical proteins. This study used  
863 COFRADIC technology to map ubiquitination sites reporting 3,009 ubiquitination sites in 1,607  
864 proteins (Walton et al., 2016). In PXD007054 we identified only 0.11 million MSMS spectra  
865 based on 42 MS runs, but yet this resulted in 28 new canonical proteins. This study was  
866 focused on identification of SUMOylated proteins using a three-step purification protocol based  
867 on 6His-tag and anti-SUMO1 antibodies from 8-day old Arabidopsis seedlings expressing a  
868 6His-SUMO1(H89-R) transgene in wt and SUMO E3 ligase mutants *siz1-2* and *mms21-1* (Rytz  
869 et al., 2018). Interestingly, the new canonical proteins were highly enriched for transcription  
870 factors (17 out of these 28). PXD015624 provided 96 MS runs from which we matched 2 million  
871 MSMS spectra resulting in 35 new canonical proteins (Berger et al., 2020). The experiments  
872 involved label free proteomics of rosettes and roots from 8 weeks old plants and 2 weeks old  
873 seedlings of wild-type and *nfu2* plants (small and virescent) using a standard workflow (four  
874 replicates) involving protein separation by SDS-PAGE (4 slices per lane, tryptic digestion) and  
875 an Q Exactive Plus mass spectrometer. More than half of these new canonical proteins were  
876 larger proteins over 55 kDa, including five LRR kinases (98-106 kDa) and the glutamate  
877 receptor 2.3 (101 kDa). From PXD016575 we identified 0.57 million MSMS spectra and 36 new  
878 canonical proteins from 140 MS runs. The experiments involved the analysis of seedlings of wt  
879 and the autophagy-deficient mutant *atg2-2* upon consecutive, temporary reprogramming  
880 inducing stimuli ABA and flg2 (Rodriguez et al., 2020). The proteomics workflow involved SDS  
881 extracted total seedling proteomes, TMT labeling followed by SCX chromatography and  
882 standard nanoLC-MSMS using a Q Exactive instrument. The new canonical proteins from this  
883 set included 19 proteins below 20 kDa, including several RALF signaling peptides; these small  
884 proteins are often missed in SDS-PAGE separated samples. PXD019330 was a truly large-  
885 scale proteomics study sampling multiple tissue types (roots, leaves, cauline leaves, stems,  
886 flowers, siliques/seeds, whole plant seedlings) at different developmental stages (Bassal et al.,  
887 2020). A standard workflow was used involving protein separation by SDS-PAGE (5 slices per  
888 lane, tryptic digestion) and an LTQ-Orbitrap Velos instrument and notably a long C18 column  
889 (50 cm) and long (9 hrs) elution with a total of 120 MS runs. We matched 3.29 million MSMS  
890 spectra resulting in 15 new canonical proteins. These new canonicals included several  
891 chloroplast membrane proteins (FAX4 and Lil1.2), a nitrate transporter and two very small  
892 metallothioneins. PXD026180 contained 50 MS runs from four different MS instruments (LTQ, Q  
893 Exactive HF, Q Exactive, LTQ FT Ultra) from which we mapped 0.5 million MSMS spectra and  
894 yielding 21 new canonical proteins. This study analyzed purified clathrin coated vesicles (CCVs)

895 from undifferentiated Arabidopsis suspension cultured cells using both SDS-PAGE and in-  
896 solution digests, followed by nanoLC-MSMS on the extracted peptides (Dahhan et al., 2022).  
897 These six PXDs utilize a wide range of methods and plant materials, some high affinity enriched  
898 (SUMOylation, ubiquitination, CCV) and others including a range of different plant parts. As  
899 expected, several of the new canonical proteins are involved in vesicle transport.

900 As this snapshot of six PXDs illustrates, the proteomics-MS workflows showed a wide  
901 range of techniques (e.g. from SDS-PAGE with in-gel digests, to in-solution digest, TMT labeling  
902 and SXC chromatography) in all cases followed by reverse-phase nanoLC-MSMS but with  
903 different generations of MS instruments. Considering the total number of matched MSMS  
904 spectra, those PXDs that used affinity enrichment based on specific PTMs or isolation of highly  
905 specialized subcellular structures, clearly identified the most new canonical proteins when  
906 normalized to the number of matched spectra. This suggests that the identification of the  
907 remaining 21% of the predicted Arabidopsis proteome will be most effective when this will also  
908 include targeting specific subcellular structures and specific PTMs.

909

910 **CONCLUSIONS AND PERSPECTIVE** This second release of the Arabidopsis PeptideAtlas is  
911 based on ~259 million searched raw MSMS spectra from 115 PXDs and includes 21017 protein  
912 identifications based on ~70 million matched spectra (PSMs) and nearly 0.6 million distinct  
913 matched peptides. Compared to the first release (van Wijk et al., 2021) this represents an  
914 increase of 78% more PSMs, 11% more distinct peptides, 1.2% more proteins and an increase  
915 from 49.5% to 51.6% in global proteome sequence coverage. Furthermore, this new  
916 PeptideAtlas release includes 5198 phosphorylated proteins, 668 ubiquitinated proteins, 3050  
917 N-terminally acetylated proteins and 864 lysine-acetylated proteins. The majority of predicted  
918 Arabidopsis proteins has now been identified by MS, and users can explore the PeptideAtlas to  
919 readily determine if their proteins of interest have been identified, in which type of tissues or  
920 samples, obtain a sense of abundance, and evaluate if these proteins undergo any of the known  
921 major PTMs (phosphorylation, N-terminal or lysine acetylation, ubiquitination). Through GO  
922 enrichment analysis, machine learning, meta-data curation and analysis, as well as manual  
923 evaluation, we identified multiple reasons why proteins have not yet been identified in this new  
924 PeptideAtlas build. These reasons include i) small size (either because the gene encodes for a  
925 small protein or due to extensive proteolytic processing as in the case of signaling peptides), ii)  
926 high hydrophobicity, iii) very high pI, iv) low abundance (low expression or short-half-life), v)  
927 unusual PTMs, or vi) only presence in very specific conditions or cell types that were not  
928 included in the selected PXDs. The challenge now is to identify these remaining 20% of the

929 predicted Arabidopsis proteome. Furthermore, this new build also mapped peptides to an  
930 additional ~80 proteins not represented in the current Arabidopsis genome. These additional  
931 proteins should be considered in the community effort led by to Tanya Berardini at TAIR to  
932 generate a new annotation for Col-0 ([tinyurl.com/Athalianav12](https://tinyurl.com/Athalianav12)).

933 This PeptideAtlas was built using about ~20% of the currently (July 2022) available  
934 PXDs for Arabidopsis; incorporation of the vast majority of the unused PXDs is likely to only  
935 marginally increase the number of identified proteins as inferred from our comparison between  
936 build 1 and build 2. It is also not feasible to incorporate all these available raw data given the  
937 necessary time and expertise required. Furthermore, in case of several older PXDs in  
938 ProteomeXchange, low resolution instruments (e.g. LCQs or LTQs) or MALDI-TOF-TOF  
939 instruments were used; data from such PXDs are unlikely to contribute much to the  
940 PeptideAtlas (We note that even older data sets from 2005 – 2012 originally submitted to  
941 PRIDE are not available in ProteomeXchange).

942 To increase the number of protein identifications in PeptideAtlas, a strategic approach  
943 will be needed, by very carefully selecting data sets with the most sophisticated workflows  
944 (including selective enrichment for PTMs) and acquisition using the very latest generation of MS  
945 instruments (high mass accuracy, sensitivity and high dynamic range, very fast acquisition  
946 rates). Finally, a targeted approach to identify the missing (dark) proteome might be most  
947 effective using the combined insights from the machine learning models and the predicted  
948 protein properties and large-scale RNA-seq analysis across cell and tissue types, as well as  
949 developmental stages, biotic, and abiotic conditions.

950

951 **AUTHOR CONTRIBUTIONS** TL and ZS carried out the MS searches and PeptideAtlas data  
952 loading, supervised by EWD, and assembled the search results. ML developed the machine  
953 learning code. AK and AN assembled and analyzed the RNA-seq data. ML and SM contributed  
954 to data analysis and created figures. LM and ZS developed the PeptideAtlas web interface. IG,  
955 ED, GS, PR helped annotated the metadata in PeptideAtlas. QS helped assemble the protein  
956 search space. EWD and KJVW developed, coordinated and oversaw the project, evaluated  
957 outcomes, and wrote the paper.

958

959 **FUNDING** This work was primarily funded by the National Science Foundation IOS-1922871  
960 (KJVW & ED) and in part by DBI-1933311 (EWD), MCB-2120131 (ADLN), IOS-2023310  
961 (ADLN), and by the National Institutes of Health grant R01 GM087221 (EWD).

962

963 **ACKNOWLEDGEMENTS** We thank members of the Scientific Advisory board of the NSF grant  
964 IOS-1922871 Tanya Berardini, Chris Town, Nicholas Provart, Sixue Chen and Joshua  
965 Heazlewood for advice and feedback.

966

## 967 **TABLES**

968 **Table 1** Summarizing information for each PXD in build 2. More details and breakdown into  
969 individual experiments are provided in Supplemental Data Set 1 and the metadata annotation  
970 system in PeptideAtlas.

971 **Table 2** Summary of source databases for the Arabidopsis search space.

972 **Table 3** Comparison of summary statistics of Arabidopsis PeptideAtlas Builds 1 and 2.

973 **Table 4** Proteins identified in Araport11\* for each of the four confidence categories in build 2 for  
974 mitochondrial- (M) and plastid (C) chromosomes and the nuclear chromosomes (1-5).

975 **Table 5** Peptides assigned to proteins by hierarchy of sources ranging from Araport11 to  
976 DECOY, with each peptide is assigned only to the highest source possible and then not to any  
977 other source.

978 **Table 6** PeptideAtlas detection of the ERFVII transcription factor members involved in oxygen  
979 sensing.

980

**Table 1** Summarizing information for each PXD in build 2. More details and breakdown into individual experiments are provided in Supplemental Data Set 1 and the MetaData annotation system in PeptideAtlas.

| Dataset Identifier (hyperlinked) | Publication (hyperlinked)                                  | also in build 1 | matched # of MS/MS spectra | matched MS/MS spectra (%) | # Distinct peptides | Instrument         | Plant Parts (ecotype; default is Col-0) | Subcellular fraction, complex or interactome | N-termini; enriched PTMs (S/T/Y-phos, K-ac, K-ubi) | (a)biotic condition; development; hormone; other |
|----------------------------------|------------------------------------------------------------|-----------------|----------------------------|---------------------------|---------------------|--------------------|-----------------------------------------|----------------------------------------------|----------------------------------------------------|--------------------------------------------------|
| <a href="#">PXD000136</a>        | <a href="#">Hesse et al. (2016)</a>                        | yes             | 18082                      | 12.96 %                   | 3316                | LTQ FT             | rosette leaves                          | chloroplast; envelop, thylakoid, stroma      |                                                    |                                                  |
| <a href="#">PXD000521</a>        | <a href="#">Svozil et al. (2014)</a>                       | no              | 163204                     | 31.06 %                   | 14382               | LTQ Orbitrap XL    | roots                                   |                                              | ubiquitination                                     |                                                  |
| <a href="#">PXD000546</a>        | <a href="#">Tomizioli et al. (2014)</a>                    | yes             | 126969                     | 20.61 %                   | 6840                | LTQ Orbitrap Velos | rosette leaves                          | chloroplast; thylakoid domains               |                                                    |                                                  |
| <a href="#">PXD000565</a>        | <a href="#">Svozil et al. (2014)</a>                       | no              | 174929                     | 37.98 %                   | 23291               | LTQ Orbitrap XL    | rosette leaves                          |                                              | ubiquitination                                     |                                                  |
| <a href="#">PXD000566</a>        | <a href="#">Svozil et al. (2014)</a>                       | no              | 53695                      | 21.19 %                   | 3992                | LTQ Orbitrap XL    | roots                                   |                                              | ubiquitination                                     |                                                  |
| <a href="#">PXD000567</a>        | <a href="#">Svozil et al. (2014)</a>                       | no              | 907437                     | 47.57 %                   | 27003               | LTQ Orbitrap XL    | roots                                   |                                              | ubiquitination                                     |                                                  |
| <a href="#">PXD000568</a>        | <a href="#">Svozil et al. (2014)</a>                       | no              | 441504                     | 41.84 %                   | 22249               | LTQ Orbitrap XL    | roots                                   |                                              | ubiquitination                                     |                                                  |
| <a href="#">PXD000660</a>        | <a href="#">Köhler et al. (2015)</a>                       | yes             | 8460                       | 9.00 %                    | 2442                | LTQ Orbitrap Velos | rosette leaves                          | chloroplast                                  | N-terminome (TAILS)                                | import mutants                                   |
| <a href="#">PXD000869</a>        | <a href="#">Zhang et al. (2018)</a>                        | yes             | 51685                      | 32.81 %                   | 3281                | LTQ Orbitrap Velos | rosette leaves                          | chloroplast                                  |                                                    | clpc1 mutant                                     |
| <a href="#">PXD000908</a>        | <a href="#">Baerenfaller et al (2015)</a>                  | yes             | 359466                     | 16.63 %                   | 12343               | LTQ Orbitrap XL    | rosette leaves                          |                                              |                                                    | photoperiod                                      |
| <a href="#">PXD000941</a>        | <a href="#">Svozil, Gruissem &amp; Baerenfaller (2015)</a> | no              | 206471                     | 27.21 %                   | 9626                | LTQ Orbitrap XL    | rosette leaves                          | epidermis, mesophyll, vasculature            | ubiquitination                                     |                                                  |
| <a href="#">PXD000942</a>        | <a href="#">Svozil, Gruissem &amp; Baerenfaller (2015)</a> | no              | 66306                      | 6.51 %                    | 5573                | LTQ Orbitrap XL    | rosette leaves                          | epidermis                                    | ubiquitination                                     |                                                  |
| <a href="#">PXD001207</a>        | <a href="#">Köhler et al. (2015)</a>                       | yes             | 21063                      | 27.58 %                   | 5648                | LTQ Orbitrap Velos | rosette leaves                          | chloroplast; membranes, tic56                |                                                    |                                                  |
| <a href="#">PXD001473</a>        | <a href="#">Lin et al. (2015)</a>                          | yes             | 10693                      | 8.98 %                    | 480                 | LTQ Orbitrap       | cell culture (ler)                      |                                              | phosphorylation                                    | Brassinosteroid                                  |
| <a href="#">PXD001719</a>        | <a href="#">Zhang et al. (2015)</a>                        | yes             | 36025                      | 15.93 %                   | 10166               | LTQ Orbitrap Velos | roots                                   |                                              | N-terminome (TAILS)                                | N-end rule                                       |
| <a href="#">PXD001855</a>        | <a href="#">Venne et al. (2015)</a>                        | yes             | 29980                      | 9.24 %                    | 11099               | Q Exactive         | seedlings                               |                                              | N-terminome (ChaFRADI)                             |                                                  |

C)

|                                               |                                                                                                                                                   |     |        |         |       |                          |                       |                                           |                                        |                     |
|-----------------------------------------------|---------------------------------------------------------------------------------------------------------------------------------------------------|-----|--------|---------|-------|--------------------------|-----------------------|-------------------------------------------|----------------------------------------|---------------------|
| <a href="#">PXD0020</a><br><a href="#">69</a> | <a href="#">Linster et al. (2015)</a>                                                                                                             | yes | 229132 | 6.92 %  | 6433  | LTQ<br>Orbitrap<br>Velos | rosette<br>leaves     |                                           | acetylation<br>of N-term<br>and lysine | drought,<br>ABA     |
| <a href="#">PXD0021</a><br><a href="#">60</a> | <a href="http://dx.doi.org/10.1038/nplants.2015.225">http://dx.doi.org/10.1038/nplants.2015.225</a> ; <a href="#">Correa-Galvis et al. (2016)</a> | yes | 67006  | 11.73 % | 2691  | LTQ<br>Orbitrap<br>Elite | rosette<br>leaves     | chloroplast;<br>PsbS<br>interactome       |                                        |                     |
| <a href="#">PXD0021</a><br><a href="#">86</a> | <a href="#">Nishimura et al. (2015)</a>                                                                                                           | yes | 244861 | 43.11 % | 8681  | LTQ<br>Orbitrap          | rosette<br>leaves     | chloroplast,<br>Clp<br>protease           |                                        |                     |
| <a href="#">PXD0022</a><br><a href="#">97</a> | <a href="#">Walton et al. (2016)</a>                                                                                                              | no  | 18194  | 10.62 % | 6116  | Q<br>Exactive            | seedlings             |                                           | ubiquitination                         |                     |
| <a href="#">PXD0031</a><br><a href="#">62</a> | <a href="#">Lundquist et al. (2017)</a>                                                                                                           | yes | 247256 | 30.21 % | 11321 | LTQ<br>Orbitrap<br>Elite | rosette<br>leaves     | chloroplast;<br>membrane<br>complexes     |                                        | BN-PAGE             |
| <a href="#">PXD0035</a><br><a href="#">16</a> | <a href="#">Wang et al. (2016)</a>                                                                                                                | yes | 38195  | 25.95 % | 14849 | Q<br>Exactive            | rosette<br>leaves     | chloroplast                               |                                        | darkness            |
| <a href="#">PXD0036</a><br><a href="#">84</a> | <a href="#">Bhuiyan et al. (2016)</a>                                                                                                             | yes | 114273 | 28.47 % | 7004  | LTQ<br>Orbitrap          | rosette<br>leaves     | chloroplast;<br>plastoglobul<br>es; pgm48 |                                        | senescence          |
| <a href="#">PXD0040</a><br><a href="#">25</a> | <a href="#">Al Shweiki et al. (2017)</a>                                                                                                          | yes | 463956 | 32.45 % | 19225 | LTQ<br>Orbitrap<br>Velos | rosette<br>leaves     |                                           |                                        | variability         |
| <a href="#">PXD0042</a><br><a href="#">76</a> | <a href="#">Choudhary et al. (2016)</a>                                                                                                           | yes | 62409  | 18.68 % | 12727 | LTQ<br>Orbitrap          | seedlings             |                                           | phosphoryl<br>ation                    | cirdadian<br>rhythm |
| <a href="#">PXD0045</a><br><a href="#">99</a> | <a href="#">Mattei et al. (2016)</a>                                                                                                              | yes | 11521  | 15.10 % | 2145  | LTQ<br>Orbitrap          | seedlings             |                                           | phosphoryl<br>ation                    |                     |
| <a href="#">PXD0047</a><br><a href="#">42</a> | <a href="#">Subramanian, Souleimanov &amp; Smith (2016)</a>                                                                                       | yes | 110661 | 30.87 % | 5596  | LTQ<br>Orbitrap<br>Velos | rosette<br>leaves     |                                           |                                        | salt stress         |
| <a href="#">PXD0048</a><br><a href="#">96</a> | <a href="#">Willems et al. (2017)</a>                                                                                                             | yes | 66438  | 9.58 %  | 24905 | LTQ<br>Orbitrap          | cell culture<br>(ler) |                                           | N-<br>terminome<br>(COFRADI<br>C)      |                     |
| <a href="#">PXD0056</a><br><a href="#">00</a> | <a href="#">Schönberg et al. (2017)</a>                                                                                                           | yes | 50371  | 14.13 % | 2242  | LTQ<br>Orbitrap<br>Velos | rosette<br>leaves     | chloroplast                               | phosphoryl<br>ation                    |                     |
| <a href="#">PXD0057</a><br><a href="#">40</a> | <a href="#">Hander et al. (2019)</a>                                                                                                              | yes | 1197   | 1.79 %  | 771   | Q<br>Exactive            | roots;<br>rosettes    |                                           |                                        | metacaspas<br>e     |
| <a href="#">PXD0061</a><br><a href="#">13</a> | <a href="#">Brocard et al. (2017)</a>                                                                                                             | yes | 126442 | 33.74 % | 10947 | LTQ<br>Orbitrap          | rosette<br>leaves     | lipid droplet                             |                                        |                     |
| <a href="#">PXD0063</a><br><a href="#">28</a> | <a href="#">Strehmel et al. (2017)</a>                                                                                                            | yes | 27755  | 8.78 %  | 5167  | Q<br>Exactive            | roots                 | exudate                                   |                                        |                     |
| <a href="#">PXD0063</a><br><a href="#">47</a> | <a href="#">Née et al. (2017)</a>                                                                                                                 | yes | 3527   | 1.14 %  | 746   | Q<br>Exactive            | seed                  | DOG1<br>interactome                       |                                        |                     |
| <a href="#">PXD0066</a><br><a href="#">51</a> | <a href="#">Hartl et al. (2017)</a>                                                                                                               | yes | 156348 | 59.20 % | 26635 | Q<br>Exactive            | rosette<br>leaves     | chloroplast                               | lysine<br>acetylation                  |                     |



|                                               |                                                  |     |        |         |       |                                      |                                      |                                                                                          |                               |                      |
|-----------------------------------------------|--------------------------------------------------|-----|--------|---------|-------|--------------------------------------|--------------------------------------|------------------------------------------------------------------------------------------|-------------------------------|----------------------|
| <a href="#">PXD0066</a><br><a href="#">52</a> | <a href="#">Hartl et al. (2017)</a>              | yes | 116946 | 25.60 % | 15003 | Q<br>Exactive                        | rosette leaves                       | chloroplast; thylakoid                                                                   | lysine acetylation            |                      |
| <a href="#">PXD0066</a><br><a href="#">94</a> | <a href="#">McBride et al 2017 MCP</a>           | no  | 896288 | 64.10 % | 16941 | Q<br>Exactive ;<br>TripleTO F 5600   | rosette leaves                       | microsome membrane complexes                                                             |                               |                      |
| <a href="#">PXD0068</a><br><a href="#">00</a> | <a href="#">Brault et al. (2019)</a>             | yes | 269151 | 52.68 % | 29671 | Q<br>Exactive                        | cell culture (ler)                   | total cell extract, plasmodesmata, plasma membrane, microsome & cell wall plasmodesmata, |                               |                      |
| <a href="#">PXD0068</a><br><a href="#">06</a> | <a href="#">Brault et al. (2019)</a>             | yes | 638600 | 73.78 % | 39245 | Q<br>Exactive                        | cell culture (ler)                   | plasma membrane, microsome & cell wall                                                   |                               |                      |
| <a href="#">PXD0068</a><br><a href="#">48</a> | <a href="#">Seaton et al. (2018)</a>             | yes | 864599 | 28.98 % | 28901 | LTQ<br>Orbitrap Velos                | rosette leaves                       |                                                                                          |                               | light period         |
| <a href="#">PXD0070</a><br><a href="#">54</a> | <a href="#">Rytz et al. (2018)</a>               | no  | 113434 | 37.67 % | 10499 | LTQ<br>Orbitrap Velos; Q<br>Exactive | seedlings                            |                                                                                          | sumoylation                   | heat stress          |
| <a href="#">PXD0076</a><br><a href="#">00</a> | <a href="#">Uhrig et al. (2020)</a>              | no  | 616208 | 6.92 %  | 25480 | Orbitrap Fusion; Q<br>Exactive       | rosette leaves                       |                                                                                          | phosphorylation               | diurnal              |
| <a href="#">PXD0076</a><br><a href="#">30</a> | <a href="#">Koskela et al. (2018)</a>            | yes | 207912 | 43.98 % | 17031 | Q<br>Exactive                        | rosette leaves                       | chloroplast; KAT                                                                         | N-terminal/lysine acetylation |                      |
| <a href="#">PXD0083</a><br><a href="#">55</a> | <a href="#">Van Leene et al. (2019)</a>          | yes | 365300 | 27.09 % | 20308 | Q<br>Exactive                        | cell culture (ler)                   |                                                                                          | phosphorylation               |                      |
| <a href="#">PXD0086</a><br><a href="#">63</a> | <a href="#">Castrec et al. (2018)</a>            | yes | 156183 | 4.58 %  | 4772  | LTQ<br>Orbitrap Velos                | rosette leaves                       |                                                                                          | N-term & lysine acetylation   |                      |
| <a href="#">PXD0090</a><br><a href="#">16</a> | <a href="#">Zhang et al. (2019)</a>              | yes | 71216  | 11.00 % | 10511 | Q<br>Exactive                        | rosette leaves                       |                                                                                          | phosphorylation               |                      |
| <a href="#">PXD0092</a><br><a href="#">74</a> | <a href="#">Rytz et al. (2018)</a>               | no  | 101621 | 29.47 % | 8762  | Q<br>Exactive                        | seedlings                            |                                                                                          | sumoylation                   |                      |
| <a href="#">PXD0103</a><br><a href="#">24</a> | <a href="#">Waltz et al (2019) Nature Plants</a> | yes | 434505 | 47.48 % | 16691 | Q<br>Exactive                        | flowers; cell culture                | mitochondria; ribosome                                                                   |                               |                      |
| <a href="#">PXD0105</a><br><a href="#">45</a> | <a href="#">Bouchnak et al. (2019)</a>           | yes | 80068  | 23.05 % | 16460 | Q<br>Exactive                        | rosette leaves (ws)                  | chloroplast; envelope                                                                    |                               |                      |
| <a href="#">PXD0107</a><br><a href="#">30</a> | <a href="#">Wu et al. (2019)</a>                 | yes | 554183 | 39.04 % | 25341 | Q<br>Exactive                        | rosette leaves                       |                                                                                          |                               | gun1 & clpc1 mutants |
| <a href="#">PXD0110</a><br><a href="#">88</a> | <a href="#">Rugen et al. (2019)</a>              | yes | 799790 | 31.44 % | 24387 | Q<br>Exactive                        | rosette leaves; cell culture (col-0) | mitochondria; ribosome                                                                   |                               |                      |

|                                               |                                          |     |             |            |            |                                                    |                                                                                                                                                                                                                                                                                                                                                |                                                 |                               |
|-----------------------------------------------|------------------------------------------|-----|-------------|------------|------------|----------------------------------------------------|------------------------------------------------------------------------------------------------------------------------------------------------------------------------------------------------------------------------------------------------------------------------------------------------------------------------------------------------|-------------------------------------------------|-------------------------------|
| <a href="#">PXD0114</a><br><a href="#">83</a> | <a href="#">McLoughlin et al. (2019)</a> | yes | 377815<br>6 | 49.67<br>% | 48727      | Q<br>Exactive                                      | rosette<br>leaves;<br>seedling                                                                                                                                                                                                                                                                                                                 | protein<br>aggregates;<br>HSP101<br>interactome |                               |
| <a href="#">PXD0117</a><br><a href="#">16</a> | <a href="#">Kosmacz et al. (2019)</a>    | yes | 105146      | 15.08<br>% | 21595      | Q<br>Exactive                                      | seedlings                                                                                                                                                                                                                                                                                                                                      | stress<br>granule                               |                               |
| <a href="#">PXD0117</a><br><a href="#">59</a> | <a href="#">Wu et al. (2019)</a>         | yes | 764134      | 40.48<br>% | 36970      | Q<br>Exactive                                      | seedlings                                                                                                                                                                                                                                                                                                                                      |                                                 | gun1<br>mutant;<br>lincomycin |
| <a href="#">PXD0127</a><br><a href="#">08</a> | <a href="#">Zhang et al. (2019)</a>      | yes | 697197<br>7 | 60.23<br>% | 23422<br>0 | Orbitrap<br>Fusion<br>Lumos                        | 10 plant<br>parts<br>(rosette<br>leaves,<br>cauline<br>leaf,<br>stems,<br>flower,<br>pollen,<br>siliques,<br>seeds,<br>cotyledons<br>, root, root<br>cell<br>culture)<br>11 plant<br>parts<br>(rosette<br>leaves,<br>cauline<br>leaf,<br>stems,<br>flower,<br>pollen,<br>siliques,<br>seeds,<br>cotyledons<br>, root, root<br>cell<br>culture) |                                                 | large scale<br>tissue atlas   |
| <a href="#">PXD0127</a><br><a href="#">10</a> | <a href="#">Zhang et al. (2019)</a>      | yes | 162960<br>6 | 11.94<br>% | 89974      | TripleTO<br>F 5600<br>(Sciex)                      | stems,<br>flower,<br>pollen,<br>siliques,<br>seeds,<br>cotyledons<br>, root, root<br>cell<br>culture)                                                                                                                                                                                                                                          |                                                 | large scale<br>tissue atlas   |
| <a href="#">PXD0130</a><br><a href="#">05</a> | <a href="#">Wu et al. (2019)</a>         | yes | 103841<br>7 | 49.73<br>% | 43943      | Q<br>Exactive                                      | seedlings                                                                                                                                                                                                                                                                                                                                      |                                                 | gun1<br>mutant;<br>lincomycin |
| <a href="#">PXD0132</a><br><a href="#">64</a> | <a href="#">McWhiteetal (2020) Cell</a>  | no  | 344797      | 16.90<br>% | 23471      | Orbitrap<br>Fusion                                 | seeds                                                                                                                                                                                                                                                                                                                                          | complexes                                       | ttg1-1<br>mutant              |
| <a href="#">PXD0133</a><br><a href="#">21</a> | <a href="#">McWhiteetal (2020) Cell</a>  | no  | 664021      | 22.82<br>% | 41207      | Orbitrap<br>Fusion<br>Lumos;<br>Orbitrap<br>Fusion | seedlings                                                                                                                                                                                                                                                                                                                                      | complexes                                       |                               |
| <a href="#">PXD0133</a><br><a href="#">25</a> | <a href="#">Jiang et al. (2019)</a>      | yes | 8753        | 13.08<br>% | 2587       | LTQ<br>Orbitrap<br>Elite                           | rosette<br>leaves                                                                                                                                                                                                                                                                                                                              | BSF<br>interactome                              |                               |
| <a href="#">PXD0133</a><br><a href="#">82</a> | <a href="#">Smith et al. (2020)</a>      | no  | 676706      | 46.29<br>% | 30653      | Q<br>Exactive                                      | rosette<br>leaves                                                                                                                                                                                                                                                                                                                              | phosphoryl<br>ation                             | aux; IAA                      |
| <a href="#">PXD0134</a><br><a href="#">94</a> | <a href="#">Montandon et al. (2019)</a>  | yes | 27644       | 18.44<br>% | 2991       | LTQ<br>Orbitrap                                    | rosette<br>leaves                                                                                                                                                                                                                                                                                                                              | chloroplast;<br>ClpC<br>interactome             | CEP5                          |
| <a href="#">PXD0134</a><br><a href="#">95</a> | <a href="#">Huang et al. (2019)</a>      | no  | 4115        | 3.15<br>%  | 907        | Orbitrap<br>Fusion                                 | cell culture<br>(ler)                                                                                                                                                                                                                                                                                                                          | sulfenylatio<br>n                               | H2O2                          |

|                                               |                                              |     |          |         |        |                                  |                        |                                                   |                          |
|-----------------------------------------------|----------------------------------------------|-----|----------|---------|--------|----------------------------------|------------------------|---------------------------------------------------|--------------------------|
| <a href="#">PXD0136</a><br><a href="#">37</a> | <a href="#">Hu et al. (2019)</a>             | yes | 73524    | 12.86 % | 13550  | Q Exactive                       | rosette leaves         | CDKD, Cyclin H, H3 interactome s                  | GFP-TRAP; RFP-TRAP       |
| <a href="#">PXD0136</a><br><a href="#">46</a> | <a href="#">Fortauer et al. (2019)</a>       | yes | 2990818  | 26.55 % | 35710  | Q Exactive ; LTQ Orbitrap Elite  | rosette leaves (ler)   | non aqueous fractionation                         | cold, high light. gin2-1 |
| <a href="#">PXD0138</a><br><a href="#">68</a> | <a href="#">Mergner et al. (2020)</a>        | yes | 19758985 | 39.03 % | 391044 | Q Exactive HF                    | 30 tissue types        | phosphorylation                                   | large scale tissue atlas |
| <a href="#">PXD0140</a><br><a href="#">08</a> | <a href="#">Van Moerkercke et al. (2019)</a> | no  | 1226474  | 26.19 % | 29177  | Orbitrap Fusion                  | seedlings              |                                                   |                          |
| <a href="#">PXD0142</a><br><a href="#">92</a> | <a href="#">Fuchs et al. (2019)</a>          | no  | 122197   | 68.55 % | 26734  | Q Exactive                       | cell culture           | mitochondria                                      | protein copy numbers     |
| <a href="#">PXD0143</a><br><a href="#">02</a> | <a href="#">Nietzel et al 2020 PNAS</a>      | no  | 32252    | 34.01 % | 2977   | LTQ Orbitrap Velos               | seedlings              | mitochondria; cysteine oxidation                  |                          |
| <a href="#">PXD0146</a><br><a href="#">10</a> | <a href="#">Gemperline et al. (2019)</a>     | no  | 366368   | 20.14 % | 9979   | LTQ Orbitrap Velos; Q Exactive   | seedlings              | proteasome subcomplexes                           |                          |
| <a href="#">PXD0146</a><br><a href="#">17</a> | <a href="#">McWhite et al. (2020) Cell</a>   | no  | 301546   | 8.33 %  | 15349  | LTQ Orbitrap Velos; LTQ Orbitrap | rosette leaves         | complexes                                         |                          |
| <a href="#">PXD0151</a><br><a href="#">35</a> | <a href="#">Kretzschmar et al. (2019)</a>    | no  | 657992   | 56.50 % | 27068  | Q Exactive                       | seed; seedlings        | lipid droplet                                     | seed germination         |
| <a href="#">PXD0151</a><br><a href="#">61</a> | <a href="#">Mair et al. (2019)</a>           | no  | 235942   | 36.45 % | 19450  | Q Exactive                       | seedlings              | epidermis, guard cells; proximity labeling        |                          |
| <a href="#">PXD0151</a><br><a href="#">62</a> | <a href="#">Mair et al. (2019)</a>           | no  | 94840    | 35.78 % | 27874  | Q Exactive                       | seedlings              | guard cells; nuclei; proximity labeling           |                          |
| <a href="#">PXD0152</a><br><a href="#">12</a> | <a href="#">Mair et al. (2019)</a>           | no  | 71984    | 25.43 % | 11159  | Q Exactive                       | seedlings              | guard cells; proximity labeling; FAMA interactome |                          |
| <a href="#">PXD0156</a><br><a href="#">24</a> | <a href="#">Berger et al. (2020)</a>         | no  | 2003312  | 48.69 % | 89519  | Q Exactive                       | rosette leaves & roots | chloroplast; Fe-S clusters                        |                          |
| <a href="#">PXD0156</a><br><a href="#">36</a> | <a href="#">Berger et al. (2020)</a>         | no  | 9616     | 15.03 % | 650    | Q Exactive                       | rosette leaves & roots | chloroplast; Fe-S clusters interactome            |                          |
| <a href="#">PXD0159</a><br><a href="#">19</a> | <a href="#">Huang et al 2020 Nat Comm</a>    | no  | 1676583  | 47.70 % | 60917  | Q Exactive                       | seedlings              | nuclear membrane; proximity labeling              |                          |
| <a href="#">PXD0162</a><br><a href="#">63</a> | <a href="#">Petereit et al. (2020)</a>       | no  | 6316     | 4.92 %  | 1917   | Orbitrap Fusion Lumos            | seedlings              | mitochondria                                      | N-terminome (ChaFradic)  |
| <a href="#">PXD0163</a><br><a href="#">15</a> | <a href="#">Fola et al. (2020)</a>           | no  | 292510   | 52.00 % | 51094  | Q Exactive                       | flowers                |                                                   | nac mutants              |

|                                               |                                                    |     |         |         |        |                                               |                      |                                                    |                                          |
|-----------------------------------------------|----------------------------------------------------|-----|---------|---------|--------|-----------------------------------------------|----------------------|----------------------------------------------------|------------------------------------------|
| <a href="#">PXD0164</a><br><a href="#">57</a> | <a href="#">Sang et al. (2020)</a>                 | no  | 121254  | 25.65 % | 23169  | Q<br>Exactive                                 | leaf petiole         | TF<br>interactome                                  |                                          |
| <a href="#">PXD0165</a><br><a href="#">07</a> | <a href="#">Li et al 2020 Front Plant Sci</a>      | no  | 14297   | 13.97 % | 1276   | LTQ<br>Orbitrap                               | seedlings            | phosphorylation                                    | carbon/nitrogen-nutrient stress,         |
| <a href="#">PXD0165</a><br><a href="#">75</a> | <a href="#">Rodriguez et al 2020 EmboJournal</a>   | no  | 566166  | 29.36 % | 104516 | Q<br>Exactive                                 | seedlings            |                                                    | large scale. Autophagy; reprogramming    |
| <a href="#">PXD0167</a><br><a href="#">46</a> | <a href="#">Petereit et al. (2020)</a>             | no  | 91088   | 21.35 % | 5406   | Orbitrap<br>Fusion                            | seedlings            | mitochondria                                       | ClpXP                                    |
| <a href="#">PXD0168</a><br><a href="#">83</a> | <a href="#">Maronedze et al. (2019)</a>            | no  | 1895    | 10.93 % | 1329   | Q<br>Exactive                                 | roots                | mRNA binding proteins<br>interactome               |                                          |
| <a href="#">PXD0171</a><br><a href="#">89</a> | <a href="#">Bhyuian et al (2020) Plant Physiol</a> | yes | 73870   | 40.64 % | 5053   | LTQ<br>Orbitrap                               | rosette leaves       | chloroplast                                        | cgep mutant                              |
| <a href="#">PXD0173</a><br><a href="#">80</a> | Dataset with its publication pending               | yes | 425590  | 19.66 % | 28385  | Q<br>Exactive                                 | rosette leaves       | chloroplast; plastoglobules                        | abck                                     |
| <a href="#">PXD0174</a><br><a href="#">00</a> | <a href="#">Liao et al. (2022)</a>                 | yes | 483662  | 23.00 % | 19617  | Q<br>Exactive                                 | rosette leaves       | chloroplast; ClpC<br>interactome                   |                                          |
| <a href="#">PXD0174</a><br><a href="#">30</a> | <a href="#">Armbruster et al. (2020)</a>           | no  | 13249   | 2.19 %  | 1040   | LTQ<br>Orbitrap<br>Velos                      | rosette leaves       |                                                    | N-terminome (SILProNA Q)<br>NAA50 mutant |
| <a href="#">PXD0174</a><br><a href="#">43</a> | <a href="#">Smith et al. (2020)</a>                | no  | 6753    | 16.30 % | 3002   | Q<br>Exactive<br>HF                           | seedlings            | phosphorylation                                    |                                          |
| <a href="#">PXD0174</a><br><a href="#">44</a> | <a href="#">Smith et al. (2020)</a>                | no  | 2504    | 11.60 % | 1123   | Q<br>Exactive<br>HF                           | rosette leaves       | phosphorylation                                    |                                          |
| <a href="#">PXD0176</a><br><a href="#">63</a> | <a href="#">Armbruster et al. (2020)</a>           | no  | 284977  | 41.63 % | 38070  | Q<br>Exactive                                 | rosette leaves       |                                                    |                                          |
| <a href="#">PXD0181</a><br><a href="#">41</a> | <a href="#">Bach-Pages et al. (2020)</a>           | no  | 27938   | 11.82 % | 4731   | LTQ<br>Orbitrap<br>Elite                      | rosette leaves       | RNA binding proteins                               |                                          |
| <a href="#">PXD0189</a><br><a href="#">11</a> | <a href="#">Velanis et al. (2020)</a>              | no  | 224619  | 23.28 % | 19188  | Orbitrap<br>Fusion<br>Lumos;<br>Q<br>Exactive | inluorescence        | APL2 polycomb complex                              |                                          |
| <a href="#">PXD0189</a><br><a href="#">87</a> | <a href="#">Meteignier et al (2021)</a>            | no  | 89778   | 41.45 % | 3615   | Q<br>Exactive                                 | rosette leaves       | chloroplast; mTERF<br>interactome<br>mitochondria; |                                          |
| <a href="#">PXD0192</a><br><a href="#">53</a> | <a href="#">Rugen et al. (2021)</a>                | no  | 2009301 | 36.94 % | 24379  | Q<br>Exactive                                 | rosette leaves       | complexes<br>BN-PAGE                               | light; dark                              |
| <a href="#">PXD0193</a><br><a href="#">29</a> | <a href="#">Firmino et al. (2020)</a>              | no  | 143289  | 18.47 % | 9924   | Q<br>Exactive                                 | leaves, roots, seeds | 70S & 80S ribosomes                                |                                          |
| <a href="#">PXD0193</a><br><a href="#">30</a> | <a href="#">Bassal et al. (2020)</a>               | no  | 3285309 | 28.00 % | 108927 | LTQ<br>Orbitrap<br>Velos                      | multiple tissues     |                                                    | senescence                               |

|                           |                                          |    |         |        |       |                                          |                          |                                      |                                      |
|---------------------------|------------------------------------------|----|---------|--------|-------|------------------------------------------|--------------------------|--------------------------------------|--------------------------------------|
| <a href="#">PXD019603</a> | <a href="#">Escobar et al. (2021)</a>    | no | 1082918 | 66.62% | 24113 | orbitrap                                 | rosette leaves           | mitochondria                         | mHSP mutants                         |
| <a href="#">PXD019737</a> | <a href="#">Junková et al. (2021)</a>    | no | 1228828 | 57.80% | 35580 | Orbitrap Fusion Lumos                    | rosette leaves           | microsomes                           |                                      |
| <a href="#">PXD019904</a> | <a href="#">Scarpin et al. (2020)</a>    | no | 42620   | 12.74% | 10280 | Q Exactive                               | seedlings                |                                      | phosphorylation                      |
| <a href="#">PXD019928</a> | <a href="#">Iannetta et al. (2021)</a>   | no | 10234   | 4.90%  | 800   | Q Exactive HF-X                          | rosette leaves           |                                      | peptidome; peptidase mutant          |
| <a href="#">PXD019942</a> | <a href="#">Scarpin et al. (2020)</a>    | no | 91      | 9.13%  | 19    | Q Exactive                               | seedlings                |                                      | phosphorylation<br>early development |
| <a href="#">PXD020480</a> | <a href="#">Prerostova et al. (2021)</a> | no | 852658  | 57.34% | 11650 | Orbitrap Fusion Lumos                    | rosette leaves           |                                      | cold treatments                      |
| <a href="#">PXD020588</a> | <a href="#">Zhang et al. (2020)</a>      | no | 83041   | 18.42% | 4586  | LTQ                                      | rosette leaves           | mitochondria; glycolytic interactome |                                      |
| <a href="#">PXD020700</a> | <a href="#">Bietal(2021)</a>             | no | 9334    | 8.39%  | 3478  | LTQ Orbitrap Velos                       | seedlings                | spliceosome complex                  |                                      |
| <a href="#">PXD020748</a> | <a href="#">Bietal(2021)</a>             | no | 12876   | 14.50% | 3339  | Q Exactive HF                            | seedlings                | spliceosome complex                  |                                      |
| <a href="#">PXD020749</a> | <a href="#">Bietal(2021)</a>             | no | 40608   | 45.09% | 18191 | Q Exactive HF                            | seedlings                | spliceosome complex                  |                                      |
| <a href="#">PXD020762</a> | <a href="#">Wilson et al. (2021)</a>     | no | 53806   | 17.09% | 22713 | Orbitrap Fusion Lumos                    | seedlings                |                                      | phosphorylation                      |
| <a href="#">PXD021518</a> | <a href="#">Pipitone et al.(2021)</a>    | no | 1219202 | 42.93% | 49511 | Q Exactive HF-X                          | seedlings; de-etiolation |                                      |                                      |
| <a href="#">PXD021992</a> | <a href="#">Grubbe et al. 2021</a>       | no | 143824  | 8.41%  | 13424 | Orbitrap Fusion                          | seedlings                |                                      | ubiquitination                       |
| <a href="#">PXD022684</a> | <a href="#">Parker et al. (2020)</a>     | no | 15582   | 3.85%  | 2640  | LTQ Orbitrap Velos                       | seedlings                | RNA binding protein FPA interactome  |                                      |
| <a href="#">PXD023017</a> | <a href="#">Ligas et al. (2019)</a>      | no | 343086  | 28.90% | 14964 | Q Exactive                               | rosette leaves           | mitochondria, OXPHOS complex         |                                      |
| <a href="#">PXD023022</a> | <a href="#">Yperman et al. (2021)</a>    | no | 14761   | 4.26%  | 777   | Q Exactive HF                            | seedlings                | TPLATE complex                       |                                      |
| <a href="#">PXD023051</a> | <a href="#">Yperman et al. (2021)</a>    | no | 9644    | 11.74% | 2119  | Q Exactive                               | seedlings                | TPLATE complex                       |                                      |
| <a href="#">PXD026180</a> | <a href="#">Dahhan et al. (2021)</a>     | no | 505227  | 42.46% | 50401 | LTQ FT Ultra; Q Exactive ; Q Exactive HF | cell culture (ler)       | trans-golgi network                  |                                      |

**Table 2** Summary of source databases for the Arabidopsis search space.

| Source                            | Sequences | Distinct | Unique | PeptideAtlasAllOrganellar | PeptideAtlasMinimalOrganellar | AraportUpdated | Araport11 | TAIR10 | Pseudogenes | UniProtKB | RefSeq | ARA-PEP:LW | ARA-PEP:SIPs | ARA-PEP:sORFs | lowaORFs |
|-----------------------------------|-----------|----------|--------|---------------------------|-------------------------------|----------------|-----------|--------|-------------|-----------|--------|------------|--------------|---------------|----------|
| PeptideAtlasAllOrganellar (a)     | 197       | 195      | 34     |                           | 114                           | 123            | 106       | 110    | 0           | 110       | 103    | 0          | 0            | 0             | 37       |
| PeptideAtlasMinimalOrganellar (b) | 114       | 114      | 0      |                           |                               | 114            | 64        | 65     | 0           | 93        | 79     | 0          | 0            | 0             | 27       |
| AraportUpdated (c)                | 42617     | 40716    | 0      |                           |                               |                | 40666     | 31026  | 0           | 38651     | 40660  | 0          | 0            | 0             | 1112     |
| Araport11 (d)                     | 48359     | 40784    | 10     |                           |                               |                |           | 31133  | 0           | 38700     | 40654  | 0          | 0            | 0             | 1147     |
| TAIR10 (e)                        | 35386     | 32785    | 1500   |                           |                               |                |           |        | 0           | 29401     | 31032  | 0          | 0            | 0             | 1057     |
| Pseudogenes (f)                   | 3720      | 3702     | 3701   |                           |                               |                |           |        |             | 0         | 0      | 0          | 0            | 1             | 0        |
| UniProtKB (g)                     | 39342     | 39273    | 373    |                           |                               |                |           |        |             |           | 38669  | 0          | 0            | 0             | 1115     |
| RefSeq (h)                        | 48265     | 40709    | 5      |                           |                               |                |           |        |             |           |        | 0          | 0            | 0             | 1116     |
| ARA-PEP:LW (i)                    | 16809     | 16628    | 16478  |                           |                               |                |           |        |             |           |        |            | 21           | 129           | 0        |
| ARA-PEP:SIPs (j)                  | 607       | 606      | 565    |                           |                               |                |           |        |             |           |        |            |              | 20            | 0        |
| ARA-PEP:sORFs (k)                 | 7901      | 7764     | 7614   |                           |                               |                |           |        |             |           |        |            |              |               | 0        |
| lowaORFs (l)                      | 7481      | 7270     | 6116   |                           |                               |                |           |        |             |           |        |            |              |               |          |
| <b>Total non-redundant</b>        |           |          |        |                           |                               |                |           |        |             |           |        |            |              |               |          |

(a) PeptideAtlasAllOrganellar includes all the PeptideAtlas\_ATXGnnnnnn.1 (original), .2 (RNA edits [major]), .3 (RNA edits [major and minor]), .4 (RNA edits [major, minor, and truncations])

(b) PeptideAtlasMinimalOrganellar includes one protein for each organellar gene, the RNA edited [major only] version if there are edits, or the original if no editing sites

(c) AraportUpdated begins with the Araport11 proteome with all organellar proteins replaced with PeptideAtlasMinimalOrganellar set and other corrections discussed in this article applied

(d) Araport11 represents the current set of Araport11 proteins as downloaded 2021-04-26

(e) TAIR10 represents the current set of TAIR10 proteins as downloaded 2020-12-22

(f) Pseudogenes represent an additional set of entries labeled as "pseudogenes" in Araport11 and are thus not exported as part of the proteome - downloaded '21-02-23

**Table 3.** Comparison of summary statistics of Arabidopsis PeptideAtlas Builds 1 and 2.

| Metric                                                                                                                                              | Build 1     | Build 2     | Ratio of 2 / 1 |
|-----------------------------------------------------------------------------------------------------------------------------------------------------|-------------|-------------|----------------|
| Datasets (PXDs)                                                                                                                                     | 52          | 115         | 2.21           |
| Experiments                                                                                                                                         | 266         | 369         | 1.39           |
| MS Runs                                                                                                                                             | 6,148       | 10,478      | 1.70           |
| MS2 Spectra Acquired (a)                                                                                                                            | 142,703,610 | 259,383,093 | 1.82           |
| MS2 Spectra Scored (b)                                                                                                                              | 125,181,633 | 210,655,824 | 1.68           |
| PSM FDR                                                                                                                                             | 0.001       | 0.0008      | 0.80           |
| PSMs passing threshold                                                                                                                              | 39,480,811  | 70,470,125  | 1.78           |
| Distinct Peptides                                                                                                                                   | 535,340     | 596,839     | 1.11           |
| Canonical proteins (Araport11*)                                                                                                                     | 17,858      | 18,267      | 1.02           |
| Uncertain proteins (Araport11*)                                                                                                                     | 1,942       | 1,856       | 0.96           |
| Redundant proteins (Araport11*)                                                                                                                     | 1,600       | 1,540       | 0.96           |
| Not observed proteins (Araport11*)                                                                                                                  | 6,255       | 5,896       | 0.94           |
| Araport11* proteins with peptides mapped                                                                                                            | 21,400      | 21,663      | 1.01           |
| (a) information in raw files                                                                                                                        |             |             |                |
| (b) spectra of sufficient quality to be scored                                                                                                      |             |             |                |
| * Araport11 but with updated plastid and mitochondrial encoded proteins (114 instead of 210 in original Araport11) and total size is 27559 proteins |             |             |                |

984

**Table 4.** Proteins identified in Araport11\* for each of the four confidence categories in build 2 for mitochondrial- (M) and plastid (C) chromosomes and the nuclear chromosomes (1-5).

| Chromosome*  | Entries | Canonical, n (%) |       | Uncertain, n (%) |       | Redundant , n (%) |      | Not Observed , n (%) |       |
|--------------|---------|------------------|-------|------------------|-------|-------------------|------|----------------------|-------|
|              |         | n                | %     | n                | %     | n                 | %    | n                    | %     |
| <b>M</b>     | 35      | 27               | 77.1% | 5                | 14.3% | 0                 | 0.0% | 3                    | 8.6%  |
| <b>C</b>     | 79      | 63               | 79.7% | 12               | 15.2% | 0                 | 0.0% | 4                    | 5.1%  |
| <b>1</b>     | 7156    | 4730             | 66.1% | 502              | 7.0%  | 384               | 5.4% | 1540                 | 21.5% |
| <b>2</b>     | 4317    | 2762             | 64.0% | 290              | 6.7%  | 240               | 5.6% | 1025                 | 23.7% |
| <b>3</b>     | 5460    | 3630             | 66.5% | 353              | 6.5%  | 296               | 5.4% | 1181                 | 21.6% |
| <b>4</b>     | 4180    | 2788             | 66.7% | 282              | 6.7%  | 247               | 5.9% | 863                  | 20.6% |
| <b>5</b>     | 6332    | 4267             | 67.4% | 412              | 6.5%  | 373               | 5.9% | 1280                 | 20.2% |
| <b>Total</b> | 27559   | 18267            | 66.3% | 1856             | 6.7%  | 1540              | 5.6% | 5896                 | 21.4% |

\* Araport11 but with updated plastid and mitochondrial encoded proteins (114 instead of 210 in original Araport11) and total size is 27559 proteins



**Table 5.** Peptides assigned to proteins by hierarchy of sources ranging from Araport11 to DECOY, with each peptide is assigned only to the highest source possible and then not to any other source.

| Hierarchy (a)                                                                                                | Primary Protein Match | No. of peptides | No. of PSMs | No. of Primary Proteins | No. of peptides (>=3 PSMs) | No. of PSMs (>=3 PSMs) | No. of Primary Proteins (>=3 PSMs) | No. of Primary Proteins (>=2 Distinct Peptides with >=3 PSMs) |
|--------------------------------------------------------------------------------------------------------------|-----------------------|-----------------|-------------|-------------------------|----------------------------|------------------------|------------------------------------|---------------------------------------------------------------|
| 1                                                                                                            | Araport11             | 595346          | 70409850    | 20876                   | 411364                     | 70166505               | 18860                              | 17056                                                         |
| 2                                                                                                            | TAIR10                | 438             | 33123       | 69                      | 271                        | 32908                  | 43                                 | 25                                                            |
| 3                                                                                                            | PSEUDOGENE            | 205             | 1264        | 126                     | 74                         | 1104                   | 54                                 | 9                                                             |
| 4                                                                                                            | UniProtKB             | 197             | 14408       | 38                      | 120                        | 14306                  | 28                                 | 15                                                            |
| 5                                                                                                            | RefSeq                | 0               | 0           | 0                       | 0                          | 0                      | 0                                  | 0                                                             |
| 6                                                                                                            | ARA-PEP:LW            | 101             | 519         | 82                      | 30                         | 440                    | 21                                 | 3                                                             |
| 7                                                                                                            | ARA-PEP:SIPs          | 5               | 17          | 5                       | 2                          | 14                     | 2                                  | 0                                                             |
| 8                                                                                                            | ARA-PEP:sORF          | 75              | 404         | 60                      | 29                         | 352                    | 18                                 | 3                                                             |
| 9                                                                                                            | IowaORFs              | 466             | 10409       | 157                     | 232                        | 10111                  | 61                                 | 26                                                            |
| 10                                                                                                           | CONTAM (b)            | 5217            | 1719466     | 95                      | 3577                       | 1717256                | 88                                 | 83                                                            |
| 11                                                                                                           | DECOY (c)             | 728             | 8001        | 654                     | 281                        | 7470                   | 269                                | 10                                                            |
| (a) Hierarchy refers to the order to which peptides are assigned to sources.                                 |                       |                 |             |                         |                            |                        |                                    |                                                               |
| (b) Contaminants often found in samples, e.g. BSA, Keratin, trypsin, etc                                     |                       |                 |             |                         |                            |                        |                                    |                                                               |
| (c) Decoys are all shuffled protein sequences in the search space; this enables accurate calculation of FDR. |                       |                 |             |                         |                            |                        |                                    |                                                               |

**Table 6.** PeptideAtlas detection of the ERFVII transcription factor members involved in oxygen sensing.

| Accession   | name    | PA Status                            | # PSMs & plant materials                                           | MW    | PI   | GRA VY | % rna detected | average TPM | highest TPM | probability DF | probability ANN |
|-------------|---------|--------------------------------------|--------------------------------------------------------------------|-------|------|--------|----------------|-------------|-------------|----------------|-----------------|
| AT3G16770.1 | RAP2.3  | Weak                                 | one Phosphopeptide – 2 PSMs (cell culture-phospho, callus-phospho) | 27.76 | 5.21 | -0.73  | 99.98          | 329         | 7877        | 0.997          | 0.939           |
| AT3G14230.1 | RAP2.2  | Marginally Distinguished AT1G53910.1 | two peptides – total 2 PSMs (cell culture)                         | 42.53 | 4.91 | -0.78  | 100.00         | 136         | 1932        | 1.000          | 0.969           |
| AT2G47520.1 | HRE2    | Weak                                 | one peptide – 3 PSMs (cell culture, callus)                        | 19.35 | 6.41 | -0.86  | 82.78          | 7           | 1202        | 0.883          | 0.793           |
| AT1G72360.1 | HRE1    | Weak                                 | one peptide – 2 PSMs (cell culture, flower)                        | 23.66 | 4.83 | -0.73  | 99.59          | 16          | 1375        | 0.737          | 0.928           |
| AT1G53910.1 | RAP2.12 | Canonical                            | five peptides – total 5 PSMs (Cell culture)                        | 39.8  | 5.19 | -0.74  | 100.00         | 148         | 1538        | 0.990          | 0.972           |

991

## 992 **FIGURE LEGENDS**

993

994 **Figure 1** Publicly available PXDs and mass spectrometry instrumentation for *Arabidopsis*  
995 *thaliana* in ProteomeXchange. A, Cumulative PXD available. B, Mass spectrometry instruments  
996 used to acquire data in these PXDs ('other' includes low resolution instruments such as LCQs,  
997 LTQs, QStar, as well as MALDI-TOF-TOF).

998

999 **Figure 2** Contributions of individual experiments to the PeptideAtlas Build. A, From the 369  
1000 experiments conducted, the graph displays the total number of distinct peptides for the build as  
1001 well as the number of peptides contributed by each experiment. B, The plot shows the  
1002 cumulative number of distinct proteins and the number of proteins that were contributed from  
1003 each experiment. The location where new datasets added since the first build is marked.

1004

1005 **Figure 3** N-terminal consensus sequence patterns of canonical nuclear-encoded proteins  
1006 accumulating with the initiating methionine or the 2<sup>nd</sup> residue (after methionine excision) with or  
1007 without NTA. A,B, Sequence logos of proteins (first 10 residues are shown) that are exclusively  
1008 found with the initiating methionine (A) or exclusively found with just this methionine removed  
1009 (B), irrespective of NTA. C,D, Sequence logos of NTA proteins (first 10 residues are shown)  
1010 exclusively accumulating with the initiating methionine (C) or exclusively found with the second  
1011 residue (methionine removed). E. Icelogo for NTA canonical proteins exclusively starting at  
1012 position 2 using all canonical protein starting exclusively at position 2, but irrespective of the  
1013 NTA status. Arrows indicate the observed N-terminal residue.

1014

1015 **Figure 4** Distributions of physicochemical properties of the 18079 canonical (green) and 5595  
1016 dark (purple) proteins. A,C,E, Absolute counts of proteins within each bin for canonical and dark  
1017 proteins. B,D,F, The proportion of canonical and dark proteins within each bin. A,B. Distributions  
1018 and proportions of the molecular weight (kDa) of canonical (green) and dark (purple) proteins.  
1019 Proteins with molecular weights between 0 and 80 kDa are shown. C,D. Distributions and  
1020 proportions of the hydrophobicity (gravy score) of canonical (green) and dark (purple) proteins.  
1021 Proteins with gravy score between -2.0 (hydrophilic) and 2.0 (very hydrophobic) are shown. E,F.  
1022 Distributions and proportions of the isoelectric point (pI) of canonical (green) and dark (purple)  
1023 proteins. Proteins with pI between 4.0 (acidic) and 12 (very basic) are shown.

1024

1025 **Figure 5** Transcript abundance and observation frequency of 26975 nuclear-encoded protein  
1026 coding genes in 5673 high quality RNA-seq datasets. A,B, Distributions of the percentage of  
1027 RNA-seq datasets with detected transcripts associated with the canonical (green) and dark  
1028 (purple) proteins. A, Absolute counts of proteins within each bin and B, proportion of light and  
1029 dark proteins within each bin. C,D, Distributions of the maximum transcripts per million (TPM)  
1030 among all RNA-seq experiments for the detected transcripts associated with the canonical  
1031 (green) and dark (purple) proteins. Absolute counts of proteins within each bin (C) and the  
1032 proportion of light and dark proteins within each bin (D). The number of TPM extends as high as  
1033 207,000 for seed storage protein albumin 3 (AT4G27160), followed by seed storage cruciferin 1  
1034 and 3 (AT5G44120 and AT4G28520), Rubisco small subunit 1A (AT1G67090) and the  
1035 hypothetical very small (33 aa) protein AT2G01021.

1036  
1037 **Figure 6** Machine learning models (ANN and TF-DF) to predict the probability of Arabidopsis  
1038 proteins to be detected at the canonical levels in build 2. A-D, ROC curves for TF-DF models  
1039 (A,B) or ANN (C,D) models trained on protein physicochemical properties and RNA expression  
1040 data. A higher percentage of area under the curve (AUC) signifies better accuracy whereas an  
1041 AUC of 0.5 (denoted by the dotted navy line) signifies near random prediction. As shown, %  
1042 RNA detected, molecular\_weight, and highest TPM enhance the performance of an ANN model,  
1043 whereas pl and gravity barely impact it. B,D, ROC curves of TF-DF (B) and ANN (D) models  
1044 trained on 10 randomized subsets of the same size from the input data. The accuracy of the TF-  
1045 DF and ANN models are consistently around 93% and 92%, respectively. E, Feature  
1046 importance. The TF-DF model has several built-in methods that calculate the significance of  
1047 features to a model's performance.

1048  
1049 **Figure 7** Hypothetical and unknown/DUF proteins in the dark and canonical proteome and their  
1050 predictions to be canonical. All canonical and unobserved proteins were scored for the presence  
1051 of the words “hypothetical”, “unknown” or “Domain of Unknown Function (DUF)” in their  
1052 description from Araport11/TAIR. A, Hypothetical and unknown proteins in the dark and  
1053 canonical proteome. B, Predicted observability for the hypothetical proteins to be canonical  
1054 using the two machine leaning models (DF and ANN).

1055  
1056 **Figure 8** GO enrichment of the 5595 dark proteins compare to all predicted Arabidopsis  
1057 proteins for Biological Process and Molecular function. A,B, The 20 most significant GO terms

1058 (lowest FDR) are shown, ordered by fold enrichment for biological process (A) and molecular  
1059 function (B)

1060

1061 **Figure 9** Identification status of members of different signaling peptide families in build 2. A,  
1062 Overall identification status across 8 confidence tiers of the 330 signaling peptide producing  
1063 proteins (Supplemental Data Set S11). The tiers system is described in more detail in (van Wijk  
1064 et al., 2021). Identified protein with status 'weak' have at least one uniquely mapping peptide of  
1065 9 amino acid residues but does not meet the criteria for canonical (at least 2 uniquely mapping  
1066 non-nested peptides of at least 9 residues with at least 18 residues of total coverage). B, Bar  
1067 diagrams of proteins within each of the peptide signaling families. Color coding within each bar  
1068 indicates the number of proteins not-observed (black), weak (yellow), canonical (blue) or in  
1069 other tiers (gray). \* indicates cysteine rich peptides. PTMs indicates known presence of PTMs of  
1070 signaling peptides. C, Listing all families, identification level and precursor length (range and  
1071 median)

1072

1073 **Figure 10** GO enrichment of 222 outlier dark proteins compare to all 5595 dark proteins or  
1074 Biological Process and Molecular function. The outliers are defined as dark proteins having a  
1075 predicted probability to be canonical of  $>0.8$  by both machine learning models. A,B, The 20  
1076 most significant GO terms (lowest FDR) are shown, ordered by fold enrichment for biological  
1077 process (A) and molecular function (B).

1078

1079 **Figure 11** The relation between the number of identified spectra and newly identified canonical  
1080 proteins for each of the 63 new PXDs that we added for build 2. Key information of the sample  
1081 type is shown. Newly identified canonical proteins are proteins that were not yet identified as  
1082 canonicals in build 1 or PXDs in build 2 with lower number. MS instruments used are:  
1083 PXD016575 – Q Exactive HF-X; PXD007054 - LTQ Orbitrap Velos; PXD026180 - LTQ, Q  
1084 Exactive HF, Q Exactive and LTQ FT Ultra; PXD015624 – Q Exactive, PXD0119330 - Orbitrap  
1085 Velos Pro; PXD0002297 – Q Exactive.

1086

## 1087 **SUPPLEMENTAL DATA**

1088 **Supplemental Data Set S1.** Comprehensive overview of the 115 PXDs and their 369  
1089 experiments used for build 2. This includes key metadata as well as summaries of search  
1090 results.

1091

1092 **Supplemental Data Set S2.** Transcript per million (TPM) expression values of 26975 predicted  
1093 nuclear protein coding genes in Araport11 and the number of RNA-seq data sets (total 5673  
1094 filtered datasets) in which they are transcribed (A). Note that 398 genes were not transcribed (or  
1095 available due to overlapping genes or sequence similarity (B) in any of the RNA-seq datasets  
1096 and an additional 345 protein coding genes were never expressed above the median (C).

1097

1098 **Supplemental Data Set S3.** Proteins identified in non-Araport11 sources by hierarchy of  
1099 sources (for hierarchy see Table 5)

1100

1101 **Supplemental Data Set S4.** Identification of N-terminal acetylation (NTA) sites in canonical  
1102 proteins in PeptideAtlas. NTA sites per protein identifier. For each NTA site, the # of PSMs are  
1103 listed at different PTM score interval (0.95 <p<0.99; 0.99 <p<1.0; no choice), as well as the  
1104 sum of PSMs.

1105

1106 **Supplemental Data Set S5.** Identification of lysine acetylation (Kac) sites in canonical proteins  
1107 in PeptideAtlas. A, For each Kac site, the # of PSMs are listed at different PTM score interval  
1108 (0.95 <p<0.99; 0.99 <p<1.0; no choice), as well as the sum of PSMs. B, Non-redundant set of  
1109 proteins with their number of observed Kac sites and total PSMs.

1110

1111 **Supplemental Data Set S6.** Identification of phosphorylation (S,T,Y) sites in canonical proteins  
1112 in PeptideAtlas. A, Summarizing information of detected phosphorylation sites. For each p-site,  
1113 the # of PSMs are listed at different PTM score interval (0.95 <p<0.99; 0.99 <p<1.0; no choice),  
1114 as well as the sum of PSMs. B, Summarizing information of phosphorylated proteins with one  
1115 or more phospho-sites.

1116

1117 **Supplemental Data Set S7.** Identification of Ubiquitination sites in canonical proteins in  
1118 PeptideAtlas. A, Summarizing information of detected UBI sites. For each UBI-site, the # of  
1119 PSMs are listed at different PTM score interval (0.95 <p<0.99; 0.99 <p<1.0; no choice), as well  
1120 as the sum of PSMs. B, Summarizing information of detected UBI sites identified by both the  
1121 GLY and diGLY method. For each UBI-site, the # of PSMs are listed at different PTM score  
1122 interval (0.95 <p<0.99; 0.99 <p<1.0; no choice), as well as the sum of PSMs. C, Summarizing  
1123 information of UBI proteins with one or more UBI sites.

1124

1125 **Supplemental Data Set S8.** Combined PTM results for the canonical proteins in PeptideAtlas  
1126 with identified PTM sites for N-terminal acetylation, lysine acetylation, phosphorylation and/or  
1127 ubiquitination. Listed are the protein identifiers and their annotations, NTA sites, K-ac sites,  
1128 phosphor sites, UBI sites. Indicated are the amino acid residues position(s) for each PTM and  
1129 total number of PSMs for each PTM across these positions.

1130

1131 **Supplemental Data Set S9.** Nuclear-encoded proteins Araport11 identifiers (26977) with  
1132 annotations, protein properties, RNA-seq-based transcript information, machine learning  
1133 predicted probability to be canonical and identification status in PeptideAtlas.

1134

1135 **Supplemental Data Set S10.** GO enrichment results of dark proteins. A,B. GO enrichments  
1136 and associate genes identifiers for the dark proteins compared to all Arabidopsis proteins.  
1137 Top20 most significant for BP and MF are listed. C,D. GO enrichment and associated gene  
1138 identifies for the 222 outlier dark proteins compared to all 5595 dark proteins.

1139

1140 **Supplemental Data Set S11.** Proteins coding for signaling peptides, their annotations,  
1141 physicochemical properties, RNA expression patterns and identification status in PeptideAtlas.

1142

1143 **Supplemental Figure S1.** Plotted values from Table 2. (A) For each of the 115 datasets in the  
1144 build, there is no apparent correlation between the number between the identification efficiency  
1145 (%spectra IDed) and the size of the experiment (spectra searched). (B) Displays a strong  
1146 positive correlation, signifying the more spectra searched, the greater MS runs there are. (C)  
1147 Shows a tight positive correlation, displaying the more spectra searched the higher the number  
1148 of distinct peptides.

1149

1150 **Supplemental Figure S2.** Plotted values from Table 2. (A) For each 115 datasets in the build,  
1151 there is no apparent correlation for the number of %spectra IDed vs spectra searched, between  
1152 the identification efficiency and the size of the experiment. (B) Displays a strong positive  
1153 correlation, signifying the more spectra searched, the greater MS runs there are. (C) Shows a  
1154 tight positive correlation, displaying the more spectra searched the higher the number of distinct  
1155 peptides. (D) A positive correlation between spectra searched and distinct canonical proteins  
1156 can be observed.

1157

1158

1159

## REFERENCES

- 1160  
1161
- 1162 **Abbas M, Sharma G, Dambire C, Marquez J, Alonso-Blanco C, Proano K, Holdsworth MJ**  
1163 (2022) An oxygen-sensing mechanism for angiosperm adaptation to altitude. *Nature*  
1164 **606**: 565-569
- 1165 **Alex Mason G, Canto-Pastor A, Brady SM, Provart NJ** (2021) Bioinformatic Tools in  
1166 *Arabidopsis* Research. *Methods Mol Biol* **2200**: 25-89
- 1167 **Ashburner M, Ball CA, Blake JA, Botstein D, Butler H, Cherry JM, Davis AP, Dolinski K,**  
1168 **Dwight SS, Eppig JT, Harris MA, Hill DP, Issel-Tarver L, Kasarskis A, Lewis S,**  
1169 **Matese JC, Richardson JE, Ringwald M, Rubin GM, Sherlock G** (2000) Gene  
1170 ontology: tool for the unification of biology. The Gene Ontology Consortium. *Nat Genet*  
1171 **25**: 25-29
- 1172 **Balparda M, Elsasser M, Badia MB, Giese J, Bovdilova A, Hudig M, Reinmuth L, Eirich J,**  
1173 **Schwarzlander M, Finkemeier I, Schallenberg-Rudinger M, Maurino VG** (2022)  
1174 Acetylation of conserved lysines fine-tunes mitochondrial malate dehydrogenase activity  
1175 in land plants. *Plant J* **109**: 92-111
- 1176 **Barreto P, Dambire C, Sharma G, Vicente J, Osborne R, Yassitepe J, Gibbs DJ, Maia IG,**  
1177 **Holdsworth MJ, Arruda P** (2022) Mitochondrial retrograde signaling through UCP1-  
1178 mediated inhibition of the plant oxygen-sensing pathway. *Curr Biol* **32**: 1403-1411 e1404
- 1179 **Bartels S, Lori M, Mbengue M, van Verk M, Klauser D, Hander T, Boni R, Robotzek S,**  
1180 **Boller T** (2013) The family of Peps and their precursors in *Arabidopsis*: differential  
1181 expression and localization but similar induction of pattern-triggered immune responses.  
1182 *J Exp Bot* **64**: 5309-5321
- 1183 **Bassal M, Abukhalaf M, Majovsky P, Thieme D, Herr T, Ayash M, Tabassum N, Al Shweiki**  
1184 **MR, Proksch C, Hmedat A, Ziegler J, Lee J, Neumann S, Hoehenwarter W** (2020)  
1185 Reshaping of the *Arabidopsis thaliana* Proteome Landscape and Co-regulation of  
1186 Proteins in Development and Immunity. *Mol Plant* **13**: 1709-1732
- 1187 **Berger N, Vignols F, Przybyla-Toscano J, Roland M, Rofidal V, Touraine B, Zienkiewicz K,**  
1188 **Couturier J, Feussner I, Santoni V, Rouhier N, Gaymard F, Dubos C** (2020)  
1189 Identification of client iron-sulfur proteins of the chloroplastic NFU2 transfer protein in  
1190 *Arabidopsis thaliana*. *J Exp Bot* **71**: 4171-4187
- 1191 **Bienvenut WV, Brunje A, Boyer JB, Muhlenbeck JS, Bernal G, Lassowskat I, Dian C,**  
1192 **Linster E, Dinh TV, Koskela MM, Jung V, Seidel J, Schyrba LK, Ivanauskaite A,**  
1193 **Eirich J, Hell R, Schwarzer D, Mulo P, Wirtz M, Meinnel T, Giglione C, Finkemeier I**



- 1194 (2020) Dual lysine and N-terminal acetyltransferases reveal the complexity underpinning  
1195 protein acetylation. *Mol Syst Biol* **16**: e9464
- 1196 **Birnbaum KD, Otegui MS, Bailey-Serres J, Rhee SY** (2022) The Plant Cell Atlas: focusing  
1197 new technologies on the kingdom that nourishes the planet. *Plant Physiol* **188**: 675-679
- 1198 **Chambers MC, Maclean B, Burke R, Amodei D, Ruderman DL, Neumann S, Gatto L,**  
1199 **Fischer B, Pratt B, Egertson J, Hoff K, Kessner D, Tasman N, Shulman N, Frewen**  
1200 **B, Baker TA, Brusniak MY, Paulse C, Creasy D, Flashner L, Kani K, Moulding C,**  
1201 **Seymour SL, Nuwaysir LM, Lefebvre B, Kuhlmann F, Roark J, Rainer P, Detlev S,**  
1202 **Hemenway T, Huhmer A, Langridge J, Connolly B, Chadick T, Holly K, Eckels J,**  
1203 **Deutsch EW, Moritz RL, Katz JE, Agus DB, MacCoss M, Tabb DL, Mallick P** (2012)  
1204 A cross-platform toolkit for mass spectrometry and proteomics. *Nat Biotechnol* **30**: 918-  
1205 920
- 1206 **Chen X, Sun Y, Zhang T, Shu L, Roepstorff P, Yang F** (2021) Quantitative Proteomics Using  
1207 Isobaric Labeling: A Practical Guide. *Genomics Proteomics Bioinformatics* **19**: 689-706
- 1208 **Cheng CY, Krishnakumar V, Chan AP, Thibaud-Nissen F, Schobel S, Town CD** (2017)  
1209 Araport11: a complete reannotation of the Arabidopsis thaliana reference genome. *Plant*  
1210 *J* **89**: 789-804
- 1211 **Chi W, He B, Mao J, Jiang J, Zhang L** (2015) Plastid sigma factors: Their individual functions  
1212 and regulation in transcription. *Biochim Biophys Acta* **1847**: 770-778
- 1213 **Dahhan DA, Reynolds GD, Cardenas JJ, Eeckhout D, Johnson A, Yperman K, Kaufmann**  
1214 **WA, Vang N, Yan X, Hwang I, Heese A, De Jaeger G, Friml J, Van Damme D, Pan J,**  
1215 **Bednarek SY** (2022) Proteomic characterization of isolated Arabidopsis clathrin-coated  
1216 vesicles reveals evolutionarily conserved and plant-specific components. *Plant Cell* **34**:  
1217 2150-2173
- 1218 **Deutsch EW, Bandeira N, Perez-Riverol Y, Sharma V, Carver JJ, Mendoza L, Kundu DJ,**  
1219 **Wang S, Bandla C, Kamatchinathan S, Hewapathirana S, Pullman BS, Wertz J, Sun**  
1220 **Z, Kawano S, Okuda S, Watanabe Y, MacLean B, MacCoss MJ, Zhu Y, Ishihama Y,**  
1221 **Vizcaino JA** (2023) The ProteomeXchange consortium at 10 years: 2023 update.  
1222 *Nucleic Acids Res* **51**: D1539-D1548
- 1223 **Deutsch EW, Mendoza L, Shteynberg D, Slagel J, Sun Z, Moritz RL** (2015) Trans-Proteomic  
1224 Pipeline, a standardized data processing pipeline for large-scale reproducible  
1225 proteomics informatics. *Proteomics Clin Appl* **9**: 745-754
- 1226 **Deutsch EW, Mendoza L, Shteynberg DD, Hoopmann MR, Sun Z, Eng JK, Moritz RL**  
1227 (2023) Trans-Proteomic Pipeline: Robust Mass Spectrometry-Based Proteomics Data

- 1228 Analysis Suite. *J Proteome Res* doi: **10.1021/acs.jproteome.2c00748**. Online ahead  
1229 of print.
- 1230 **Deutsch EW, Overall CM, Van Eyk JE, Baker MS, Paik YK, Weintraub ST, Lane L, Martens**  
1231 **L, Vandenbrouck Y, Kusebauch U, Hancock WS, Hermjakob H, Aebersold R,**  
1232 **Moritz RL, Omenn GS** (2016) Human Proteome Project Mass Spectrometry Data  
1233 Interpretation Guidelines 2.1. *J Proteome Res* **15**: 3961-3970
- 1234 **Dinh TV, Bienvenut WV, Linster E, Feldman-Salit A, Jung VA, Meinnel T, Hell R, Giglione**  
1235 **C, Wirtz M** (2015) Molecular identification and functional characterization of the first  
1236 Nalpha-acetyltransferase in plastids by global acetylome profiling. *Proteomics* **15**: 2426-  
1237 2435
- 1238 **Eng JK, Deutsch EW** (2020) Extending Comet for Global Amino Acid Variant and Post-  
1239 Translational Modification Analysis Using the PSI Extended FASTA Format. *Proteomics*  
1240 **20**: e1900362
- 1241 **Frankenfield AM, Ni J, Ahmed M, Hao L** (2022) Protein Contaminants Matter: Building  
1242 Universal Protein Contaminant Libraries for DDA and DIA Proteomics. *J Proteome Res*  
1243 **21**: 2104-2113
- 1244 **Fujita S** (2021) CASPARIAN STRIP INTEGRITY FACTOR (CIF) family peptides - regulator of  
1245 plant extracellular barriers. *Peptides* **143**: 170599
- 1246 **Fussl M, Konig AC, Eirich J, Hartl M, Kleinknecht L, Bohne AV, Harzen A, Kramer K,**  
1247 **Leister D, Nickelsen J, Finkemeier I** (2022) Dynamic light- and acetate-dependent  
1248 regulation of the proteome and lysine acetylome of *Chlamydomonas*. *Plant J* **109**: 261-  
1249 277
- 1250 **Ge SX, Jung D, Yao R** (2020) ShinyGO: a graphical gene-set enrichment tool for animals and  
1251 plants. *Bioinformatics* **36**: 2628-2629
- 1252 **Gene Ontology C** (2021) The Gene Ontology resource: enriching a GOld mine. *Nucleic Acids*  
1253 *Res* **49**: D325-D334
- 1254 **Gevaert K, Goethals M, Martens L, Van Damme J, Staes A, Thomas GR, Vandekerckhove**  
1255 **J** (2003) Exploring proteomes and analyzing protein processing by mass spectrometric  
1256 identification of sorted N-terminal peptides. *Nat Biotechnol* **21**: 566-569
- 1257 **Gibbs DJ, Conde JV, Berckhan S, Prasad G, Mendiondo GM, Holdsworth MJ** (2015) Group  
1258 VII Ethylene Response Factors Coordinate Oxygen and Nitric Oxide Signal Transduction  
1259 and Stress Responses in Plants. *Plant Physiol* **169**: 23-31
- 1260 **Giglione C, Boularot A, Meinnel T** (2004) Protein N-terminal methionine excision. *Cell Mol Life*  
1261 *Sci* **61**: 1455-1474

- 1262 **Grubb LE, Derbyshire P, Dunning KE, Zipfel C, Menke FLH, Monaghan J** (2021) Large-  
1263 scale identification of ubiquitination sites on membrane-associated proteins in  
1264 *Arabidopsis thaliana* seedlings. *Plant Physiol* **185**: 1483-1488
- 1265 **Gunaratne J, Schmidt A, Quandt A, Neo SP, Sarac OS, Gracia T, Loguercio S, Ahrne E,**  
1266 **Xia RL, Tan KH, Lossner C, Bahler J, Beyer A, Blackstock W, Aebersold R** (2013)  
1267 Extensive mass spectrometry-based analysis of the fission yeast proteome: the  
1268 *Schizosaccharomyces pombe* PeptideAtlas. *Mol Cell Proteomics* **12**: 1741-1751
- 1269 **Guo Y, Xiong L, Ishitani M, Zhu JK** (2002) An *Arabidopsis* mutation in translation elongation  
1270 factor 2 causes superinduction of CBF/DREB1 transcription factor genes but blocks the  
1271 induction of their downstream targets under low temperatures. *Proc Natl Acad Sci U S A*  
1272 **99**: 7786-7791
- 1273 **Hains PG, Robinson PJ** (2017) The Impact of Commonly Used Alkylating Agents on Artfactual  
1274 Peptide Modification. *J Proteome Res* **16**: 3443-3447
- 1275 **Hammarlund EU, Flashman E, Mohlin S, Licausi F** (2020) Oxygen-sensing mechanisms  
1276 across eukaryotic kingdoms and their roles in complex multicellularity. *Science* **370**
- 1277 **Hawkins CL, Davies MJ** (2019) Detection, identification, and quantification of oxidative protein  
1278 modifications. *J Biol Chem* **294**: 19683-19708
- 1279 **Hazarika RR, De Coninck B, Yamamoto LR, Martin LR, Cammue BP, van Noort V** (2017)  
1280 ARA-PEPs: a repository of putative sORF-encoded peptides in *Arabidopsis thaliana*.  
1281 *BMC Bioinformatics* **18**: 37
- 1282 **Hesselager MO, Codrea MC, Sun Z, Deutsch EW, Bennike TB, Stensballe A, Bundgaard L,**  
1283 **Moritz RL, Bendixen E** (2016) The Pig PeptideAtlas: A resource for systems biology in  
1284 animal production and biomedicine. *Proteomics* **16**: 634-644
- 1285 **Hodge K, Have ST, Hutton L, Lamond AI** (2013) Cleaning up the masses: exclusion lists to  
1286 reduce contamination with HPLC-MS/MS. *J Proteomics* **88**: 92-103
- 1287 **Hooper CM, Castleden IR, Tanz SK, Aryamanesh N, Millar AH** (2017) SUBA4: the interactive  
1288 data analysis centre for *Arabidopsis* subcellular protein locations. *Nucleic Acids Res* **45**:  
1289 D1064-D1074
- 1290 **Hsu JL, Huang SY, Chow NH, Chen SH** (2003) Stable-isotope dimethyl labeling for  
1291 quantitative proteomics. *Anal Chem* **75**: 6843-6852
- 1292 **Hu XL, Lu H, Hassan MM, Zhang J, Yuan G, Abraham PE, Shrestha HK, Villalobos Solis**  
1293 **MI, Chen JG, Tschaplinski TJ, Doktycz MJ, Tuskan GA, Cheng ZM, Yang X** (2021)  
1294 Advances and perspectives in discovery and functional analysis of small secreted  
1295 proteins in plants. *Hortic Res* **8**: 130

- 1296 **Huang A, Tang Y, Shi X, Jia M, Zhu J, Yan X, Chen H, Gu Y** (2020) Proximity labeling  
1297 proteomics reveals critical regulators for inner nuclear membrane protein degradation in  
1298 plants. *Nat Commun* **11**: 3284
- 1299 **Huang S, Taylor NL, Whelan J, Millar AH** (2009) Refining the definition of plant mitochondrial  
1300 presequences through analysis of sorting signals, N-terminal modifications, and  
1301 cleavage motifs. *Plant Physiol* **150**: 1272-1285
- 1302 **Huffaker A, Pearce G, Ryan CA** (2006) An endogenous peptide signal in Arabidopsis activates  
1303 components of the innate immune response. *Proc Natl Acad Sci U S A* **103**: 10098-  
1304 10103
- 1305 **Hulstaert N, Shofstahl J, Sachsenberg T, Walzer M, Barsnes H, Martens L, Perez-Riverol**  
1306 **Y** (2020) ThermoRawFileParser: Modular, Scalable, and Cross-Platform RAW File  
1307 Conversion. *J Proteome Res* **19**: 537-542
- 1308 **Kaufmann C, Sauter M** (2019) Sulfated plant peptide hormones. *J Exp Bot* **70**: 4267-4277
- 1309 **Keller A, Eng J, Zhang N, Li XJ, Aebersold R** (2005) A uniform proteomics MS/MS analysis  
1310 platform utilizing open XML file formats. *Mol Syst Biol* **1**: 2005 0017
- 1311 **Keller A, Nesvizhskii AI, Kolker E, Aebersold R** (2002) Empirical statistical model to estimate  
1312 the accuracy of peptide identifications made by MS/MS and database search. *Anal*  
1313 *Chem* **74**: 5383-5392
- 1314 **Kim JS, Jeon BW, Kim J** (2021) Signaling Peptides Regulating Abiotic Stress Responses in  
1315 Plants. *Front Plant Sci* **12**: 704490
- 1316 **Kim MS, Zhong J, Pandey A** (2016) Common errors in mass spectrometry-based analysis of  
1317 post-translational modifications. *Proteomics* **16**: 700-714
- 1318 **King NL, Deutsch EW, Ranish JA, Nesvizhskii AI, Eddes JS, Mallick P, Eng J, Desiere F,**  
1319 **Flory M, Martin DB, Kim B, Lee H, Raught B, Aebersold R** (2006) Analysis of the  
1320 *Saccharomyces cerevisiae* proteome with PeptideAtlas. *Genome Biol* **7**: R106
- 1321 **Kleifeld O, Doucet A, Prudova A, auf dem Keller U, Gioia M, Kizhakkedathu JN, Overall**  
1322 **CM** (2011) Identifying and quantifying proteolytic events and the natural N terminome by  
1323 terminal amine isotopic labeling of substrates. *Nat Protoc* **6**: 1578-1611
- 1324 **Kong AT, Leprevost FV, Avtonomov DM, Mellacheruvu D, Nesvizhskii AI** (2017)  
1325 MSFragger: ultrafast and comprehensive peptide identification in mass spectrometry-  
1326 based proteomics. *Nat Methods* **14**: 513-520
- 1327 **Koornneef M, Meinke D** (2011) The development of Arabidopsis as a model plant. *Plant J* **61**:  
1328 909-921

- 1329 **Kyte J, Doolittle RF** (1982) A simple method for displaying the hydropathic character of a  
1330 protein. *J Mol Biol* **157**: 105-132
- 1331 **Lamesch P, Berardini TZ, Li D, Swarbreck D, Wilks C, Sasidharan R, Muller R, Dreher K,**  
1332 **Alexander DL, Garcia-Hernandez M, Karthikeyan AS, Lee CH, Nelson WD, Ploetz L,**  
1333 **Singh S, Wensel A, Huala E** (2012) The Arabidopsis Information Resource (TAIR):  
1334 improved gene annotation and new tools. *Nucleic Acids Res* **40**: D1202-1210
- 1335 **Li W, O'Neill KR, Haft DH, DiCuccio M, Chetvernin V, Badretdin A, Coulouris G, Chitsaz F,**  
1336 **Derbyshire MK, Durkin AS, Gonzales NR, Gwadz M, Lanczycki CJ, Song JS,**  
1337 **Thanki N, Wang J, Yamashita RA, Yang M, Zheng C, Marchler-Bauer A, Thibaud-**  
1338 **Nissen F** (2021) RefSeq: expanding the Prokaryotic Genome Annotation Pipeline reach  
1339 with protein family model curation. *Nucleic Acids Res* **49**: 1020-1028
- 1340 **Liao Y, Smyth GK, Shi W** (2014) featureCounts: an efficient general purpose program for  
1341 assigning sequence reads to genomic features. *Bioinformatics* **30**: 923-930
- 1342 **Ma J, Chen T, Wu S, Yang C, Bai M, Shu K, Li K, Zhang G, Jin Z, He F, Hermjakob H, Zhu**  
1343 **Y** (2019) iProX: an integrated proteome resource. *Nucleic Acids Res* **47**: D1211-D1217
- 1344 **Maddelein D, Colaert N, Buchanan I, Hulstaert N, Gevaert K, Martens L** (2015) The iceLogo  
1345 web server and SOAP service for determining protein consensus sequences. *Nucleic*  
1346 *Acids Res* **43**: W543-546
- 1347 **Malmstrom J, Beck M, Schmidt A, Lange V, Deutsch EW, Aebersold R** (2009) Proteome-  
1348 wide cellular protein concentrations of the human pathogen *Leptospira interrogans*.  
1349 *Nature* **460**: 762-765
- 1350 **Martens L, Chambers M, Sturm M, Kessner D, Levander F, Shofstahl J, Tang WH, Rompp**  
1351 **A, Neumann S, Pizarro AD, Montecchi-Palazzi L, Tasman N, Coleman M, Reisinger**  
1352 **F, Souda P, Hermjakob H, Binz PA, Deutsch EW** (2011) mzML--a community  
1353 standard for mass spectrometry data. *Mol Cell Proteomics* **10**: R110 000133
- 1354 **Matsubayashi Y** (2014) Posttranslationally modified small-peptide signals in plants. *Annu Rev*  
1355 *Plant Biol* **65**: 385-413
- 1356 **McCord J, Sun Z, Deutsch EW, Moritz RL, Muddiman DC** (2017) The PeptideAtlas of the  
1357 Domestic Laying Hen. *J Proteome Res* **16**: 1352-1363
- 1358 **Medina J, Ballesteros ML, Salinas J** (2007) Phylogenetic and functional analysis of  
1359 *Arabidopsis* RCI2 genes. *J Exp Bot* **58**: 4333-4346
- 1360 **Meinke DW, Cherry JM, Dean C, Rounsley SD, Koornneef M** (1998) *Arabidopsis thaliana*: a  
1361 model plant for genome analysis. *Science* **282**: 662, 679-682

- 1362 **Meinzel T, Giglione C** (2022) N-terminal modifications, the associated processing machinery,  
1363 and their evolution in plastid-containing organisms. *J Exp Bot* **73**: 6013-6033
- 1364 **Mergner J, Frejno M, List M, Papacek M, Chen X, Chaudhary A, Samaras P, Richter S,**  
1365 **Shikata H, Messerer M, Lang D, Altmann S, Cyprys P, Zolg DP, Mathieson T,**  
1366 **Bantscheff M, Hazarika RR, Schmidt T, Dawid C, Dunkel A, Hofmann T, Sprunck S,**  
1367 **Falter-Braun P, Johannes F, Mayer KFX, Jurgens G, Wilhelm M, Baumbach J, Grill**  
1368 **E, Schneitz K, Schwechheimer C, Kuster B** (2020) Mass-spectrometry-based draft of  
1369 the Arabidopsis proteome. *Nature* **579**: 409-414
- 1370 **Michalik S, Depke M, Murr A, Gesell Salazar M, Kusebauch U, Sun Z, Meyer TC, Surmann**  
1371 **K, Pfortner H, Hildebrandt P, Weiss S, Palma Medina LM, Gutjahr M, Hammer E,**  
1372 **Becher D, Pribyl T, Hammerschmidt S, Deutsch EW, Bader SL, Hecker M, Moritz**  
1373 **RL, Mader U, Volker U, Schmidt F** (2017) A global *Staphylococcus aureus* proteome  
1374 resource applied to the in vivo characterization of host-pathogen interactions. *Sci Rep* **7**:  
1375 9718
- 1376 **Moriya Y, Kawano S, Okuda S, Watanabe Y, Matsumoto M, Takami T, Kobayashi D,**  
1377 **Yamanouchi Y, Araki N, Yoshizawa AC, Tabata T, Iwasaki M, Sugiyama N, Tanaka**  
1378 **S, Goto S, Ishihama Y** (2019) The jPOST environment: an integrated proteomics data  
1379 repository and database. *Nucleic Acids Res* **47**: D1218-D1224
- 1380 **Muller T, Winter D** (2017) Systematic Evaluation of Protein Reduction and Alkylation Reveals  
1381 Massive Unspecific Side Effects by Iodine-containing Reagents. *Mol Cell Proteomics* **16**:  
1382 1173-1187
- 1383 **Nissa MU, Reddy PJ, Pinto N, Sun Z, Ghosh B, Moritz RL, Goswami M, Srivastava S**  
1384 (2022) The PeptideAtlas of a widely cultivated fish *Labeo rohita*: A resource for the  
1385 Aquaculture Community. *Sci Data* **9**: 171
- 1386 **Niu B, Martinelli li M, Jiao Y, Wang C, Cao M, Wang J, Meinke E** (2020) Nonspecific  
1387 cleavages arising from reconstitution of trypsin under mildly acidic conditions. *PLoS One*  
1388 **15**: e0236740
- 1389 **Olsson V, Joos L, Zhu S, Gevaert K, Butenko MA, De Smet I** (2019) Look Closely, the  
1390 Beautiful May Be Small: Precursor-Derived Peptides in Plants. *Annu Rev Plant Biol* **70**:  
1391 153-186
- 1392 **Omenn GS, Lane L, Overall CM, Paik YK, Cristea IM, Corrales FJ, Lindskog C, Weintraub**  
1393 **S, Roehrl MHA, Liu S, Bandeira N, Srivastava S, Chen YJ, Aebersold R, Moritz RL,**  
1394 **Deutsch EW** (2021) Progress Identifying and Analyzing the Human Proteome: 2021  
1395 Metrics from the HUPO Human Proteome Project. *J Proteome Res* **20**: 5227-5240

- 1396 **Palos K, Nelson Dittrich AC, Yu L, Brock JR, Railey CE, Wu HL, Sokolowska E, Skiryecz A,**  
1397 **Hsu PY, Gregory BD, Lyons E, Beilstein MA, Nelson ADL** (2022) Identification and  
1398 functional annotation of long intergenic non-coding RNAs in Brassicaceae. *Plant Cell* **34**:  
1399 3233-3260
- 1400 **Parry G, Provart NJ, Brady SM, Uzilday B, Multinational Arabidopsis Steering C** (2020)  
1401 Current status of the multinational Arabidopsis community. *Plant Direct* **4**: e00248
- 1402 **Perez-Riverol Y, Bai J, Bandla C, Garcia-Seisdedos D, Hewapathirana S, Kamatchinathan**  
1403 **S, Kundu DJ, Prakash A, Frericks-Zipper A, Eisenacher M, Walzer M, Wang S,**  
1404 **Brazma A, Vizcaino JA** (2022) The PRIDE database resources in 2022: a hub for mass  
1405 spectrometry-based proteomics evidences. *Nucleic Acids Res* **50**: D543-D552
- 1406 **Perez-Riverol Y, Csordas A, Bai J, Bernal-Llinares M, Hewapathirana S, Kundu DJ,**  
1407 **Inuganti A, Griss J, Mayer G, Eisenacher M, Perez E, Uszkoreit J, Pfeuffer J,**  
1408 **Sachsenberg T, Yilmaz S, Tiwary S, Cox J, Audain E, Walzer M, Jarnuczak AF,**  
1409 **Ternent T, Brazma A, Vizcaino JA** (2018) The PRIDE database and related tools and  
1410 resources in 2019: improving support for quantification data. *Nucleic Acids Res* **47**:  
1411 D442-D450
- 1412 **Plant Cell Atlas C, Jha SG, Borowsky AT, Cole BJ, Fahlgren N, Farmer A, Huang SC,**  
1413 **Karia P, Libault M, Provart NJ, Rice SL, Saura-Sanchez M, Agarwal P, Ahkami AH,**  
1414 **Anderton CR, Briggs SP, Brophy JA, Denolf P, Di Costanzo LF, Exposito-Alonso**  
1415 **M, Giacomello S, Gomez-Cano F, Kaufmann K, Ko DK, Kumar S, Malkovskiy AV,**  
1416 **Nakayama N, Obata T, Otegui MS, Palfalvi G, Quezada-Rodriguez EH, Singh R,**  
1417 **Uhrig RG, Waese J, Van Wijk K, Wright RC, Ehrhardt DW, Birnbaum KD, Rhee SY**  
1418 (2021) Vision, challenges and opportunities for a Plant Cell Atlas. *Elife* **10**
- 1419 **Pozoga M, Armbruster L, Wirtz M** (2022) From Nucleus to Membrane: A Subcellular Map of  
1420 the N-Acetylation Machinery in Plants. *Int J Mol Sci* **23**
- 1421 **Provart NJ, Brady SM, Parry G, Schmitz RJ, Queitsch C, Bonetta D, Waese J,**  
1422 **Schneeberger K, Loraine AE** (2021) Anno genominis XX: 20 years of Arabidopsis  
1423 genomics. *Plant Cell* **33**: 832-845
- 1424 **Pullman BS, Wertz J, Carver J, Bandeira N** (2018) ProteinExplorer: A Repository-Scale  
1425 Resource for Exploration of Protein Detection in Public Mass Spectrometry Data Sets. *J*  
1426 *Proteome Res* **17**: 4227-4234
- 1427 **Puthiyaveetil S, McKenzie SD, Kayanja GE, Ibrahim IM** (2021) Transcription initiation as a  
1428 control point in plastid gene expression. *Biochim Biophys Acta Gene Regul Mech* **1864**:  
1429 194689

- 1430 **Rauniyar N, Yates JR, 3rd** (2014) Isobaric labeling-based relative quantification in shotgun  
1431 proteomics. *J Proteome Res* **13**: 5293-5309
- 1432 **Reales-Calderon JA, Sun Z, Mascaraque V, Perez-Navarro E, Vialas V, Deutsch EW,**  
1433 **Moritz RL, Gil C, Martinez JL, Molero G** (2021) A wide-ranging *Pseudomonas*  
1434 *aeruginosa* PeptideAtlas build: A useful proteomic resource for a versatile pathogen. *J*  
1435 *Proteomics* **239**: 104192
- 1436 **Rodriguez E, Chevalier J, Olsen J, Ansbol J, Kapousidou V, Zuo Z, Svenning S, Loeffke C,**  
1437 **Koemeda S, Drozdowskyj PS, Jez J, Durnberger G, Kuenzl F, Schutzbier M,**  
1438 **Mechtler K, Ebstrup EN, Lolle S, Dagdas Y, Petersen M** (2020) Autophagy mediates  
1439 temporary reprogramming and dedifferentiation in plant somatic cells. *EMBO J* **39**:  
1440 e103315
- 1441 **Ross S, Giglione C, Pierre M, Espagne C, Meinel T** (2005) Functional and developmental  
1442 impact of cytosolic protein N-terminal methionine excision in *Arabidopsis*. *Plant Physiol*  
1443 **137**: 623-637
- 1444 **Rowland E, Kim J, Bhuiyan NH, van Wijk KJ** (2015) The *Arabidopsis* Chloroplast Stromal N-  
1445 Terminome: Complexities of Amino-Terminal Protein Maturation and Stability. *Plant*  
1446 *Physiol* **169**: 1881-1896
- 1447 **Rytz TC, Miller MJ, McLoughlin F, Augustine RC, Marshall RS, Juan YT, Charng YY, Scalf**  
1448 **M, Smith LM, Vierstra RD** (2018) SUMOylome Profiling Reveals a Diverse Array of  
1449 Nuclear Targets Modified by the SUMO Ligase SIZ1 during Heat Stress. *Plant Cell* **30**:  
1450 1077-1099
- 1451 **Sanderfoot AA, Kovaleva V, Zheng H, Raikhel NV** (1999) The t-SNARE AtVAM3p resides on  
1452 the prevacuolar compartment in *Arabidopsis* root cells. *Plant Physiol* **121**: 929-938
- 1453 **Schittmayer M, Fritz K, Liesinger L, Griss J, Birner-Gruenberger R** (2016) Cleaning out the  
1454 Litterbox of Proteomic Scientists' Favorite Pet: Optimized Data Analysis Avoiding Trypsin  
1455 Artifacts. *J Proteome Res* **15**: 1222-1229
- 1456 **Sharma V, Eckels J, Schilling B, Ludwig C, Jaffe JD, MacCoss MJ, MacLean B** (2018)  
1457 *Panorama Public*: A Public Repository for Quantitative Data Sets Processed in Skyline.  
1458 *Mol Cell Proteomics* **17**: 1239-1244
- 1459 **Shteynberg D, Deutsch EW, Lam H, Eng JK, Sun Z, Tasman N, Mendoza L, Moritz RL,**  
1460 **Aebersold R, Nesvizhskii AI** (2011) iProphet: multi-level integrative analysis of shotgun  
1461 proteomic data improves peptide and protein identification rates and error estimates. *Mol*  
1462 *Cell Proteomics* **10**: M111 007690



- 1463 **Shteynberg DD, Deutsch EW, Campbell DS, Hoopmann MR, Kusebauch U, Lee D,**  
1464 **Mendoza L, Midha MK, Sun Z, Whetton AD, Moritz RL** (2019) PTMProphet: Fast and  
1465 Accurate Mass Modification Localization for the Trans-Proteomic Pipeline. *J Proteome*  
1466 *Res* **18**: 4262-4272
- 1467 **Silva J, Ferraz R, Dupree P, Showalter AM, Coimbra S** (2020) Three Decades of Advances in  
1468 Arabinogalactan-Protein Biosynthesis. *Front Plant Sci* **11**: 610377
- 1469 **Sloan DB, Wu Z, Sharbrough J** (2018) Correction of Persistent Errors in Arabidopsis  
1470 Reference Mitochondrial Genomes. *Plant Cell* **30**: 525-527
- 1471 **Somerville CR, Ogren WL** (1980) Inhibition of photosynthesis in Arabidopsis mutants lacking  
1472 leaf glutamate synthase activity. *Nature* **286**: 257-259
- 1473 **Somerville CR, Ogren WL** (1982) Mutants of the cruciferous plant Arabidopsis thaliana lacking  
1474 glycine decarboxylase activity. *Biochem J* **202**: 373-380
- 1475 **Stintzi A, Schaller A** (2022) Biogenesis of post-translationally modified peptide signals for plant  
1476 reproductive development. *Curr Opin Plant Biol* **69**: 102274
- 1477 **Sun Q, Zybailov B, Majeran W, Friso G, Olinares PD, van Wijk KJ** (2009) PPDB, the Plant  
1478 Proteomics Database at Cornell. *Nucleic Acids Res* **37**: D969-974
- 1479 **Takahashi F, Hanada K, Kondo T, Shinozaki K** (2019) Hormone-like peptides and small  
1480 coding genes in plant stress signaling and development. *Curr Opin Plant Biol* **51**: 88-95
- 1481 **Tavormina P, De Coninck B, Nikonorova N, De Smet I, Cammue BP** (2015) The Plant  
1482 Peptidome: An Expanding Repertoire of Structural Features and Biological Functions.  
1483 *Plant Cell* **27**: 2095-2118
- 1484 **Tilak P, Kotnik F, Nee G, Seidel J, Sindlinger J, Heinkow P, Eirich J, Schwarzer D,**  
1485 **Finkemeier I** (2023) Proteome-wide lysine acetylation profiling to investigate the  
1486 involvement of histone deacetylase HDA5 in the salt stress response of Arabidopsis  
1487 leaves. *Plant J*
- 1488 **Tost AS, Kristensen A, Olsen LI, Axelsen KB, Fuglsang AT** (2021) The PSY Peptide Family-  
1489 Expression, Modification and Physiological Implications. *Genes (Basel)* **12**
- 1490 **UniProt C** (2020) UniProt: the universal protein knowledgebase in 2021. *Nucleic Acids Res*  
1491 **UniProt C** (2023) UniProt: the Universal Protein Knowledgebase in 2023. *Nucleic Acids Res* **51**:  
1492 D523-D531
- 1493 **van Dongen JT, Licausi F** (2015) Oxygen sensing and signaling. *Annu Rev Plant Biol* **66**: 345-  
1494 367

- 1495 **van Wijk KJ, Friso G, Walther D, Schulze WX** (2014) Meta-Analysis of Arabidopsis thaliana  
1496 Phospho-Proteomics Data Reveals Compartmentalization of Phosphorylation Motifs.  
1497 *Plant Cell* **26**: 2367-2389
- 1498 **van Wijk KJ, Leppert T, Sun Q, Boguraev SS, Sun Z, Mendoza L, Deutsch EW** (2021) The  
1499 Arabidopsis PeptideAtlas: Harnessing worldwide proteomics data to create a  
1500 comprehensive community proteomics resource. *Plant Cell* **33**: 3421-3453
- 1501 **Verrastro I, Pasha S, Jensen KT, Pitt AR, Spickett CM** (2015) Mass spectrometry-based  
1502 methods for identifying oxidized proteins in disease: advances and challenges.  
1503 *Biomolecules* **5**: 378-411
- 1504 **Walton A, Stes E, Cybulski N, Van Bel M, Inigo S, Durand AN, Timmerman E, Heyman J,**  
1505 **Pauwels L, De Veylder L, Goossens A, De Smet I, Coppens F, Goormachtig S,**  
1506 **Gevaert K** (2016) It's Time for Some "Site"-Seeing: Novel Tools to Monitor the Ubiquitin  
1507 Landscape in Arabidopsis thaliana. *Plant Cell* **28**: 6-16
- 1508 **Waltz F, Nguyen TT, Arrive M, Bochler A, Chicher J, Hammann P, Kuhn L, Quadrado M,**  
1509 **Mireau H, Hashem Y, Giege P** (2019) Small is big in Arabidopsis mitochondrial  
1510 ribosome. *Nat Plants* **5**: 106-117
- 1511 **Weits DA, van Dongen JT, Licausi F** (2021) Molecular oxygen as a signaling component in  
1512 plant development. *New Phytol* **229**: 24-35
- 1513 **White MD, Klecker M, Hopkinson RJ, Weits DA, Mueller C, Naumann C, O'Neill R, Wickens**  
1514 **J, Yang J, Brooks-Bartlett JC, Garman EF, Grossmann TN, Dissmeyer N, Flashman**  
1515 **E** (2017) Plant cysteine oxidases are dioxygenases that directly enable arginyl  
1516 transferase-catalysed arginylation of N-end rule targets. *Nat Commun* **8**: 14690
- 1517 **Willems P** (2022) Exploring Posttranslational Modifications with the Plant PTM Viewer. *Methods*  
1518 *Mol Biol* **2447**: 285-296
- 1519 **Willems P, Ndah E, Jonckheere V, Van Breusegem F, Van Damme P** (2021) To New  
1520 Beginnings: Riboproteogenomics Discovery of N-Terminal Proteoforms in Arabidopsis  
1521 Thaliana. *Front Plant Sci* **12**: 778804
- 1522 **Willoughby AC, Nimchuk ZL** (2021) WOX going on: CLE peptides in plant development. *Curr*  
1523 *Opin Plant Biol* **63**: 102056
- 1524 **Wu GZ, Bock R** (2021) GUN control in retrograde signaling: How GENOMES UNCOUPLED  
1525 proteins adjust nuclear gene expression to plastid biogenesis. *Plant Cell* **33**: 457-474
- 1526 **Yuan B, Wang H** (2021) Peptide Signaling Pathways Regulate Plant Vascular Development.  
1527 *Front Plant Sci* **12**: 719606

- 1528 **Zhang M, Tan FQ, Fan YJ, Wang TT, Song X, Xie KD, Wu XM, Zhang F, Deng XX, Grosser**  
1529 **JW, Guo WW** (2022) Acetylome reprogramming participates in the establishment of fruit  
1530 metabolism during polyploidization in citrus. *Plant Physiol* **190**: 2519-2538
- 1531 **Zhong S, Liu M, Wang Z, Huang Q, Hou S, Xu YC, Ge Z, Song Z, Huang J, Qiu X, Shi Y,**  
1532 **Xiao J, Liu P, Guo YL, Dong J, Dresselhaus T, Gu H, Qu LJ** (2019) Cysteine-rich  
1533 peptides promote interspecific genetic isolation in Arabidopsis. *Science* **364**
- 1534 **Zybailov B, Sun Q, van Wijk KJ** (2009) Workflow for large scale detection and validation of  
1535 peptide modifications by RPLC-LTQ-Orbitrap: application to the Arabidopsis thaliana leaf  
1536 proteome and an online modified peptide library. *Anal Chem* **81**: 8015-8024
- 1537

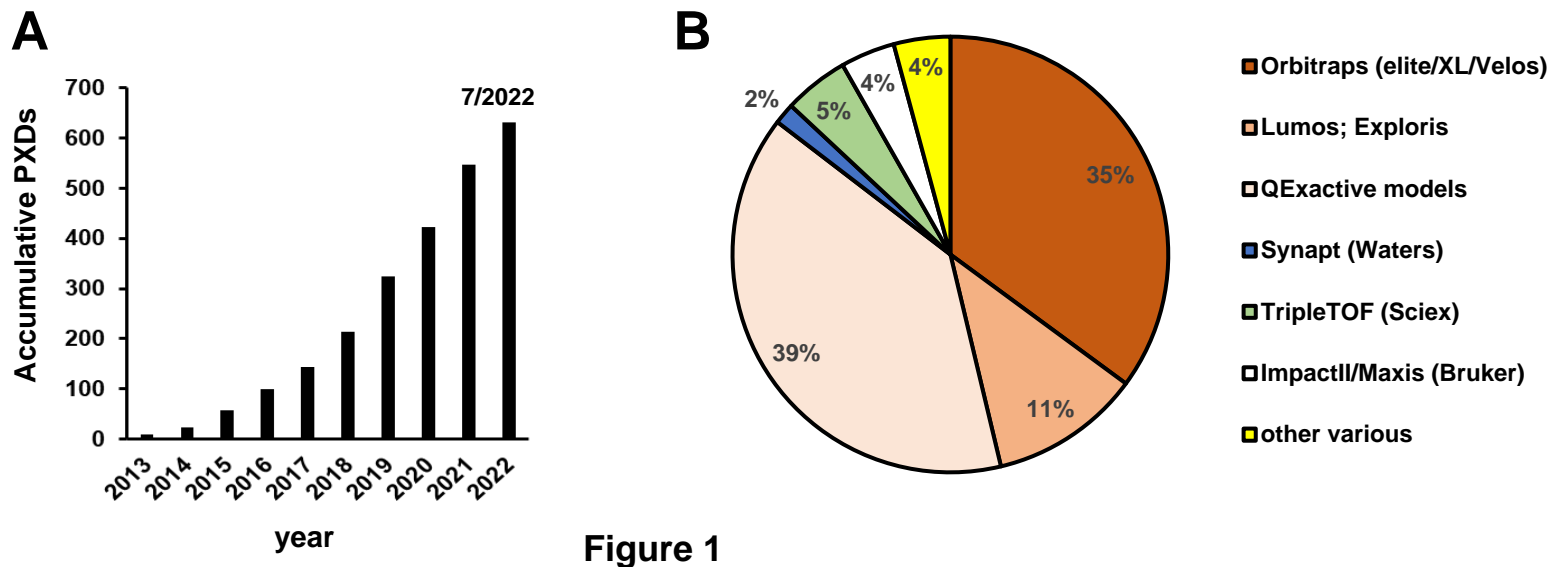

**Figure 1**

**Figure 1** Publicly available PXDs and mass spectrometry instrumentation for *Arabidopsis thaliana* in ProteomeXchange. A, Cumulative PXD available. B, Mass spectrometry instruments used to acquire data in these PXDs ('other' includes low resolution instruments such as LCQs, LTQs, QStar, as well as MALDI-TOF-TOF).

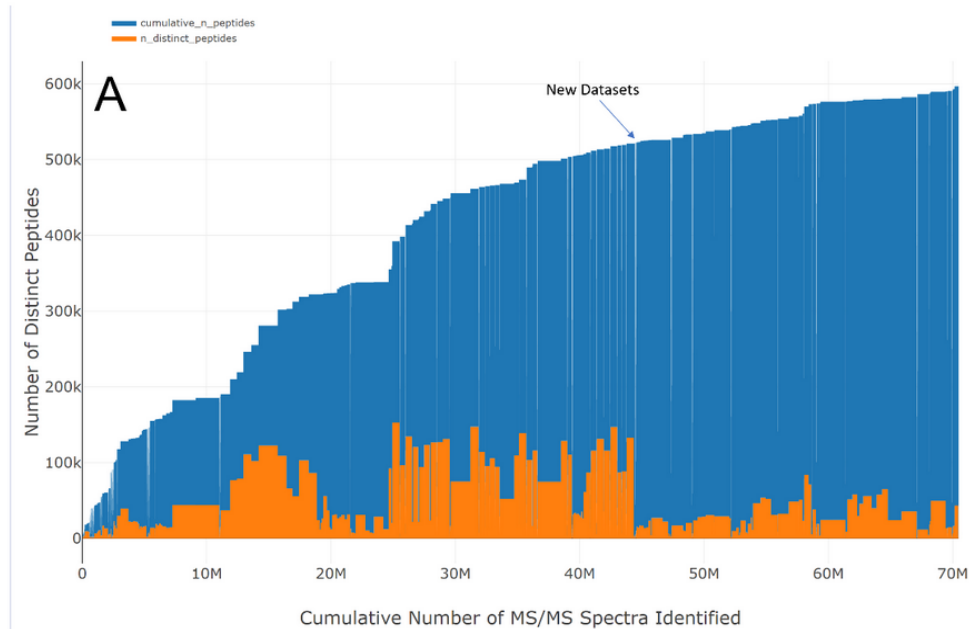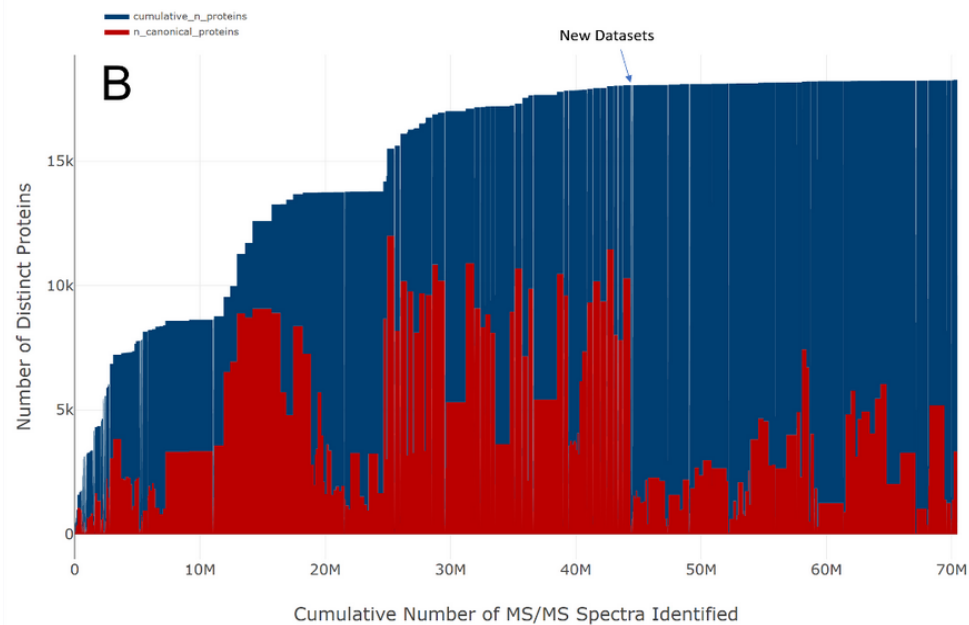

**Figure 2** Contributions of individual experiments to the PeptideAtlas Build. A, From the 369 experiments conducted, the graph displays the total number of distinct peptides for the build as well as the number of peptides contributed by each experiment. B, The plot shows the cumulative number of distinct proteins and the number of proteins that were contributed from each experiment. The location where new datasets added since the first build is marked.

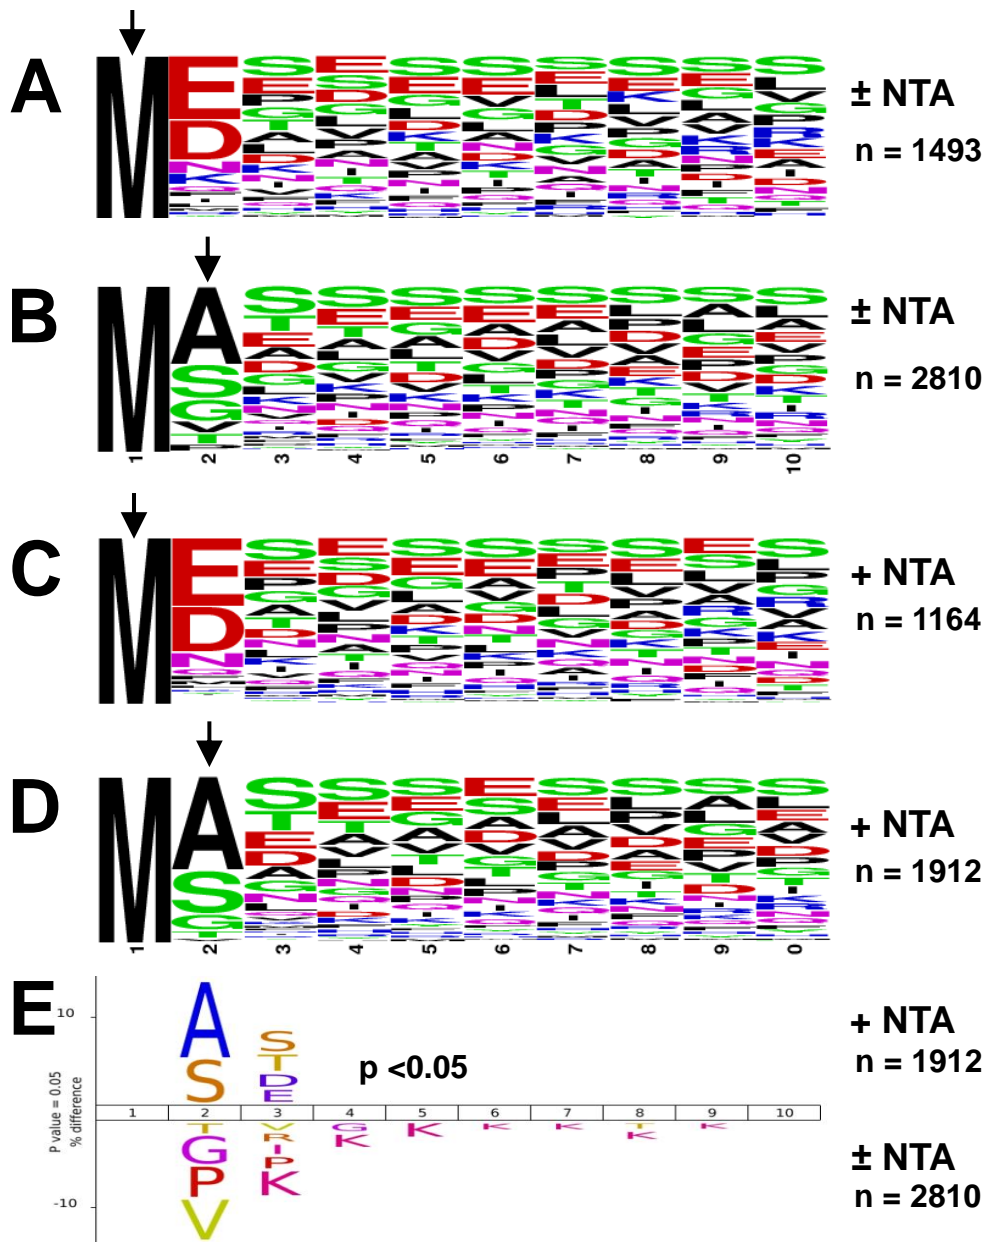

**Figure 3** N-terminal consensus sequence patterns of canonical nuclear-encoded proteins accumulating with the initiating methionine or the 2<sup>nd</sup> residue (after methionine excision) with or without NTA. A,B, Sequence logos of proteins (first 10 residues are shown) that are exclusively found with the initiating methionine (A) or exclusively found with just this methionine removed (B), irrespective of NTA. C,D, Sequence logos of NTA proteins (first 10 residues are shown) exclusively accumulating with the initiating methionine (C) or exclusively found with the second residue (methionine removed). E. Icelogo for NTA canonical proteins exclusively starting at position 2 using all canonical protein starting exclusively at position 2, but irrespective of the NTA status. Arrows indicate the observed N-terminal residue.

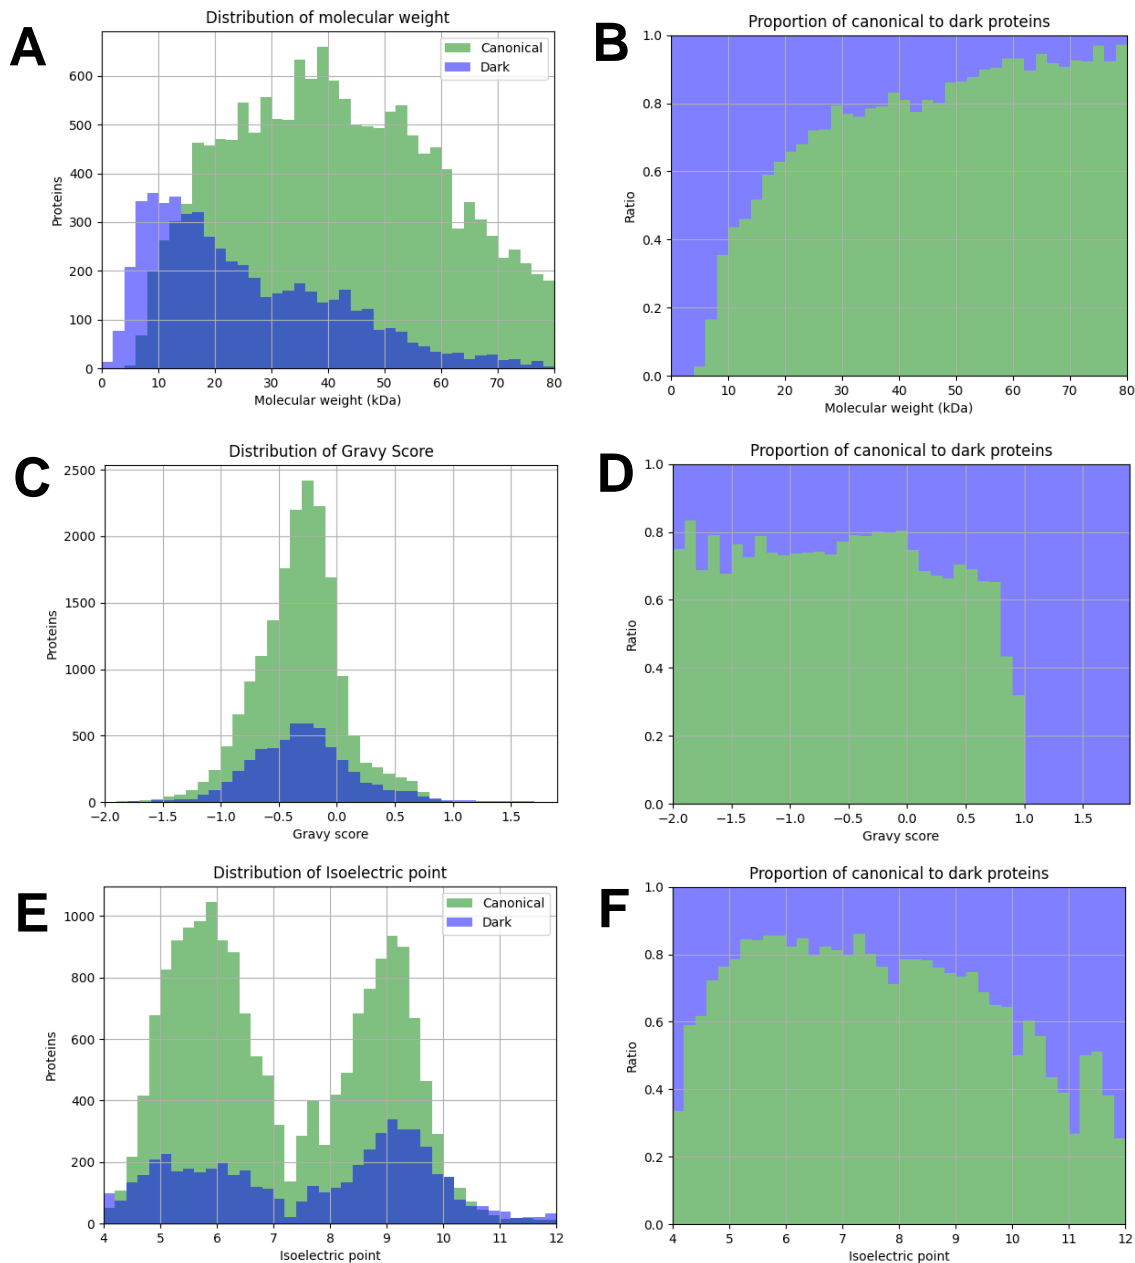

**Figure 4** Distributions of physical-chemical properties of the 18079 canonical (green) and 5595 dark (purple) proteins. A,C,E, Absolute counts of proteins within each bin for canonical and dark proteins. B,D,F, The proportion of canonical and dark proteins within each bin. A,B. Distributions and proportions of the molecular weight (kDa) of canonical (green) and dark (purple) proteins. Proteins with molecular weights between 0 and 80 kDa are shown. C,D. Distributions and proportions of the hydrophobicity (gravy score) of canonical (green) and dark (purple) proteins. Proteins with gravy score between -2.0 (hydrophilic) and 2.0 (very hydrophobic) are shown. E,F. Distributions and proportions of the isoelectric point (pI) of canonical (green) and dark (purple) proteins. Proteins with pI between 4.0 (acidic) and 12 (very basic) are shown.

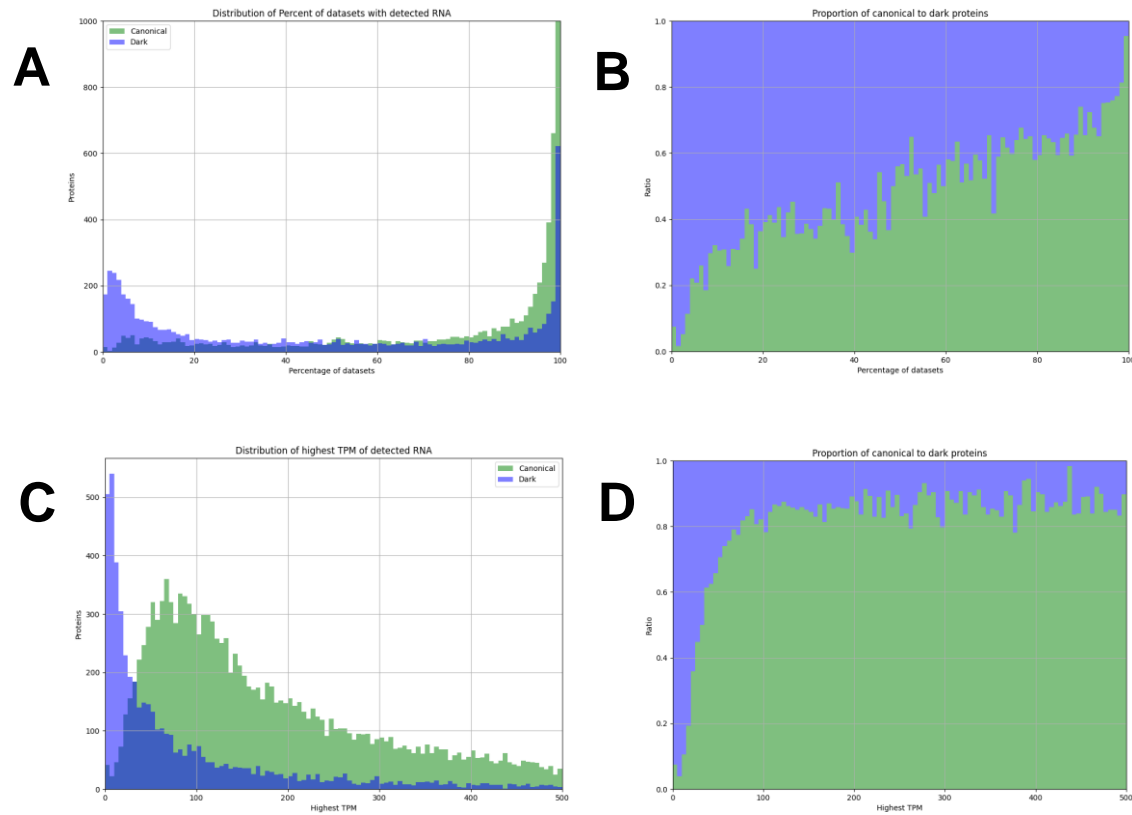

**Figure 5** Transcript abundance and observation frequency of 26975 nuclear-encoded protein coding genes in 5673 high quality RNA-seq datasets. A,B, Distributions of the percentage of RNA-seq datasets with detected transcripts associated with the canonical (green) and dark (purple) proteins. A, Absolute counts of proteins within each bin and B, proportion of light and dark proteins within each bin. C,D, Distributions of the maximum transcripts per million (TPM) among all RNA-seq experiments for the detected transcripts associated with the canonical (green) and dark (purple) proteins. Absolute counts of proteins within each bin (C) and the proportion of light and dark proteins within each bin (D). The number of TPM extends as high as 207,000 for seed storage protein albumin 3 (AT4G27160), followed by seed storage cruciferin 1 and 3 (AT5G44120 and AT4G28520), Rubisco small subunit 1A (AT1G67090) and the hypothetical very small (33 aa) protein AT2G01021. |



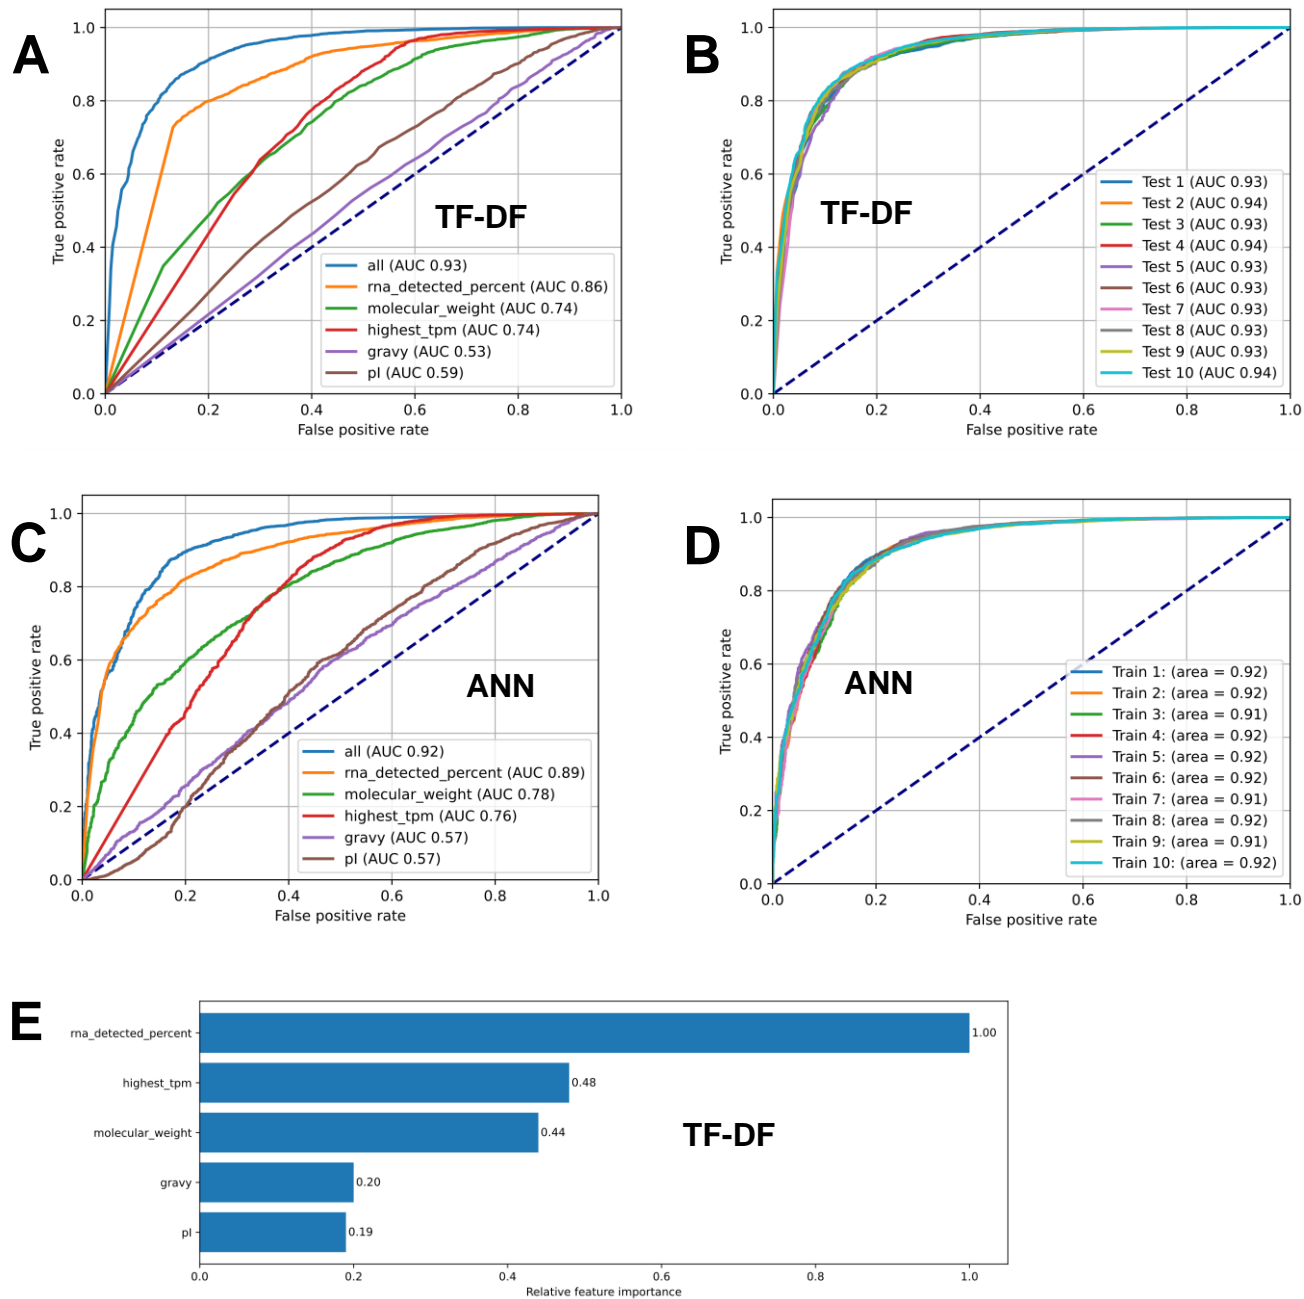

**Figure 6** Machine learning models (ANN and TF-DF) to predict the probability of Arabidopsis proteins to be detected at the canonical levels in build 2. A-D, ROC curves for TF-DN models (A,B) or ANN (C,D) models trained on protein physicochemical properties and RNA expression data. A higher percentage of area under the curve (AUC) signifies better accuracy whereas an AUC of 0.5 (denoted by the dotted navy line) signifies near random prediction. As shown, % RNA detected, molecular\_weight, and highest TPM enhance the performance of an ANN model, whereas pi and gravy barely impact it. B,D, ROC curves of TF-DF (B) and ANN (D) models trained on 10 randomized subsets of the same size from the input data. The accuracy of the TF-DF and ANN models are consistently around 93% and 92%, respectively.

E, Feature importance by SUM\_SCORE. The TF-DF model has several built-in methods that calculate the significance of features to a model's performance. As shown, this model uses SUM\_SCORE.

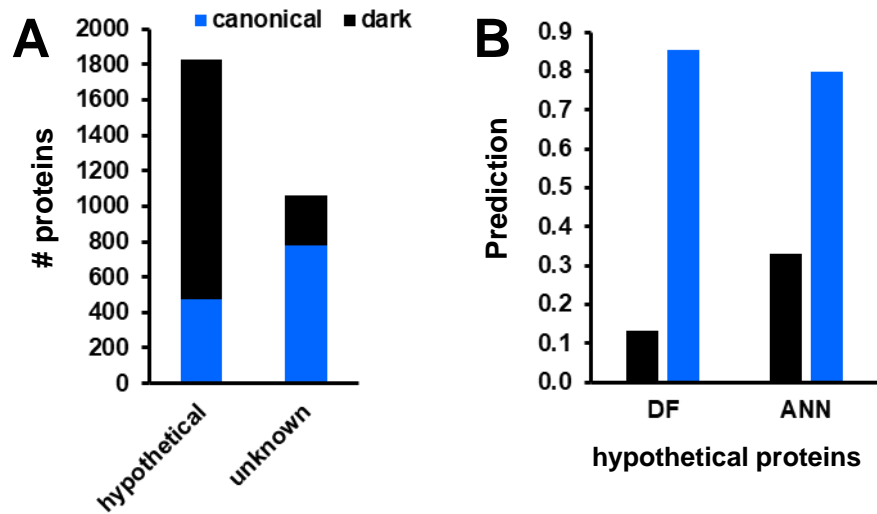

**Figure 7** Hypothetical and unknown/DUF proteins in the dark and canonical proteome and their predictions to be canonical. All canonical and unobserved proteins were scored for the presence of the words “hypothetical”, “unknown” or “Domain of Unknown Function (DUF)” in their description from Araport11/TAIR. A, Hypothetical and unknown proteins in the dark and canonical proteome. B, Predicted observability for the hypothetical proteins to be canonical using the two machine learning models (DF and ANN).

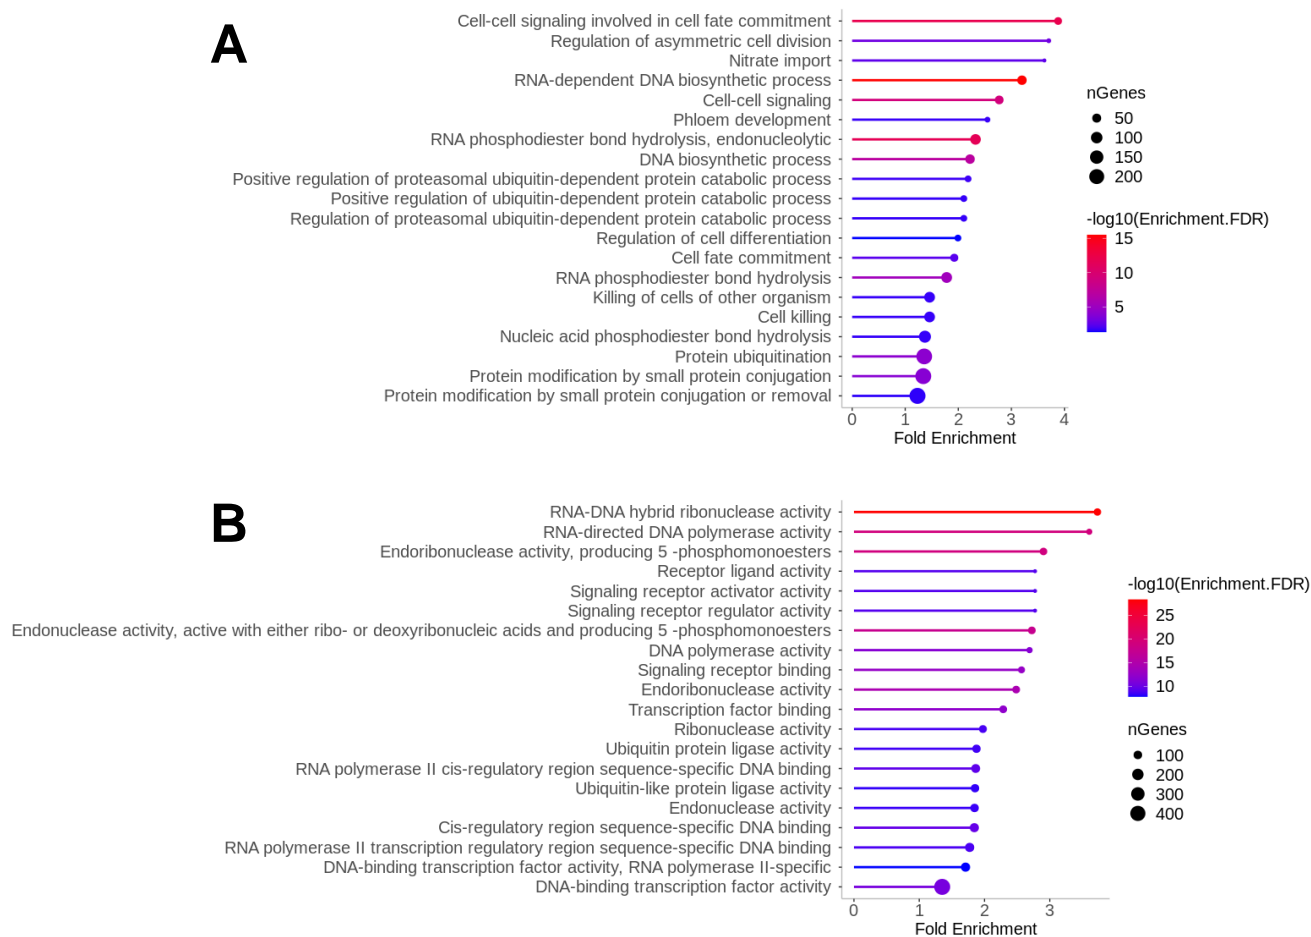

**Figure 8** GO enrichment of the 5595 dark proteins compare to all predicted Arabidopsis proteins for Biological Process and Molecular function. A,B, The 20 most significant GO terms (lowest FDR) are shown, ordered by fold enrichment for biological process (A) and molecular function (B)

**A**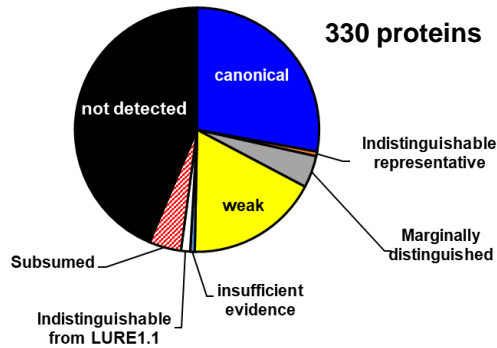**B**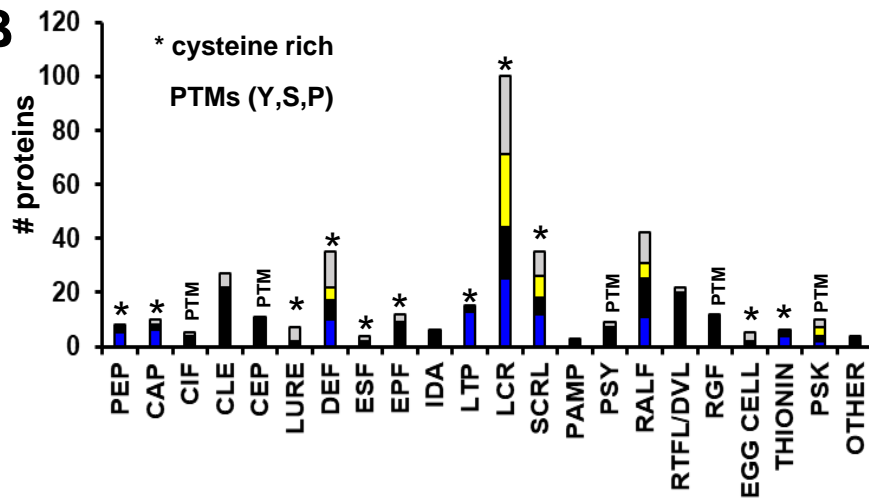**C**

| Family   | canonical % | dark % | weak % | other % | precursor length (aa) | median precursor length |
|----------|-------------|--------|--------|---------|-----------------------|-------------------------|
| PEP      | 63%         | 38%    | 0%     | 0%      | 81-109                | 89                      |
| CAP      | 67%         | 11%    | 11%    | 22%     | 160-210               | 166                     |
| CIF      | 0%          | 75%    | 25%    | 25%     | 76-102                | 83                      |
| CLE      | 0%          | 81%    | 4%     | 19%     | 74-121                | 97                      |
| CEP      | 0%          | 90%    | 10%    | 10%     | 82-229                | 103                     |
| LURE     | 0%          | 29%    | 0%     | 71%     | 90-94                 | 91                      |
| DEF      | 33%         | 23%    | 17%    | 43%     | 60-129                | 76                      |
| ESF      | 0%          | 33%    | 33%    | 67%     | 82-90                 | 83                      |
| EPF      | 9%          | 64%    | 9%     | 27%     | 99-230                | 120                     |
| IDA      | 0%          | 83%    | 0%     | 17%     | 77-102                | 94                      |
| LTP      | 87%         | 13%    | 0%     | 0%      | 112-126               | 118                     |
| LCR      | 34%         | 26%    | 37%    | 40%     | 70-127                | 79                      |
| SCRL     | 44%         | 22%    | 30%    | 33%     | 86-109                | 93                      |
| PAMP     | 0%          | 100%   | 0%     | 0%      | 72-86                 | 84                      |
| PSY      | 0%          | 75%    | 13%    | 25%     | 71-94                 | 82                      |
| RALF     | 31%         | 39%    | 17%    | 31%     | 72-138                | 90                      |
| RTFL/DVL | 5%          | 86%    | 5%     | 10%     | 40-144                | 53                      |
| RGF      | 0%          | 92%    | 0%     | 8%      | 79-163                | 110                     |
| EGG CELL | 20%         | 20%    | 0%     | 60%     | 125-158               | 127                     |
| THIONIN  | 67%         | 33%    | 0%     | 0%      | 115-134               | 134                     |
| PSK      | 29%         | 29%    | 43%    | 43%     | 77-109                | 87                      |
| OTHER    | 33%         | 33%    | 33%    | 33%     | 36-81                 | 81                      |

**Figure 9** Identification status of members of different signaling peptide families in build 2. A, Overall identification status across 8 confidence tiers of the 330 signaling peptide producing proteins (Supplemental Data Set S11). The tiers system is described in more detail in (van Wijk et al., 2021). Identified protein with status 'weak' have at least one uniquely mapping peptide of 9 amino acid residues but does not meet the criteria for canonical (at least 2 uniquely mapping non-nested peptides of at least 9 residues with at least 18 residues of total coverage). B, Bar diagrams of proteins within each of the peptide signaling families. Color coding within each bar indicates the number of proteins not-observed (black), weak (yellow), canonical (blue) or in other tiers (grey). \* indicates cysteine rich peptides. PTMs indicates known presence of PTMs of signaling peptides. C, Listing all families, identification level, precursor length (range and median), size mature bioactive peptides.

**A**

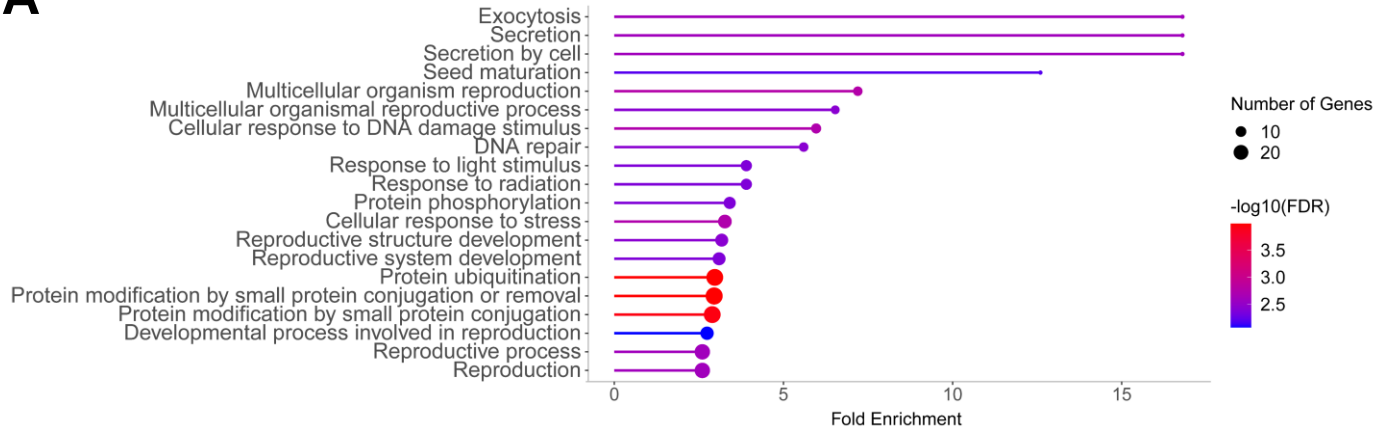

**B**

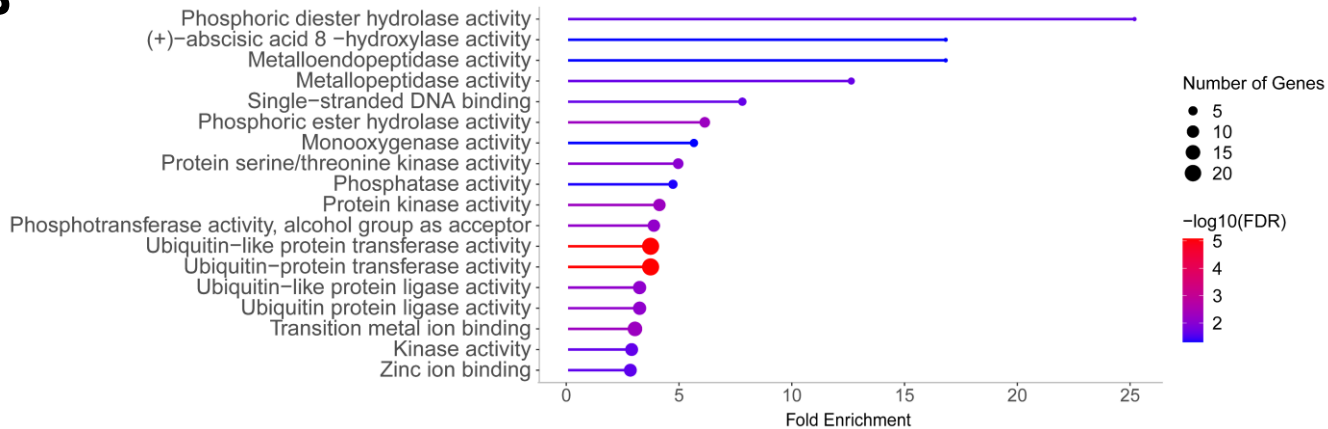

**Figure 10** GO enrichment of 222 outlier dark proteins compare to all 5595 dark proteins or Biological Process and Molecular function. The outliers are defined as dark proteins having a predicted probability to be canonical of >0.8 by both machine learning models. A,B, The 20 most significant GO terms (lowest FDR) are shown, ordered by fold enrichment for biological process (A) and molecular function (B).

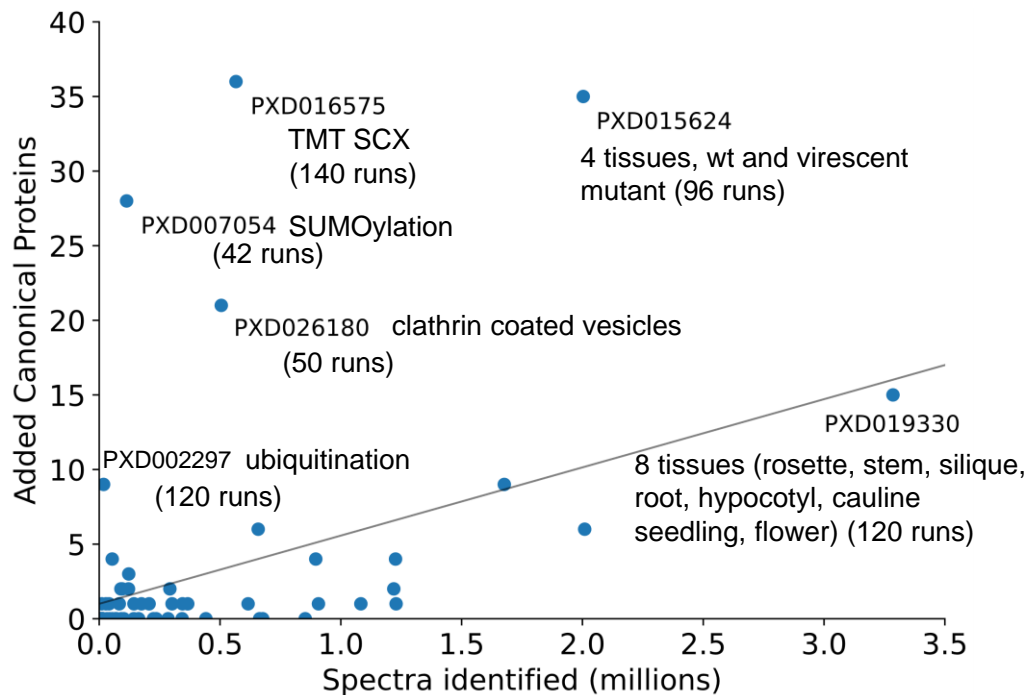

**Figure 11** The relation between the number of identified spectra and newly identified canonical proteins for each of the 63 new PXDs that we added for build 2. Key information of the sample type is shown. Newly identified canonical proteins are proteins that were not yet identified as canonicals in build 1 or PXDs in build 2 with lower number. MS instruments used are: PXD016575 – Q Exactive HF-X; PXD007054 - LTQ Orbitrap Velos; PXD026180 - LTQ, Q Exactive HF, Q Exactive and LTQ FT Ultra; PXD015624 – Q Exactive, PXD0119330 - Orbitrap Velos Pro; PXD0002297 – Q Exactive.

## Parsed Citations

- Abbas M, Sharma G, Dambire C, Marquez J, Alonso-Blanco C, Proano K, Holdsworth MJ (2022) An oxygen-sensing mechanism for angiosperm adaptation to altitude. *Nature* 606: 565-569  
Google Scholar: [Author Only](#) [Title Only](#) [Author and Title](#)
- Alex Mason G, Canto-Pastor A, Brady SM, Provart NJ (2021) Bioinformatic Tools in Arabidopsis Research. *Methods Mol Biol* 2200: 25-89  
Google Scholar: [Author Only](#) [Title Only](#) [Author and Title](#)
- Ashburner M, Ball CA, Blake JA, Botstein D, Butler H, Cherry JM, Davis AP, Dolinski K, Dwight SS, Eppig JT, Harris MA, Hill DP, Issel-Tarver L, Kasarskis A, Lewis S, Matese JC, Richardson JE, Ringwald M, Rubin GM, Sherlock G (2000) Gene ontology: tool for the unification of biology. The Gene Ontology Consortium. *Nat Genet* 25: 25-29  
Google Scholar: [Author Only](#) [Title Only](#) [Author and Title](#)
- Balparda M, Elsasser M, Badia MB, Giese J, Bovdilova A, Hudig M, Reinmuth L, Eirich J, Schwarzlander M, Finkemeier I, Schallenberg-Rudinger M, Maurino VG (2022) Acetylation of conserved lysines fine-tunes mitochondrial malate dehydrogenase activity in land plants. *Plant J* 109: 92-111  
Google Scholar: [Author Only](#) [Title Only](#) [Author and Title](#)
- Barreto P, Dambire C, Sharma G, Vicente J, Osborne R, Yassitepe J, Gibbs DJ, Maia IG, Holdsworth MJ, Arruda P (2022) Mitochondrial retrograde signaling through UCP1-mediated inhibition of the plant oxygen-sensing pathway. *Curr Biol* 32: 1403-1411 e1404  
Google Scholar: [Author Only](#) [Title Only](#) [Author and Title](#)
- Bartels S, Lori M, Mbengue M, van Verk M, Klauser D, Hander T, Boni R, Robatzek S, Boller T (2013) The family of Peps and their precursors in Arabidopsis: differential expression and localization but similar induction of pattern-triggered immune responses. *J Exp Bot* 64: 5309-5321  
Google Scholar: [Author Only](#) [Title Only](#) [Author and Title](#)
- Bassal M, Abukhalaf M, Majovsky P, Thieme D, Herr T, Ayash M, Tabassum N, Al Shweiki MR, Proksch C, Hmedat A, Ziegler J, Lee J, Neumann S, Hoehenwarter W (2020) Reshaping of the Arabidopsis thaliana Proteome Landscape and Co-regulation of Proteins in Development and Immunity. *Mol Plant* 13: 1709-1732  
Google Scholar: [Author Only](#) [Title Only](#) [Author and Title](#)
- Berger N, Vignols F, Przybyla-Toscano J, Roland M, Rofidal V, Touraine B, Zienkiewicz K, Couturier J, Feussner I, Santoni V, Rouhier N, Gaymard F, Dubos C (2020) Identification of client iron-sulfur proteins of the chloroplastic NFU2 transfer protein in Arabidopsis thaliana. *J Exp Bot* 71: 4171-4187  
Google Scholar: [Author Only](#) [Title Only](#) [Author and Title](#)
- Bienvenut WW, Brunje A, Boyer JB, Muhlenbeck JS, Bernal G, Lassowskat I, Dian C, Linster E, Dinh TV, Koskela MM, Jung V, Seidel J, Schyrba LK, Ivanauskaite A, Eirich J, Hell R, Schwarzer D, Mulo P, Wirtz M, Meinel T, Giglione C, Finkemeier I (2020) Dual lysine and N-terminal acetyltransferases reveal the complexity underpinning protein acetylation. *Mol Syst Biol* 16: e9464  
Google Scholar: [Author Only](#) [Title Only](#) [Author and Title](#)
- Birnbaum KD, Otegui MS, Bailey-Serres J, Rhee SY (2022) The Plant Cell Atlas: focusing new technologies on the kingdom that nourishes the planet. *Plant Physiol* 188: 675-679  
Google Scholar: [Author Only](#) [Title Only](#) [Author and Title](#)
- Chambers MC, Maclean B, Burke R, Amodei D, Ruderman DL, Neumann S, Gatto L, Fischer B, Pratt B, Egertson J, Hoff K, Kessner D, Tasman N, Shulman N, Frewen B, Baker TA, Brusniak MY, Paulse C, Creasy D, Flashner L, Kani K, Moulding C, Seymour SL, Nuwaysir LM, Lefebvre B, Kuhlmann F, Roark J, Rainer P, Detlev S, Hemenway T, Huhmer A, Langridge J, Connolly B, Chadick T, Holly K, Eckels J, Deutsch EW, Moritz RL, Katz JE, Agus DB, MacCoss M, Tabb DL, Mallick P (2012) A cross-platform toolkit for mass spectrometry and proteomics. *Nat Biotechnol* 30: 918-920  
Google Scholar: [Author Only](#) [Title Only](#) [Author and Title](#)
- Chen X, Sun Y, Zhang T, Shu L, Roepstorff P, Yang F (2021) Quantitative Proteomics Using Isobaric Labeling: A Practical Guide. *Genomics Proteomics Bioinformatics* 19: 689-706  
Google Scholar: [Author Only](#) [Title Only](#) [Author and Title](#)
- Cheng CY, Krishnakumar V, Chan AP, Thibaud-Nissen F, Schobel S, Town CD (2017) Araport11: a complete reannotation of the Arabidopsis thaliana reference genome. *Plant J* 89: 789-804  
Google Scholar: [Author Only](#) [Title Only](#) [Author and Title](#)
- Chi W, He B, Mao J, Jiang J, Zhang L (2015) Plastid sigma factors: Their individual functions and regulation in transcription. *Biochim Biophys Acta* 1847: 770-778  
Google Scholar: [Author Only](#) [Title Only](#) [Author and Title](#)
- Dahhan DA, Reynolds GD, Cardenas JJ, Eeckhout D, Johnson A, Yperman K, Kaufmann WA, Vang N, Yan X, Hwang I, Heese A, De Jaeger G, Friml J, Van Damme D, Pan J, Bednarek SY (2022) Proteomic characterization of isolated Arabidopsis clathrin-coated

**vesicles reveals evolutionarily conserved and plant-specific components.** *Plant Cell* 34: 2150-2173

Google Scholar: [Author Only](#) [Title Only](#) [Author and Title](#)

**Deutsch EW, Bandeira N, Perez-Riverol Y, Sharma V, Carver JJ, Mendoza L, Kundu DJ, Wang S, Bandla C, Kamatchinathan S, Hewapathirana S, Pullman BS, Wertz J, Sun Z, Kawano S, Okuda S, Watanabe Y, MacLean B, MacCoss MJ, Zhu Y, Ishihama Y, Vizcaino JA (2023) The ProteomeXchange consortium at 10 years: 2023 update.** *Nucleic Acids Res* 51: D1539-D1548

Google Scholar: [Author Only](#) [Title Only](#) [Author and Title](#)

**Deutsch EW, Mendoza L, Shteynberg D, Slagel J, Sun Z, Moritz RL (2015) Trans-Proteomic Pipeline, a standardized data processing pipeline for large-scale reproducible proteomics informatics.** *Proteomics Clin Appl* 9: 745-754

Google Scholar: [Author Only](#) [Title Only](#) [Author and Title](#)

**Deutsch EW, Mendoza L, Shteynberg DD, Hoopmann MR, Sun Z, Eng JK, Moritz RL (2023) Trans-Proteomic Pipeline: Robust Mass Spectrometry-Based Proteomics Data Analysis Suite.** *J Proteome Res* doi: 10.1021/acs.jproteome.2c00748. Online ahead of print.

Google Scholar: [Author Only](#) [Title Only](#) [Author and Title](#)

**Deutsch EW, Overall CM, Van Eyk JE, Baker MS, Paik YK, Weintraub ST, Lane L, Martens L, Vandenbrouck Y, Kusebauch U, Hancock WS, Hermjakob H, Aebersold R, Moritz RL, Omenn GS (2016) Human Proteome Project Mass Spectrometry Data Interpretation Guidelines 2.1.** *J Proteome Res* 15: 3961-3970

Google Scholar: [Author Only](#) [Title Only](#) [Author and Title](#)

**Dinh TV, Bienvenut WW, Linster E, Feldman-Salit A, Jung VA, Meinel T, Hell R, Giglione C, Wirtz M (2015) Molecular identification and functional characterization of the first Nalpha-acetyltransferase in plastids by global acetylome profiling.** *Proteomics* 15: 2426-2435

Google Scholar: [Author Only](#) [Title Only](#) [Author and Title](#)

**Eng JK, Deutsch EW (2020) Extending Comet for Global Amino Acid Variant and Post-Translational Modification Analysis Using the PSI Extended FASTA Format.** *Proteomics* 20: e1900362

Google Scholar: [Author Only](#) [Title Only](#) [Author and Title](#)

**Frankenfield AM, Ni J, Ahmed M, Hao L (2022) Protein Contaminants Matter: Building Universal Protein Contaminant Libraries for DDA and DIA Proteomics.** *J Proteome Res* 21: 2104-2113

Google Scholar: [Author Only](#) [Title Only](#) [Author and Title](#)

**Fujita S (2021) CASPARIAN STRIP INTEGRITY FACTOR (CIF) family peptides - regulator of plant extracellular barriers.** *Peptides* 143: 170599

Google Scholar: [Author Only](#) [Title Only](#) [Author and Title](#)

**Fussl M, Konig AC, Eirich J, Hartl M, Kleinknecht L, Bohne AV, Harzen A, Kramer K, Leister D, Nickelsen J, Finkemeier I (2022) Dynamic light- and acetate-dependent regulation of the proteome and lysine acetylome of *Chlamydomonas*.** *Plant J* 109: 261-277

Google Scholar: [Author Only](#) [Title Only](#) [Author and Title](#)

**Ge SX, Jung D, Yao R (2020) ShinyGO: a graphical gene-set enrichment tool for animals and plants.** *Bioinformatics* 36: 2628-2629

Google Scholar: [Author Only](#) [Title Only](#) [Author and Title](#)

**Gene Ontology C (2021) The Gene Ontology resource: enriching a GOld mine.** *Nucleic Acids Res* 49: D325-D334

Google Scholar: [Author Only](#) [Title Only](#) [Author and Title](#)

**Gevaert K, Goethals M, Martens L, Van Damme J, Staes A, Thomas GR, Vandekerckhove J (2003) Exploring proteomes and analyzing protein processing by mass spectrometric identification of sorted N-terminal peptides.** *Nat Biotechnol* 21: 566-569

Google Scholar: [Author Only](#) [Title Only](#) [Author and Title](#)

**Gibbs DJ, Conde JV, Berckhan S, Prasad G, Mendiondo GM, Holdsworth MJ (2015) Group VII Ethylene Response Factors Coordinate Oxygen and Nitric Oxide Signal Transduction and Stress Responses in Plants.** *Plant Physiol* 169: 23-31

Google Scholar: [Author Only](#) [Title Only](#) [Author and Title](#)

**Giglione C, Boularot A, Meinel T (2004) Protein N-terminal methionine excision.** *Cell Mol Life Sci* 61: 1455-1474

Google Scholar: [Author Only](#) [Title Only](#) [Author and Title](#)

**Grubb LE, Derbyshire P, Dunning KE, Zipfel C, Menke FLH, Monaghan J (2021) Large-scale identification of ubiquitination sites on membrane-associated proteins in *Arabidopsis thaliana* seedlings.** *Plant Physiol* 185: 1483-1488

Google Scholar: [Author Only](#) [Title Only](#) [Author and Title](#)

**Gunaratne J, Schmidt A, Quandt A, Neo SP, Sarac OS, Gracia T, Loguercio S, Ahrne E, Xia RL, Tan KH, Lossner C, Bahler J, Beyer A, Blackstock W, Aebersold R (2013) Extensive mass spectrometry-based analysis of the fission yeast proteome: the *Schizosaccharomyces pombe* PeptideAtlas.** *Mol Cell Proteomics* 12: 1741-1751

Google Scholar: [Author Only](#) [Title Only](#) [Author and Title](#)

**Guo Y, Xiong L, Ishitani M, Zhu JK (2002) An *Arabidopsis* mutation in translation elongation factor 2 causes superinduction of**



**CBF/DREB1 transcription factor genes but blocks the induction of their downstream targets under low temperatures. Proc Natl Acad Sci U S A 99: 7786-7791**

Google Scholar: [Author Only](#) [Title Only](#) [Author and Title](#)

**Hains PG, Robinson PJ (2017) The Impact of Commonly Used Alkylating Agents on Artifactual Peptide Modification. J Proteome Res 16: 3443-3447**

Google Scholar: [Author Only](#) [Title Only](#) [Author and Title](#)

**Hammarlund EU, Flashman E, Mohlin S, Licausi F (2020) Oxygen-sensing mechanisms across eukaryotic kingdoms and their roles in complex multicellularity. Science 370**

Google Scholar: [Author Only](#) [Title Only](#) [Author and Title](#)

**Hawkins CL, Davies MJ (2019) Detection, identification, and quantification of oxidative protein modifications. J Biol Chem 294: 19683-19708**

Google Scholar: [Author Only](#) [Title Only](#) [Author and Title](#)

**Hazarika RR, De Coninck B, Yamamoto LR, Martin LR, Cammue BP, van Noort V (2017) ARA-PEPs: a repository of putative sORF-encoded peptides in Arabidopsis thaliana. BMC Bioinformatics 18: 37**

Google Scholar: [Author Only](#) [Title Only](#) [Author and Title](#)

**Hesselager MO, Codrea MC, Sun Z, Deutsch EW, Bennike TB, Stensballe A, Bundgaard L, Moritz RL, Bendixen E (2016) The Pig PeptideAtlas: A resource for systems biology in animal production and biomedicine. Proteomics 16: 634-644**

Google Scholar: [Author Only](#) [Title Only](#) [Author and Title](#)

**Hodge K, Have ST, Hutton L, Lamond AI (2013) Cleaning up the masses: exclusion lists to reduce contamination with HPLC-MS/MS. J Proteomics 88: 92-103**

Google Scholar: [Author Only](#) [Title Only](#) [Author and Title](#)

**Hooper CM, Castleden IR, Tanz SK, Aryamanesh N, Millar AH (2017) SUBA4: the interactive data analysis centre for Arabidopsis subcellular protein locations. Nucleic Acids Res 45: D1064-D1074**

Google Scholar: [Author Only](#) [Title Only](#) [Author and Title](#)

**Hsu JL, Huang SY, Chow NH, Chen SH (2003) Stable-isotope dimethyl labeling for quantitative proteomics. Anal Chem 75: 6843-6852**

Google Scholar: [Author Only](#) [Title Only](#) [Author and Title](#)

**Hu XL, Lu H, Hassan MM, Zhang J, Yuan G, Abraham PE, Shrestha HK, Villalobos Solis MI, Chen JG, Tschaplinski TJ, Doktycz MJ, Tuskan GA, Cheng ZM, Yang X (2021) Advances and perspectives in discovery and functional analysis of small secreted proteins in plants. Hortic Res 8: 130**

Google Scholar: [Author Only](#) [Title Only](#) [Author and Title](#)

**Huang A, Tang Y, Shi X, Jia M, Zhu J, Yan X, Chen H, Gu Y (2020) Proximity labeling proteomics reveals critical regulators for inner nuclear membrane protein degradation in plants. Nat Commun 11: 3284**

Google Scholar: [Author Only](#) [Title Only](#) [Author and Title](#)

**Huang S, Taylor NL, Whelan J, Millar AH (2009) Refining the definition of plant mitochondrial presequences through analysis of sorting signals, N-terminal modifications, and cleavage motifs. Plant Physiol 150: 1272-1285**

Google Scholar: [Author Only](#) [Title Only](#) [Author and Title](#)

**Huffaker A, Pearce G, Ryan CA (2006) An endogenous peptide signal in Arabidopsis activates components of the innate immune response. Proc Natl Acad Sci U S A 103: 10098-10103**

Google Scholar: [Author Only](#) [Title Only](#) [Author and Title](#)

**Hulstaert N, Shofstahl J, Sachsenberg T, Walzer M, Barsnes H, Martens L, Perez-Riverol Y (2020) ThermoRawFileParser: Modular, Scalable, and Cross-Platform RAW File Conversion. J Proteome Res 19: 537-542**

Google Scholar: [Author Only](#) [Title Only](#) [Author and Title](#)

**Kaufmann C, Sauter M (2019) Sulfated plant peptide hormones. J Exp Bot 70: 4267-4277**

Google Scholar: [Author Only](#) [Title Only](#) [Author and Title](#)

**Keller A, Eng J, Zhang N, Li XJ, Aebersold R (2005) A uniform proteomics MS/MS analysis platform utilizing open XML file formats. Mol Syst Biol 1: 2005 0017**

Google Scholar: [Author Only](#) [Title Only](#) [Author and Title](#)

**Keller A, Nesvizhskii AI, Kolker E, Aebersold R (2002) Empirical statistical model to estimate the accuracy of peptide identifications made by MS/MS and database search. Anal Chem 74: 5383-5392**

Google Scholar: [Author Only](#) [Title Only](#) [Author and Title](#)

**Kim JS, Jeon BW, Kim J (2021) Signaling Peptides Regulating Abiotic Stress Responses in Plants. Front Plant Sci 12: 704490**

Google Scholar: [Author Only](#) [Title Only](#) [Author and Title](#)

**Kim MS, Zhong J, Pandey A (2016) Common errors in mass spectrometry-based analysis of post-translational modifications. *Proteomics* 16: 700-714**

Google Scholar: [Author Only](#) [Title Only](#) [Author and Title](#)

**King NL, Deutsch EW, Ranish JA, Nesvizhskii AI, Eddes JS, Mallick P, Eng J, Desiere F, Flory M, Martin DB, Kim B, Lee H, Raught B, Aebersold R (2006) Analysis of the *Saccharomyces cerevisiae* proteome with PeptideAtlas. *Genome Biol* 7: R106**

Google Scholar: [Author Only](#) [Title Only](#) [Author and Title](#)

**Kleifeld O, Doucet A, Prudova A, auf dem Keller U, Gioia M, Kizhakkedathu JN, Overall CM (2011) Identifying and quantifying proteolytic events and the natural N terminome by terminal amine isotopic labeling of substrates. *Nat Protoc* 6: 1578-1611**

Google Scholar: [Author Only](#) [Title Only](#) [Author and Title](#)

**Kong AT, Leprevost FV, Avtonomov DM, Mellacheruvu D, Nesvizhskii AI (2017) MSFragger: ultrafast and comprehensive peptide identification in mass spectrometry-based proteomics. *Nat Methods* 14: 513-520**

Google Scholar: [Author Only](#) [Title Only](#) [Author and Title](#)

**Koornneef M, Meinke D (2011) The development of *Arabidopsis* as a model plant. *Plant J* 61: 909-921**

Google Scholar: [Author Only](#) [Title Only](#) [Author and Title](#)

**Kyte J, Doolittle RF (1982) A simple method for displaying the hydropathic character of a protein. *J Mol Biol* 157: 105-132**

Google Scholar: [Author Only](#) [Title Only](#) [Author and Title](#)

**Lamesch P, Berardini TZ, Li D, Swarbreck D, Wilks C, Sasidharan R, Muller R, Dreher K, Alexander DL, Garcia-Hernandez M, Karthikeyan AS, Lee CH, Nelson WD, Ploetz L, Singh S, Wensel A, Huala E (2012) The *Arabidopsis* Information Resource (TAIR): improved gene annotation and new tools. *Nucleic Acids Res* 40: D1202-1210**

Google Scholar: [Author Only](#) [Title Only](#) [Author and Title](#)

**Li W, O'Neill KR, Haft DH, DiCuccio M, Chetvernin V, Badretdin A, Coulouris G, Chitsaz F, Derbyshire MK, Durkin AS, Gonzales NR, Gwadz M, Lanczycki CJ, Song JS, Thanki N, Wang J, Yamashita RA, Yang M, Zheng C, Marchler-Bauer A, Thibaud-Nissen F (2021) RefSeq: expanding the Prokaryotic Genome Annotation Pipeline reach with protein family model curation. *Nucleic Acids Res* 49: 1020-1028**

Google Scholar: [Author Only](#) [Title Only](#) [Author and Title](#)

**Liao Y, Smyth GK, Shi W (2014) featureCounts: an efficient general purpose program for assigning sequence reads to genomic features. *Bioinformatics* 30: 923-930**

Google Scholar: [Author Only](#) [Title Only](#) [Author and Title](#)

**Ma J, Chen T, Wu S, Yang C, Bai M, Shu K, Li K, Zhang G, Jin Z, He F, Hermjakob H, Zhu Y (2019) iProX: an integrated proteome resource. *Nucleic Acids Res* 47: D1211-D1217**

Google Scholar: [Author Only](#) [Title Only](#) [Author and Title](#)

**Maddelein D, Colaert N, Buchanan I, Hulstaert N, Gevaert K, Martens L (2015) The iceLogo web server and SOAP service for determining protein consensus sequences. *Nucleic Acids Res* 43: W543-546**

Google Scholar: [Author Only](#) [Title Only](#) [Author and Title](#)

**Malmstrom J, Beck M, Schmidt A, Lange V, Deutsch EW, Aebersold R (2009) Proteome-wide cellular protein concentrations of the human pathogen *Leptospira interrogans*. *Nature* 460: 762-765**

Google Scholar: [Author Only](#) [Title Only](#) [Author and Title](#)

**Martens L, Chambers M, Sturm M, Kessner D, Levander F, Shofstahl J, Tang WH, Rompp A, Neumann S, Pizarro AD, Montecchi-Palazzi L, Tasman N, Coleman M, Reisinger F, Souda P, Hermjakob H, Binz PA, Deutsch EW (2011) mzML--a community standard for mass spectrometry data. *Mol Cell Proteomics* 10: R110 000133**

Google Scholar: [Author Only](#) [Title Only](#) [Author and Title](#)

**Matsubayashi Y (2014) Posttranslationally modified small-peptide signals in plants. *Annu Rev Plant Biol* 65: 385-413**

Google Scholar: [Author Only](#) [Title Only](#) [Author and Title](#)

**McCord J, Sun Z, Deutsch EW, Moritz RL, Muddiman DC (2017) The PeptideAtlas of the Domestic Laying Hen. *J Proteome Res* 16: 1352-1363**

Google Scholar: [Author Only](#) [Title Only](#) [Author and Title](#)

**Medina J, Ballesteros ML, Salinas J (2007) Phylogenetic and functional analysis of *Arabidopsis* RCI2 genes. *J Exp Bot* 58: 4333-4346**

Google Scholar: [Author Only](#) [Title Only](#) [Author and Title](#)

**Meinke DW, Cherry JM, Dean C, Rounsley SD, Koornneef M (1998) *Arabidopsis thaliana*: a model plant for genome analysis. *Science* 282: 662, 679-682**

Google Scholar: [Author Only](#) [Title Only](#) [Author and Title](#)

**Meinzel T, Giglione C (2022) N-terminal modifications, the associated processing machinery, and their evolution in plastid-**

**containing organisms. J Exp Bot 73: 6013-6033**

Google Scholar: [Author Only](#) [Title Only](#) [Author and Title](#)

**Mergner J, Frejno M, List M, Papacek M, Chen X, Chaudhary A, Samaras P, Richter S, Shikata H, Messerer M, Lang D, Atmann S, Cyprys P, Zolg DP, Mathieson T, Bantscheff M, Hazarika RR, Schmidt T, Dawid C, Dunkel A, Hofmann T, Sprunck S, Falter-Braun P, Johannes F, Mayer KFX, Jurgens G, Wilhelm M, Baumbach J, Grill E, Schneitz K, Schwechheimer C, Kuster B (2020) Mass-spectrometry-based draft of the Arabidopsis proteome. Nature 579: 409-414**

Google Scholar: [Author Only](#) [Title Only](#) [Author and Title](#)

**Michalik S, Depke M, Murr A, Gesell Salazar M, Kusebauch U, Sun Z, Meyer TC, Surmann K, Pfortner H, Hildebrandt P, Weiss S, Palma Medina LM, Gutjahr M, Hammer E, Becher D, Pribyl T, Hammerschmidt S, Deutsch EW, Bader SL, Hecker M, Moritz RL, Mader U, Volker U, Schmidt F (2017) A global Staphylococcus aureus proteome resource applied to the in vivo characterization of host-pathogen interactions. Sci Rep 7: 9718**

Google Scholar: [Author Only](#) [Title Only](#) [Author and Title](#)

**Moriya Y, Kawano S, Okuda S, Watanabe Y, Matsumoto M, Takami T, Kobayashi D, Yamanouchi Y, Araki N, Yoshizawa AC, Tabata T, Iwasaki M, Sugiyama N, Tanaka S, Goto S, Ishihama Y (2019) The jPOST environment: an integrated proteomics data repository and database. Nucleic Acids Res 47: D1218-D1224**

Google Scholar: [Author Only](#) [Title Only](#) [Author and Title](#)

**Muller T, Winter D (2017) Systematic Evaluation of Protein Reduction and Alkylation Reveals Massive Unspecific Side Effects by Iodine-containing Reagents. Mol Cell Proteomics 16: 1173-1187**

Google Scholar: [Author Only](#) [Title Only](#) [Author and Title](#)

**Nissa MU, Reddy PJ, Pinto N, Sun Z, Ghosh B, Moritz RL, Goswami M, Srivastava S (2022) The PeptideAtlas of a widely cultivated fish Labeo rohita: A resource for the Aquaculture Community. Sci Data 9: 171**

Google Scholar: [Author Only](#) [Title Only](#) [Author and Title](#)

**Niu B, Martinelli li M, Jiao Y, Wang C, Cao M, Wang J, Meinke E (2020) Nonspecific cleavages arising from reconstitution of trypsin under mildly acidic conditions. PLoS One 15: e0236740**

Google Scholar: [Author Only](#) [Title Only](#) [Author and Title](#)

**Olsson V, Joos L, Zhu S, Gevaert K, Butenko MA, De Smet I (2019) Look Closely, the Beautiful May Be Small: Precursor-Derived Peptides in Plants. Annu Rev Plant Biol 70: 153-186**

Google Scholar: [Author Only](#) [Title Only](#) [Author and Title](#)

**Omenn GS, Lane L, Overall CM, Paik YK, Cristea IM, Corrales FJ, Lindskog C, Weintraub S, Roehrl MHA, Liu S, Bandeira N, Srivastava S, Chen YJ, Aebersold R, Moritz RL, Deutsch EW (2021) Progress Identifying and Analyzing the Human Proteome: 2021 Metrics from the HUPO Human Proteome Project. J Proteome Res 20: 5227-5240**

Google Scholar: [Author Only](#) [Title Only](#) [Author and Title](#)

**Palos K, Nelson Dittrich AC, Yu L, Brock JR, Railey CE, Wu HL, Sokolowska E, Skirydz A, Hsu PY, Gregory BD, Lyons E, Beilstein MA, Nelson ADL (2022) Identification and functional annotation of long intergenic non-coding RNAs in Brassicaceae. Plant Cell 34: 3233-3260**

Google Scholar: [Author Only](#) [Title Only](#) [Author and Title](#)

**Parry G, Provart NJ, Brady SM, Uzilday B, Multinational Arabidopsis Steering C (2020) Current status of the multinational Arabidopsis community. Plant Direct 4: e00248**

Google Scholar: [Author Only](#) [Title Only](#) [Author and Title](#)

**Perez-Riverol Y, Bai J, Bandla C, Garcia-Seisdedos D, Hewapathirana S, Kamatchinathan S, Kundu DJ, Prakash A, Frericks-Zipper A, Eisenacher M, Walzer M, Wang S, Brazma A, Vizcaino JA (2022) The PRIDE database resources in 2022: a hub for mass spectrometry-based proteomics evidences. Nucleic Acids Res 50: D543-D552**

Google Scholar: [Author Only](#) [Title Only](#) [Author and Title](#)

**Perez-Riverol Y, Csordas A, Bai J, Bernal-Llinares M, Hewapathirana S, Kundu DJ, Inuganti A, Griss J, Mayer G, Eisenacher M, Perez E, Uszkoreit J, Pfeuffer J, Sachsenberg T, Yilmaz S, Tiwary S, Cox J, Audain E, Walzer M, Jarnuczak AF, Ternent T, Brazma A, Vizcaino JA (2018) The PRIDE database and related tools and resources in 2019: improving support for quantification data. Nucleic Acids Res 47: D442-D450**

Google Scholar: [Author Only](#) [Title Only](#) [Author and Title](#)

**Plant Cell Atlas C, Jha SG, Borowsky AT, Cole BJ, Fahlgren N, Farmer A, Huang SC, Karia P, Libault M, Provart NJ, Rice SL, Saura-Sanchez M, Agarwal P, Ahkami AH, Anderton CR, Briggs SP, Brophy JA, Denolf P, Di Costanzo LF, Exposito-Alonso M, Giacomello S, Gomez-Cano F, Kaufmann K, Ko DK, Kumar S, Malkovskiy AV, Nakayama N, Obata T, Otegui MS, Palfalvi G, Quezada-Rodriguez EH, Singh R, Uhrig RG, Waese J, Van Wijk K, Wright RC, Ehrhardt DW, Birnbaum KD, Rhee SY (2021) Vision, challenges and opportunities for a Plant Cell Atlas. Elife 10**

Google Scholar: [Author Only](#) [Title Only](#) [Author and Title](#)

**Pozoga M, Armbruster L, Wirtz M (2022) From Nucleus to Membrane: A Subcellular Map of the N-Acetylation Machinery in Plants. Int J Mol Sci 23**

Google Scholar: [Author Only](#) [Title Only](#) [Author and Title](#)

**Provart NJ, Brady SM, Parry G, Schmitz RJ, Queitsch C, Bonetta D, Waese J, Schneeberger K, Loraine AE (2021) Anno genomis XX: 20 years of Arabidopsis genomics. Plant Cell 33: 832-845**

Google Scholar: [Author Only](#) [Title Only](#) [Author and Title](#)

**Pullman BS, Wertz J, Carver J, Bandeira N (2018) ProteinExplorer: A Repository-Scale Resource for Exploration of Protein Detection in Public Mass Spectrometry Data Sets. J Proteome Res 17: 4227-4234**

Google Scholar: [Author Only](#) [Title Only](#) [Author and Title](#)

**Puthiyaveetil S, McKenzie SD, Kayanja GE, Ibrahim IM (2021) Transcription initiation as a control point in plastid gene expression. Biochim Biophys Acta Gene Regul Mech 1864: 194689**

Google Scholar: [Author Only](#) [Title Only](#) [Author and Title](#)

**Rauniyar N, Yates JR, 3rd (2014) Isobaric labeling-based relative quantification in shotgun proteomics. J Proteome Res 13: 5293-5309**

Google Scholar: [Author Only](#) [Title Only](#) [Author and Title](#)

**Reales-Calderon JA, Sun Z, Mascaraque V, Perez-Navarro E, Vialas V, Deutsch EW, Moritz RL, Gil C, Martinez JL, Molero G (2021) A wide-ranging Pseudomonas aeruginosa PeptideAtlas build: A useful proteomic resource for a versatile pathogen. J Proteomics 239: 104192**

Google Scholar: [Author Only](#) [Title Only](#) [Author and Title](#)

**Rodriguez E, Chevalier J, Olsen J, Ansol J, Kapousidou V, Zuo Z, Svenning S, Lofke C, Koemeda S, Drozdowskyj PS, Jez J, Durnberger G, Kuenzl F, Schutzbier M, Mechtler K, Ebstrup EN, Lolle S, Dagdas Y, Petersen M (2020) Autophagy mediates temporary reprogramming and dedifferentiation in plant somatic cells. EMBO J 39: e103315**

Google Scholar: [Author Only](#) [Title Only](#) [Author and Title](#)

**Ross S, Giglione C, Pierre M, Espagne C, Meinel T (2005) Functional and developmental impact of cytosolic protein N-terminal methionine excision in Arabidopsis. Plant Physiol 137: 623-637**

Google Scholar: [Author Only](#) [Title Only](#) [Author and Title](#)

**Rowland E, Kim J, Bhuiyan NH, van Wijk KJ (2015) The Arabidopsis Chloroplast Stroma N-Terminome: Complexities of Amino-Terminal Protein Maturation and Stability. Plant Physiol 169: 1881-1896**

Google Scholar: [Author Only](#) [Title Only](#) [Author and Title](#)

**Rytz TC, Miller MJ, McLoughlin F, Augustine RC, Marshall RS, Juan YT, Charng YY, Scalf M, Smith LM, Vierstra RD (2018) SUMOylome Profiling Reveals a Diverse Array of Nuclear Targets Modified by the SUMO Ligase SIZ1 during Heat Stress. Plant Cell 30: 1077-1099**

Google Scholar: [Author Only](#) [Title Only](#) [Author and Title](#)

**Sanderfoot AA, Kovaleva V, Zheng H, Raikhel NV (1999) The t-SNARE AtVAM3p resides on the prevacuolar compartment in Arabidopsis root cells. Plant Physiol 121: 929-938**

Google Scholar: [Author Only](#) [Title Only](#) [Author and Title](#)

**Schittmayer M, Fritz K, Liesinger L, Griss J, Birner-Gruenberger R (2016) Cleaning out the Litterbox of Proteomic Scientists' Favorite Pet: Optimized Data Analysis Avoiding Trypsin Artifacts. J Proteome Res 15: 1222-1229**

Google Scholar: [Author Only](#) [Title Only](#) [Author and Title](#)

**Sharma V, Eckels J, Schilling B, Ludwig C, Jaffe JD, MacCoss MJ, MacLean B (2018) Panorama Public: A Public Repository for Quantitative Data Sets Processed in Skyline. Mol Cell Proteomics 17: 1239-1244**

Google Scholar: [Author Only](#) [Title Only](#) [Author and Title](#)

**Shteynberg D, Deutsch EW, Lam H, Eng JK, Sun Z, Tasman N, Mendoza L, Moritz RL, Aebersold R, Nesvizhskii AI (2011) iProphet: multi-level integrative analysis of shotgun proteomic data improves peptide and protein identification rates and error estimates. Mol Cell Proteomics 10: M111 007690**

Google Scholar: [Author Only](#) [Title Only](#) [Author and Title](#)

**Shteynberg DD, Deutsch EW, Campbell DS, Hoopmann MR, Kusebauch U, Lee D, Mendoza L, Midha MK, Sun Z, Whetton AD, Moritz RL (2019) PTMPProphet: Fast and Accurate Mass Modification Localization for the Trans-Proteomic Pipeline. J Proteome Res 18: 4262-4272**

Google Scholar: [Author Only](#) [Title Only](#) [Author and Title](#)

**Silva J, Ferraz R, Dupree P, Showalter AM, Coimbra S (2020) Three Decades of Advances in Arabinogalactan-Protein Biosynthesis. Front Plant Sci 11: 610377**

Google Scholar: [Author Only](#) [Title Only](#) [Author and Title](#)

**Sloan DB, Wu Z, Sharbrough J (2018) Correction of Persistent Errors in Arabidopsis Reference Mitochondrial Genomes. Plant Cell 30: 525-527**

Google Scholar: [Author Only](#) [Title Only](#) [Author and Title](#)

**Somerville CR, Ogren WL (1980) Inhibition of photosynthesis in Arabidopsis mutants lacking leaf glutamate synthase activity. Nature 286: 257-259**

Google Scholar: [Author Only](#) [Title Only](#) [Author and Title](#)

**Somerville CR, Ogren WL (1982) Mutants of the cruciferous plant Arabidopsis thaliana lacking glycine decarboxylase activity. Biochem J 202: 373-380**

Google Scholar: [Author Only](#) [Title Only](#) [Author and Title](#)

**Stintzi A, Schaller A (2022) Biogenesis of post-translationally modified peptide signals for plant reproductive development. Curr Opin Plant Biol 69: 102274**

Google Scholar: [Author Only](#) [Title Only](#) [Author and Title](#)

**Sun Q, Zybailov B, Majeran W, Friso G, Olinares PD, van Wijk KJ (2009) PPDB, the Plant Proteomics Database at Cornell. Nucleic Acids Res 37: D969-974**

Google Scholar: [Author Only](#) [Title Only](#) [Author and Title](#)

**Takahashi F, Hanada K, Kondo T, Shinozaki K (2019) Hormone-like peptides and small coding genes in plant stress signaling and development. Curr Opin Plant Biol 51: 88-95**

Google Scholar: [Author Only](#) [Title Only](#) [Author and Title](#)

**Tavormina P, De Coninck B, Nikonorova N, De Smet I, Cammue BP (2015) The Plant Peptidome: An Expanding Repertoire of Structural Features and Biological Functions. Plant Cell 27: 2095-2118**

Google Scholar: [Author Only](#) [Title Only](#) [Author and Title](#)

**Tilak P, Kotnik F, Nee G, Seidel J, Sindlinger J, Heinkow P, Eirich J, Schwarzer D, Finkemeier I (2023) Proteome-wide lysine acetylation profiling to investigate the involvement of histone deacetylase HDA5 in the salt stress response of Arabidopsis leaves. Plant J**

Google Scholar: [Author Only](#) [Title Only](#) [Author and Title](#)

**Tost AS, Kristensen A, Olsen LI, Axelsen KB, Fuglsang AT (2021) The PSY Peptide Family-Expression, Modification and Physiological Implications. Genes (Basel) 12**

Google Scholar: [Author Only](#) [Title Only](#) [Author and Title](#)

**UniProt C (2020) UniProt: the universal protein knowledgebase in 2021. Nucleic Acids Res**

Google Scholar: [Author Only](#) [Title Only](#) [Author and Title](#)

**UniProt C (2023) UniProt: the Universal Protein Knowledgebase in 2023. Nucleic Acids Res 51: D523-D531**

Google Scholar: [Author Only](#) [Title Only](#) [Author and Title](#)

**van Dongen JT, Licausi F (2015) Oxygen sensing and signaling. Annu Rev Plant Biol 66: 345-367**

Google Scholar: [Author Only](#) [Title Only](#) [Author and Title](#)

**van Wijk KJ, Friso G, Walther D, Schulze WX (2014) Meta-Analysis of Arabidopsis thaliana Phospho-Proteomics Data Reveals Compartmentalization of Phosphorylation Motifs. Plant Cell 26: 2367-2389**

Google Scholar: [Author Only](#) [Title Only](#) [Author and Title](#)

**van Wijk KJ, Leppert T, Sun Q, Boguraev SS, Sun Z, Mendoza L, Deutsch EW (2021) The Arabidopsis PeptideAtlas: Harnessing worldwide proteomics data to create a comprehensive community proteomics resource. Plant Cell 33: 3421-3453**

Google Scholar: [Author Only](#) [Title Only](#) [Author and Title](#)

**Verrastro I, Pasha S, Jensen KT, Pitt AR, Spickett CM (2015) Mass spectrometry-based methods for identifying oxidized proteins in disease: advances and challenges. Biomolecules 5: 378-411**

Google Scholar: [Author Only](#) [Title Only](#) [Author and Title](#)

**Walton A, Stes E, Cybulski N, Van Bel M, Inigo S, Durand AN, Timmerman E, Heyman J, Pauwels L, De Veylder L, Goossens A, De Smet I, Coppens F, Goormachtig S, Gevaert K (2016) It's Time for Some "Site"-Seeing: Novel Tools to Monitor the Ubiquitin Landscape in Arabidopsis thaliana. Plant Cell 28: 6-16**

Google Scholar: [Author Only](#) [Title Only](#) [Author and Title](#)

**Waltz F, Nguyen TT, Arrive M, Bochler A, Chicher J, Hammann P, Kuhn L, Quadrado M, Mireau H, Hashem Y, Giege P (2019) Small is big in Arabidopsis mitochondrial ribosome. Nat Plants 5: 106-117**

Google Scholar: [Author Only](#) [Title Only](#) [Author and Title](#)

**Weits DA, van Dongen JT, Licausi F (2021) Molecular oxygen as a signaling component in plant development. New Phytol 229: 24-35**

Google Scholar: [Author Only](#) [Title Only](#) [Author and Title](#)

**White MD, Klecker M, Hopkinson RJ, Weits DA, Mueller C, Naumann C, O'Neill R, Wickens J, Yang J, Brooks-Bartlett JC, Garman EF, Grossmann TN, Dissmeyer N, Flashman E (2017) Plant cysteine oxidases are dioxygenases that directly enable arginyl transferase-catalysed arginylation of N-end rule targets. Nat Commun 8: 14690**

Google Scholar: [Author Only](#) [Title Only](#) [Author and Title](#)

**Willems P (2022) Exploring Posttranslational Modifications with the Plant PTM Viewer. Methods Mol Biol 2447: 285-296**

Google Scholar: [Author Only](#) [Title Only](#) [Author and Title](#)

**Willems P, Ndah E, Jonckheere V, Van Breusegem F, Van Damme P (2021) To New Beginnings: Riboproteogenomics Discovery of N-Terminal Proteoforms in Arabidopsis Thaliana. Front Plant Sci 12: 778804**

Google Scholar: [Author Only](#) [Title Only](#) [Author and Title](#)

**Willoughby AC, Nimchuk ZL (2021) WOX going on: CLE peptides in plant development. Curr Opin Plant Biol 63: 102056**

Google Scholar: [Author Only](#) [Title Only](#) [Author and Title](#)

**Wu GZ, Bock R (2021) GUN control in retrograde signaling: How GENOMES UNCOUPLED proteins adjust nuclear gene expression to plastid biogenesis. Plant Cell 33: 457-474**

Google Scholar: [Author Only](#) [Title Only](#) [Author and Title](#)

**Yuan B, Wang H (2021) Peptide Signaling Pathways Regulate Plant Vascular Development. Front Plant Sci 12: 719606**

Google Scholar: [Author Only](#) [Title Only](#) [Author and Title](#)

**Zhang M, Tan FQ, Fan YJ, Wang TT, Song X, Xie KD, Wu XM, Zhang F, Deng XX, Grosser JW, Guo WW (2022) Acetylome reprogramming participates in the establishment of fruit metabolism during polyploidization in citrus. Plant Physiol 190: 2519-2538**

Google Scholar: [Author Only](#) [Title Only](#) [Author and Title](#)

**Zhong S, Liu M, Wang Z, Huang Q, Hou S, Xu YC, Ge Z, Song Z, Huang J, Qiu X, Shi Y, Xiao J, Liu P, Guo YL, Dong J, Dresselhaus T, Gu H, Qu LJ (2019) Cysteine-rich peptides promote interspecific genetic isolation in Arabidopsis. Science 364**

Google Scholar: [Author Only](#) [Title Only](#) [Author and Title](#)

**Zybailov B, Sun Q, van Wijk KJ (2009) Workflow for large scale detection and validation of peptide modifications by RPLC-LTQ-Orbitrap: application to the Arabidopsis thaliana leaf proteome and an online modified peptide library. Anal Chem 81: 8015-8024**

Google Scholar: [Author Only](#) [Title Only](#) [Author and Title](#)
